# Supplementary material for: Airborne geographical dispersal of Q fever from livestock holdings to human communities: a systematic review and critical appraisal of evidence
Source: BMC Infect Dis. 2018 May 15;18:218. doi: 10.1186/s12879-018-3135-4 (PMC5952368; doi:10.1186/s12879-018-3135-4)
Supplement: Supplementary file 3 — Raw literature search results. A .csv file containing data on the 298 research articles identified in primary searches. (CSV 533 kb) [file 12879_2018_3135_MOESM3_ESM.csv]

title	abstract	year	Included?	Study Design	Span of Study	Location	Subject Number	Descriptive Results	Rural/Community/Occupational	Infective distance	Notes	authors	journal	vol	issue	pages	key_words	doi	pmid	url
AN IMPORTANT OUTBREAK OF HUMAN Q FEVER IN A SWISS ALPINE VALLEY	We describe an important Q fever human epidemic involving 415 serologically confirmed cases in the Val de Bagnes (Valais, Switzerland) during the autumn of 1983. The ages of the 415 cases with acute Q fever ranged from 8 to 82 years with a mean of 35 years, of whom 58% (240) were men and 42% (175) were women. This outbreak started about three weeks after 12 flocks of sheep (between 850 and 900 an…	1987	Yes	Descriptive - Case Report	1983	Valais, Switzerland	415 human cases	900 aniamls descended from alpine pastures to the valley. 21.1% of population of villages located along the road contracted Q fever. Comparatively, the inhabitatnts of the higher villages away from the road followed by the sheep were only slightly affects (2.9%).	Rural	1000-2000m	Calculate difference in distance between villages on the road and away from the road	Dupuis G, Petite J, Péter O, Vouilloz M.	INTERNATIONAL JOURNAL OF EPIDEMIOLOGY	16	2	282-7			3301708
SPATIAL PREDICTION OF COXIELLA BURNETII OUTBREAK EXPOSURE VIA NOTIFIED CASE COUNTS IN A DOSE–RESPONSE MODEL	We develop a novel approach to study an outbreak of Q fever in 2009 in the Netherlands by combining a human dose-response model with geostatistics prediction to relate probability of infection and associated probability of illness to an effective dose of Coxiella burnetii. The spatial distribution of the 220 notified cases in the at-risk population are translated into a smooth spatial field of do…	2017	Yes	Analytic - Observational - Cohort (Retrospective)	2009	The Netherlands	220	Used spatial GLMM to find that 1 km from source results in 71% concentration of infective dose. At 5 km distance, the effective dose is 18% that of the source and at 10 km it would only be 3%	Urban	1-5km		Brooke, Russell J Kretzschmar, Mirjam EE Hackert, Volker Hoebe, Christian JPA Teunis, Peter FM Waller, Lance A	EPIDEMIOLOGY	28	1	127-135		10.1097/EDE.0000000000000574	27768623
A LARGE OUTBREAK OF Q FEVER IN THE WEST MIDLANDS: WINDBORNE SPREAD INTO A METROPOLITAN AREA?	The largest outbreak of the zoonotic disease Q fever recorded in the United Kingdom (UK) occurred in Birmingham in 1989. One hundred and forty-seven cases were identified, 125 of whom were males, and 130 of whom were between 16 and 64 years of age. Fewer cases of Asian ethnic origin were observed than expected (p < 0.01), and more smokers (p < 0.005). A case control study (26 cases and 52 matched…	1998	Yes	Analytic - Observational - Cohort (Retrospective)	1989	Birmingham, UK	147	A GIS model was used to study the spatial locations of infections and plot concentric buffer zones to attempt to identify putative sources. Southerly gales from an outdoor farm where lambing and calving was taking place. Four cattle abortions and one sheep abortion were notified in April and May from the putative source area	urban	18000m (odds ratio of infection is highest within the first 9km of the putative source)		Hawker, J I, Ayres, J G, Blair, I, Evans, M R, Smith, D L, Smith, E G, Burge, P S, Carpenter, M J, Caul, E O, Coupland, B, Desselberger, U, Farrell, I D, Saunders, P J, Wood, M J	COMMUNICABLE DISEASE AND PUBLIC HEALTH	1	3	180-7	Adolescent, Adult, Animals, Disease Outbreaks, England, Female, Humans, Male, Middle Aged, Q Fever, Retrospective Studies, Risk Factors, Urban Population, Wind, Zoonoses		9782633	https://www.researchgate.net/profile/Jon_Ayres/publication/13502962_A_large_outbreak_of_Q_fever_in_the_West_Midlands_windborne_spread_into_a_metropolitan_area/links/09e4150c05597897c9000000/A-large-outbreak-of-Q-fever-in-the-West-Midlands-windborne-spread-into-a-metropolitan-area.pdf
LARGE Q FEVER OUTBREAK DUE TO SHEEP FARMING NEAR RESIDENTIAL AREAS, GERMANY, 2005	In June 2005 Coxiella burnetii-infected sheep, grazing and lambing on a meadow bordering a residential area, caused a large Q fever outbreak (331 cases) in Germany. Our outbreak investigation provided attack rates (AR) by distance between residence and meadow, sex and age groups. The AR of people living within 50 m of the meadow was 11.8 %. It decreased the further the residence was from the mead…	2008	Yes	Analytic - Observational - Cohort (Retrospective)	Jun-05	Germany	331 human cases	331 cases in Germany in a residential area boredering on a meadow with infected sheep. Attack rates for 50m of the meadow was 11.8% and attack rates for 350-400m of the meadow was 1.3%.	Urban	50m (11.8%)		Gilsdorf, A, Kroh, C, Grimm, S, Jensen, E, Wagner-Wiening, C, Alpers, K	EPIDEMIOLOGY AND INFECTION	136	8	1084-1087		10.1017/S0950268807009533	17892631	https://www.cambridge.org/core/product/identifier/S0950268807009533/type/journal_article
THE USE OF A GEOGRAPHIC INFORMATION SYSTEM TO IDENTIFY A DAIRY GOAT FARM AS THE MOST LIKELY SOURCE OF AN URBAN Q-FEVER OUTBREAK	Background: A Q-fever outbreak occurred in an urban area in the south of the Netherlands in May 2008. The distribution and timing of cases suggested a common source. We studied the spatial relationship between the residence locations of human cases and nearby small ruminant farms, of which one dairy goat farm had experienced abortions due to Q-fever since mid April 2008. A generic geographic info…	2010	Yes	Analytic - Observational - Cohort (Retrospective)	2008	Netherlands	96 human cases	A GIS was used to study the spatial relationship between the residence locations of human cases and nearby small ruminant farms, of which a dairy goat farm had experienced abortions. Those living 2000m away had a much higher risk for Q fever than those living more than 5km away.	Urban	2000m		Schimmer, B, Ter Schegget, R, Wegdam, M, Zuchner, L, de Bruin, A, Schneeberger, PM, Veenstra, T, Vellema, P, van der Hoek, W	BMC INFECTIOUS DISEASES	10		-		10.1186/1471-2334-10-69	20230650	https://bmcinfectdis.biomedcentral.com/articles/10.1186/1471-2334-10-69
OUTBREAK OF Q FEVER, FLORAC, SOUTHERN FRANCE, SPRING 2007	Introduction: In May 2007, five patients with Q fever-like symptoms were reported in an agricultural educational center in the rural southern French town of Florac. An investigation was undertaken to identify the outbreak source and risk factors for infection, and to implement control measures. Materials and methods: We undertook active case finding. Cases were defined as individuals with an unex…	2011	Yes	Analytic - Observational - Cross-sectional	April 2007 - June 2007	Southern France	18 human cases, 121 tested	All farms within a 5km radius were tested for shedding, and all individuals in Florac during the study period with an unexplained fever underwent seroprevalence testing/ standardised questionaire. Data was collected to identify risk factors associated with Q-fever infection. Acute infection and living or working near an area where manure had been spread was found to be independently associated. C…	Rural	<5000m	Distance between the shedding farms and the town could be measured on the scaled map	King, LA, Goirand, L, Tissot-Dupont, H, Giunta, B, Giraud, C, Colardelle, C, Duquesne, V, Rousset, E, Aubert, M, Thiery, R, Calatayud, L, Daurat, G, Hocqueloux, L, Cicchelero, V, Golliot, F, de Valk, H	VECTOR-BORNE AND ZOONOTIC DISEASES	11	4	341-347	France, Q fever, Sheep	10.1089/vbz.2010.0050	21395417	http://dx.doi.org/10.1089/vbz.2010.0050
PROXIMITY TO GOAT FARMS AND COXIELLA BURNETII SEROPREVALENCE AMONG PREGNANT WOMEN	During 2007-2009, we tested serum samples from 2,004 pregnant women living in an area of high Q fever incidence in the Netherlands. Results confirmed that presence of antibodies against Coxiella burnetii is related to proximity to infected dairy goat farms. Pregnant women and patients with certain cardiovascular conditions should avoid these farms.	2011	Yes	Analytic - Observational - Cross-sectional	June 2007 - May 2009	Netherlands	181 human cases (past infection indicated by serum samples) 2004 humans tested	2,004 pregnant women living in a high incidence area for Q fever in the Netherlands had their serum sampled. Results show that presence of antibodies against Coxiella burnetii is related to proximity to infected dairy goat farms. In multivariate logistic regression analyses, considering the address density of the nieghbourhood and other variables, living <2km from a farm with clinical Q fever rem…	Urban	2000m		van der Hoek W, Meekelenkamp JC, Dijkstra F, Notermans DW, Bom B, Vellema P, Rietveld A, van Duynhoven YT, Leenders AC.	EMERGING INFECTIOUS DISEASES	17	12	2360-3		10.3201/eid1712.110738	22172140	NA
Q FEVER AND PNEUMONIA IN AN AREA WITH A HIGH LIVESTOCK DENSITY: A LARGE POPULATION-BASED STUDY	Concerns about public health risks of intensive animal production in the Netherlands continue to rise, in particular related to outbreaks of infectious diseases. The aim was to investigate associations between the presence of farm animals around the home address and Q fever and pneumonia. Electronic medical record data for the year 2009 of all patients of 27 general practitioners (GPs) in a regio…	2012	Yes	Analytic - Observational - Cohort (Prospective)	2009	Netherlands	923 human cases	Data was gathered from patients registered by their GP's for Q fever, and a clear exposure-response relationship between the number of goats within 5km of the home address and pneumonia was observed. A high density of goats in a densely populated region was associated with human Q fever. i.e. A large number of goats around the home address, and a short distance to the nearest goat farm were assoc…	Urban	5000m		Smit, LAM, van der Sman-de Beer, F, Opstal-van Winden, AWJ, Hooiveld, M, Beekhuizen, J, Wouters, IM, Yzermans, J, Heederik, D	PLOS ONE	7	6	-		10.1371/journal.pone.0038843	22685612	http://dx.plos.org/10.1371/journal.pone.0038843
Q FEVER: SINGLE-POINT SOURCE OUTBREAK WITH HIGH ATTACK RATES AND MASSIVE NUMBERS OF UNDETECTED INFECTIONS ACROSS AN ENTIRE REGION	Background. In early 2009, a dairy-goat annex care farm in South Limburg, the Netherlands, reported 220 Coxiella burnetii-related abortions in 450 pregnant goats. These preceded human cases and occurred in a region that was Q-fever free before 2009, providing a unique quasi-experimental setting for investigating regional transmission patterns associated with a Q-fever point source. Methods. Index…	2012	Yes	Analytic - Observational - Cohort (Prospective)	2009	South Limburg, Netherlands	253 human cases	Community cases were analysed using a GIS and incidence was estimated by seroprevalence, and risk factors were identified. Observed incidence ranged from 6.5% within 0-1km of the farm, to 0.1% (4-5km) and remained high beyond.	Urban	>5000m		Hackert, VH, van der Hoek, W, Dukers-Muijrers, N, de Bruin, A, Al Dahouk, S, Neubauer, H, Bruggeman, CA, Hoebe, CJPA	CLINICAL INFECTIOUS DISEASES	55	12	1591-1599		10.1093/cid/cis734	22918992	https://academic.oup.com/cid/article-lookup/doi/10.1093/cid/cis734
SMOOTH INCIDENCE MAPS GIVE VALUABLE INSIGHT INTO Q FEVER OUTBREAKS IN THE NETHERLANDS	From 2007 through 2009, The Netherlands faced large outbreaks of human Q fever. Control measures focused primarily on dairy goat farms because these were implicated as the main source of infection for the surrounding population. However, in other countries, outbreaks have mainly been associated with non-dairy sheep and The Netherlands has many more sheep than goats. Therefore, a public discussion…	2012	Yes	Analytic - Observational - Cohort (Retrospective)	2009	Netherlands	1740 Q fever cases	Dairy-goat annex care farm reported 220 Coxiella burnetii-related abortions in 450 pregnant goats. These preceded human cases and occurred in a region that was Q-fever free before 2009. All farm residents, visitors, household contract were traced for C. burnetii. True incidence, including undetected infections was estimated regionwide by seroprevalence in a pre- versus postourbreak sample, and ne…	Urban	>5000m		van der Hoek, W, van de Kassteele, J, Bom, B, de Bruin, A, Dijkstra, F, Schimmer, B, Vellema, P, ter Schegget, R, Schneeberger, PM	GEOSPATIAL HEALTH	7	1	127-134	Q fever, smooth incidence maps, dairy goats, The Netherlands		23242690	NA
A MODEL FOR THE EARLY IDENTIFICATION OF SOURCES OF AIRBORNE PATHOGENS IN AN OUTDOOR ENVIRONMENT	Background: Source identification in areas with outbreaks of airborne pathogens is often time-consuming and expensive. We developed a model to identify the most likely location of sources of airborne pathogens. Methods: As a case study, we retrospectively analyzed three Q fever outbreaks in the Netherlands in 2009, each with suspected exposure from a single large dairy goat farm. Model input cons…	2013	Yes	Descriptive - Case Report (Retrospective)	2009	Netherlands	717 human cases (120, 367 230)	Residential addresses, human population density data was used to define a spatial grid,and a measure of risk was calculated for each grid point using an exponentially declining function. Distances between hotspots and suspected goat farms ranged from 300-1500m.	Urban	300-1500m		van Leuken, JPG, Havelaar, AH, van der Hoek, W, Ladbury, GAF, Hackert, VH, Swart, AN	PLOS ONE	8	12	-		10.1371/journal.pone.0080412	24324598	http://dx.plos.org/10.1371/journal.pone.0080412
PARTICULATE MATTER STRONGLY ASSOCIATED WITH HUMAN Q FEVER IN THE NETHERLANDS: AN ECOLOGICAL STUDY	There are still questions about the importance of different animal reservoirs and environmental factors that played a role in the large Q fever epidemic in The Netherlands. We therefore investigated the spatial association between reported Q fever cases and different livestock and environmental factors at the national level. A spatial regression analysis was performed, with four-digit postal code…	2013	Yes	Analytic - Observational - Cross sectional	Jan 2007 and Dec 2011	Netherlands	4109 human cases	Data was gathered from all Q fever cases between 2007 and 2011 in the Netherlands, and the risk factors were analysed. The risk factor most strongly associated with Q fever incidence in the univariate analysis was the presence of an infected farm within 5km and a hihg level of particulate matter.	Urban	5000m		Reedijk, M, Van Leuken, JPG, Van der Hoek, W	EPIDEMIOLOGY AND INFECTION	141	12	2623-2633	Cattle, ecological study, goats, particulate matter, Q fever	10.1017/S0950268813000460	23481147	https://www.cambridge.org/core/product/identifier/S0950268813000460/type/journal_article
SPATIAL ANALYSIS OF POSITIVE AND NEGATIVE Q FEVER LABORATORY RESULTS FOR IDENTIFYING HIGH- AND LOW-RISK AREAS OF INFECTION IN THE NETHERLANDS	The Netherlands faced a large Q fever epidemic from 2007 to 2010, in which thousands of people were tested for the presence of antibodies against Coxiella burnetii as part of individual patient diagnosis. So far, only data of notified cases were used for the identification of high-risk areas, which can lead to misclassification of risk. Therefore, we identified high- and low-risk areas based on l…	2013	Yes	Analytic - Observational - Cohort (Retrospective)	2007-2010	Netherlands	11035 human patients	Used logistic regression and spatial statistics of retrospective infections and distances to nearby infected farms to assess risk of infection based on distance. Found that odds of infection was reduced by 21% for every 1km in distance from an infected farm	Urban	4100m (average distance of infected individuals from an infected farm)		van den Berg, Elsa J, Wielders, Cornelia C H, Schneeberger, Peter M, Wegdam-Blans, Marjolijn C, van der Hoek, Wim	INFECTION ECOLOGY & EPIDEMIOLOGY	3				10.3402/iee.v3i0.20432	24298327	NA
LAND-APPLIED GOAT MANURE AS A SOURCE OF HUMAN Q-FEVER IN THE NETHERLANDS, 2006-2010	Studies have shown a link between Q-fever positive farms (QFPFs) and community cases of human Q-fever. Our study is the first to investigate the potential role of contaminated land-applied manure in human Q-fever, based on a large set of nationwide notification and farm management data. Time between manure application and disease onset in geographically linked notified human cases coincided with …	2014	Yes	Analytic - Observational - Cohort (Retrospective)	2006-2010	Netherlands	3958 human cases	The human cases were georeferenced with the location of goat and sheep farms with clinical Q fever waves. Only 1.1% of human cases in 2009 were not related to a contaminated parcel within a distance of 10km. (1) Established temporal sequence of events regarding lambings, manure transports and human canses (2) The % of human cases related to QFPF or contaminated land parcel at 3 distance classe: 2…	Urban	0-2.5km: 29%, 2.5-5km:36%, 5km-10km:77% near QFPF. 1.1% of human cases in 2009 were not related to QFPF or contaminated parcel within 10km.	See risk calculation tables	Hermans, T, Jeurissen, L, Hackert, V, Hoebe, C	PLOS ONE	9	5	-		10.1371/journal.pone.0096607	24788538	http://dx.plos.org/10.1371/journal.pone.0096607
Q FEVER EPIDEMIC IN HUNGARY, APRIL TO JULY 2013	We investigated a Q fever outbreak with human patients showing high fever, respiratory tract symptoms, headache and retrosternal pain in southern Hungary in the spring and summer of 2013. Seventy human cases were confirmed by analysing their serum and blood samples with micro-immunofluorescence test and real-time PCR. The source of infection was a merino sheep flock of 450 ewes, in which 44.6% (2…	2014	Yes	Analytic- Observational - Cross-sectional	2013	Hungary	70 human cases	Centre of outbreak region was area of 10km2 encompassing rural towns of Vokany, Kostofalu. 1 merino sheep flock (n=450) in Vokay village identified as source of outbreak. Prototypical patrient was inhabitant of neighbouring rural towns (Vokany and Kistofalu), with no direct contact with the merino sheep. Hypothesised that dried manure and birth fluids were dispersed by winds.	Rural village	>10km		Gyuranecz, M, Sulyok, KM, Balla, E, Mag, T, Balazs, A, Simor, Z, Denes, B, Hornok, S, Bajnoczl, P, Hornstra, HM, Pearson, T, Keim, P, Dan, A	EUROSURVEILLANCE	19	30	9-13			NA	NA
SPATIAL RELATIONSHIPS IN THE Q FEVER OUTBREAKS 2007-2010 IN THE NETHERLANDS	We analyzed the Q fever epidemic in the Netherlands on a national scale from a spatial point of view. Data on dairy goat farms and Dutch population, whether or not infected, were geo-referenced. Human cases were counted in GIS at different distance classes for all dairy goat farms, farms with Q fever based on BTM analysis, and farms with clinical symptoms. In all selections, human incidence decre…	2014	Yes	Analytic - Observational - Cohort (Retrospective)	2006-2010	Netherlands	3817 human cases	Georeferencing of residential addresses of all notified Q fever cases found that there were significant clusters of Q fever patirnets, and relative risks detected around each of the 26 dairy goat farms with clinical Q fever symptoms. Nine of these clusters had a radius smaller than 5km, and five had a radius between 11km and 23km. Human incidences of Q fever decreases with increasing distance fro…	Urban	500-1000m (25% of cases were within this distance)	Graph provided	Commandeur, M, Jeurissen, L, van der Hoek, W, Roest, HJ, Hermans, T	INTERNATIONAL JOURNAL OF ENVIRONMENTAL HEALTH RESEARCH	24	2	137-157	spatial cluster, Coxiella burnetii, spatial planning, Q fever, incidence	10.1080/09603123.2013.800963	23802588	NA
SPECIFIC RISK FACTORS FOR CONTRACTING Q FEVER: LESSONS FROM THE OUTBREAK JENA	A Q fever outbreak with 331 reported cases in seven weeks occurred in a densely populated residential district in Jena (Germany) in 2005. Prompt identification of a stable infection source follow by an intense information policy, well defined and stable meteorological conditions and a large number of reported cases within one small community all allowed us to study promoting and protecting factor…	2014	Yes	Analytic - Observational - Cross sectional	2005	Jena, Germany	101 human cases	Demographic data was collected from residents of Jena (n=460), and a critical zone for residency within 500m of herds of gestating ewes in a typical urban dewlling area was found. Decreasing attack rates by rows with distance from the infectious source, with no cases more than 455m away.	Urban	500m		Boden, K, Brasche, S, Straube, E, Bischof, W	INTERNATIONAL JOURNAL OF HYGIENE AND ENVIRONMENTAL HEALTH	217	1	110-115	Coxiella burnetii, Q fever, Zoonoses, Risk of infection, Exposure, Shift work	10.1016/j.ijheh.2013.04.004	23707055	https://linkinghub.elsevier.com/retrieve/pii/S1438-4639(13)00058-8
INTEGRATING INTERDISCIPLINARY METHODOLOGIES FOR ONE HEALTH: GOAT FARM RE-IMPLICATED AS THE PROBABLE SOURCE OF AN URBAN Q FEVER OUTBREAK, THE NETHERLANDS, 2009	Background: In spring 2008, a goat farm experiencing Q fever abortions ("Farm A") was identified as the probable source of a human Q fever outbreak in a Dutch town. In 2009, a larger outbreak with 347 cases occurred in the town, despite no clinical Q fever being reported from any local farm. Methods: Our study aimed to identify the source of the 2009 outbreak by applying a combination of interdis…	2015	Yes	Analytic - Observational - Cohort (Retrospective)	2009	The Netherlands	347	Spatiotemporal GIS analyses used to assessrisk factors for aerosol transmission. Found that living within 1km of source increases risk by 46 times	Community	1km (the majority of cases occur within 1-2km of a putative source)		Ladbury, GAF, Van Leuken, JPG, Swart, A, Vellema, P, Schimmer, B, Ter Schegget, R, Van der Hoek, W	BMC INFECTIOUS DISEASES	15		-	Q fever, Atmospheric dispersion model, Coxiella burnetii, Spatio-temporal analysis, Airborne	10.1186/s12879-015-1083-9	26336097	https://bmcinfectdis.biomedcentral.com/articles/10.1186/s12879-015-1083-9
URBAN OUTBREAK OF Q FEVER, BRIANCON, FRANCE, MARCH TO JUNE 1996	Q fever is an ubiquitous zoonosis caused by the rickettsial organism Coxiella burnetii. Both sporadic cases and epidemics occur in areas where sheep and goats are bred. The main route of transmission is by inhalation of aerosols from the environment (soil	1997	Yes	Analytic - Observational - Cohort (Retrospective)	1996	Briancon, France		Increased risk at 250m compared to 1km distance of exposure to infective abattoir. Summarised by Carrieri et al. (2002), which postulated the outbreak was linked to contaminated sheep waste and aerosolisation due to a nearby heliport	Urban	1km		Armengaud, A, Kessalis, N, Desenclos, J-C., Maillot, E, Brousse, P, Brouqui, P, Tixier-Dupont, H, Raoult, D, Provensal, P, Obadia, Y	EURO SURVEILLANCE : BULLETIN EUROPEEN SUR LES MALADIES TRANSMISSIBLES = EUROPEAN COMMUNICABLE DISEASE BULLETIN	2	2	12-13			12631827	NA
INVESTIGATION OF A SLAUGHTERHOUSE-RELATED OUTBREAK OF Q FEVER IN THE FRENCH ALPS	The aim of the study presented here was to describe the different epidemiological methods used to investigate an outbreak of Q fever that occurred in the spring of 1996 among inhabitants of Briancon, a small town in the French Alps. Three approaches were used: (i) a comparison between a 2-month exhaustive serological survey among, blood donors and a retrospective serological survey performed on f…	2002	Yes	Analytic - Observational - Cohort (Retrospective)	1996	Briancon, France		Summarised findings from Armengaud et al. (1997), which showed increased risk at 250m compared to 1km distance of exposure to infective abattoir. Thought to be linked to contaminated sheep waste and aerosolisation due to a nearby heliport	Urban	1km		Carrieri, MP, Tissot-Dupont, H, Rey, D, Brousse, P, Renard, H, Obadia, Y, Raoult, D	EUROPEAN JOURNAL OF CLINICAL MICROBIOLOGY & INFECTIOUS DISEASES	21	1	17-21		10.1007/s10096-001-0645-5	11913496	NA
Q FEVER OUTBREAK IN HOMELESS SHELTER	Urban outbreaks of Q fever have occurred after exposure to slaughterhouses or parturient cats. We detected an outbreak of Q fever in a homeless shelter in Marseilles. Investigations showed that the main factors exposing persons to Coxiella burnetii were an abandoned slaughterhouse, used for an annual Muslim sheep feast, and wind.	2004	Yes	Analytic - Observational - Cohort (Retrospective)	1999-2002	Marseilles, France		Found infective distance <2km; Wind speeds 28-36km/h noted, likely to have played a large role in spreading the outbreak	Urban	2km		Brouqui, P, Badiaga, S, Raoult, D	EMERGING INFECTIOUS DISEASES	10	7	1297-1299			15324553	https://www.cdc.gov/ncidod/EID/vol10no7/03-1020.htm
CYNOMOLGUS MONKEY MODEL FOR EXPERIMENTAL Q FEVER INFECTION	A subhuman primate model was developed for study of the pathogenesis of infection with Coxiella burnetii. Cynomolgus monkeys (Macaca fascicularis) that were exposed to 10(5) mouse median infectious intraperitoneal doses of C. burnetii in a small-particle aerosol developed clinical signs of illness and pathologic changes characteristic of Q fever infection in humans. All monkeys had radiologic evi…	1979	No									Gonder, J C, Kishimoto, R A, Kastello, M D, Pedersen, C E, Larson, E W	THE JOURNAL OF INFECTIOUS DISEASES	139	2	191-6	Aerosols, Animals, Antibodies, Bacterial, Coxiella, Disease Models, Animal, Female, Fluorescent Antibody Technique, Haplorhini, Macaca, Macaca fascicularis, Male, Mice, Pneumonia, Q Fever, Radiography, Sepsis		108342	NA
IGM GLOBULIN RESPONSE IN Q FEVER (COXIELLA BURNETI) INFECTIONS	The IgM globulin response has been measured following the onset of primary Q fever infections. A complement fixation test method was used to measure the IgM after separation by ultracentrifugation in a sucrose density gradient. Specific IgM was demonstrable between 2 and 10 wk after onset of symptoms. The test can be used to confirm a recent infection when only a 'convalescent' blood specimen has…	1980	No									Murphy, A M, Magro, L	PATHOLOGY	12	3	391-6	Antibody Formation, Antibody Specificity, Complement Fixation Tests, Humans, Immunoglobulin M, Q Fever, Time Factors		7432817	NA
Q FEVER IN A QUEENSLAND MEATWORKS	An epidemiological study of Q fever infection in a Brisbane meatworks was undertaken. A retrospective 10-year study (1968 to 1977) revealed an average annual incidence of 1% for the nine years excluding 1969, while an outbreak with a 7.9% incidence occurred in 1969. No seasonal distribution was found. Results indicated that cattle form the major source of Coxiella burneti (infectious agent of Q f…	1980	No									McKelvie, P	THE MEDICAL JOURNAL OF AUSTRALIA	1	12	590-3	Abattoirs, Adolescent, Adult, Animals, Antibodies, Bacterial, Australia, Cattle, Disease Outbreaks, Employment, Humans, Middle Aged, Occupational Diseases, Q Fever, Retrospective Studies, Sheep, Swine		7402154	NA
FATAL, ACUTE NON-A, NON-B HEPATITIS WITH CONFLUENT NECROSIS. CASE REPORT AND PROPOSAL FOR DIAGNOSTIC WORK-UP	We are reporting a fatal case of acute Non-A, Non-B (NANB) hepatitis with massive liver destruction in a 58-year-old woman. NANB hepatitis is still a diagnosis by exclusion, and detailed knowledge of the endemic diseases associated with hepatitis in a given geographic area should be included in the diagnostic work-up. In Lebanon, where 97% of the adult population has anti-HAV in their sera, the I…	1982	No									Shamma'a, M, Feghali, S, Allam, C	INFECTION	10	3	165-7	Acute Disease, Antibodies, Viral, Biopsy, Diagnosis, Differential, Female, Hepatitis, Hepatitis C, Hepatitis, Viral, Human, Humans, Liver, Middle Aged, Necrosis, Q Fever		6809637	NA
DETECTION AND PERSISTENCE OF SPECIFIC IGM ANTIBODY TO COXIELLA BURNETII BY ENZYME-LINKED IMMUNOSORBENT ASSAY: A COMPARISON WITH IMMUNOFLUORESCENCE AND COMPLEMENT FIXATION TESTS	An enzyme-linked immunosorbent assay (ELISA) for specific IgM antibody to Coxiella burnetii was compared with the indirect immunofluorescence (FA) test in studies of 130 serum samples from 38 patients with Q fever. The IgM fractions obtained after rate zonal-density gradient ultracentrifugation of 37 serum samples from 12 patients were also studied in a complement fixation test (CF-DG). Specific …	1983	No									Field, P R, Hunt, J G, Murphy, A M	THE JOURNAL OF INFECTIOUS DISEASES	148	3	477-87	Antibodies, Bacterial, Complement Fixation Tests, Coxiella, Enzyme-Linked Immunosorbent Assay, Fluorescent Antibody Technique, Humans, Immunoenzyme Techniques, Immunoglobulin M, Q Fever, Rheumatoid Factor, Time Factors		6352826	NA
AN OUTBREAK OF Q FEVER PROBABLY DUE TO CONTACT WITH A PARTURIENT CAT	Thirty-three cases (24 definite, nine probable) of Q fever were diagnosed in Victoria County, Cape Breton, Nova Scotia from May to August, 1985. Twenty-six of the cases occurred in residents of Baddeck (population 900, attack rate 2.8 percent), and 21 of the cases occurred during the month of June. There was geographic clustering of the cases: 14 of the 33 (42 percent) lived or worked in four bui…	1988	No									Marrie, T J, MacDonald, A, Durant, H, Yates, L, McCormick, L	CHEST	93	1	98-103	Adolescent, Adult, Animals, Antibodies, Bacterial, Cat Diseases, Cats, Child, Coxiella, Disease Outbreaks, Female, Humans, Male, Middle Aged, Nova Scotia, Pregnancy, Pregnancy Complications, Infectious, Q Fever		3335174	https://linkinghub.elsevier.com/retrieve/pii/S0012-3692(16)33522-X
PROPERTIES OF PHASE I PURIFIED CELLULAR ANTIGEN OF COXIELLA BURNETII	An attempt was made to purify phase I cell suspension of Coxiella burnetii used as an antigen in diagnostic serological tests. Homogenised suspension of chick embryos infected with phase I Henzerling and "Z" strains, after preliminary purification from host cell contaminants of chick embryos was subjected to consecutive centrifugation in sucrose/uropoline gradient and to continuous 20-45% uropoli…	1989	No									Kruszewska, D, Rumin, W, Tylewska-Wierzbanowska, S	MEDYCYNA DOSWIADCZALNA I MIKROBIOLOGIA	41	3-4	170-5	Agglutination Tests, Animals, Antigens, Bacterial, Bacterial Proteins, Chick Embryo, Complement Fixation Tests, Coxiella, Epitopes, Guinea Pigs, Humans, Q Fever, Rabbits		2484257	NA
TRUCKIN PNEUMONIA - AN OUTBREAK OF Q-FEVER IN A TRUCK REPAIR PLANT PROBABLY DUE TO AEROSOLS FROM CLOTHING CONTAMINATED BY CONTACT WITH NEWBORN KITTENS		1989	No									MARRIE, TJ, LANGILLE, D, PAPUKNA, V, YATES, L	EPIDEMIOLOGY AND INFECTION	102	1	119-127			2917613	NA
AN EPIDEMIOLOGICAL STUDY OF AN OUTBREAK OF Q FEVER IN A SECONDARY SCHOOL	Five cases of clinical Q fever were identified amongst students and staff of a Somerset secondary school between 23 October 1987 and 21 December 1987. Five goats which were kept at the school were found to have antibodies to Coxiella burnetii phase II. A cross-sectional study was conducted at the school in July 1988. A single CF test was used to identify evidence of prior infection, and a self-ad…	1990	No									Jorm, L R, Lightfoot, N F, Morgan, K L	EPIDEMIOLOGY AND INFECTION	104	3	467-77	Adolescent, Animals, Antibodies, Bacterial, Coxiella, Cross-Sectional Studies, Disease Outbreaks, Female, Goats, Humans, Male, Poultry, Q Fever, Regression Analysis, Schools, Surveys and Questionnaires, United Kingdom		2347385	NA
ISOLATION AND CHARACTERIZATION OF A TREPONEMA PALLIDUM MAJOR 60-KILODALTON PROTEIN RESEMBLING THE GROEL PROTEIN OF ESCHERICHIA COLI	A native structure containing the major 60-kilodalton common antigen polypeptide (designated TpN60) was isolated from Treponema pallidum subsp. pallidum (Nichols strain) through a combination of differential centrifugation and sucrose density gradient sedimentation. Gel filtration chromatography indicated that this structure is a high-molecular-weight homo-oligomer of TpN60. Antisera to TpN60 rea…	1990	No									Houston, L S, Cook, R G, Norris, S J	JOURNAL OF BACTERIOLOGY	172	6	2862-70	Amino Acid Sequence, Bacterial Proteins, Chaperonins, Chromatography, Gel, Escherichia coli, Heat-Shock Proteins, Immunization, Microscopy, Electron, Molecular Sequence Data, Molecular Weight, Protein Conformation, Proteins, Treponema pallidum		1971618	http://jb.asm.org/cgi/pmidlookup?view=long&pmid=1971618
VACCINE PROPHYLAXIS OF ABATTOIR-ASSOCIATED Q FEVER: EIGHT YEARS' EXPERIENCE IN AUSTRALIAN ABATTOIRS	During the period 1981-8 a clinical trial of a Q fever vaccine (Q-vax; Commonwealth Serum Laboratories, Melbourne) has been conducted in abattoir workers and other at-risk groups in South Australia. Volunteers in four abattoirs and visitors to the abattoirs were given one subcutaneous dose of 30 micrograms of a formalin-inactivated, highly-purified Coxiella burnetii cells, Henzerling strain, Phas…	1990	No									Marmion, B P, Ormsbee, R A, Kyrkou, M, Wright, J, Worswick, D A, Izzo, A A, Esterman, A, Feery, B, Shapiro, R A	EPIDEMIOLOGY AND INFECTION	104	2	275-87	Abattoirs, Age Factors, Antibodies, Bacterial, Australia, Bacterial Vaccines, Coxiella, Female, Humans, Incidence, Male, Occupational Diseases, Prevalence, Q Fever, Queensland, Sex Factors, Skin Tests, South Australia, Vaccination, Vaccines, Inactivated		2323360	NA
AN OUTBREAK OF CAT-ASSOCIATED Q-FEVER IN THE UNITED-STATES	Q fever is usually acquired by contact with aerosols generated during parturition of domestic ungulates (e.g., sheep, cows, goats). In the maritime provinces of Canada, parturient cats have also been implicated in its transmission. A 66-year-old woman from eastern Maine developed high fever, rigors, headache, myalgias, pulmonary infiltrates, and elevated hepatocellular enzymes, and the diagnosis …	1991	No									PINSKY, RL, FISHBEIN, DB, GREENE, CR, GENSHEIMER, KF	JOURNAL OF INFECTIOUS DISEASES	164	1	202-204			2056206	NA
EPIDEMIOLOGY OF COMMUNITY-ACQUIRED PNEUMONIA IN THE HEALTH AREA I OF NAVARRA	During one year (1988), a protocol study of the community-acquired pneumonias was carried out in patients referred to the Hospital Virgen del Camino in Pamplona (Health Area I or Northern Navarra), so as to have an epidemiological and microbiological knowledge of this disease in this geographic area., A clinical protocol, microbiological investigation, 3 blood cultures, Gram stain and sputum cult…	1991	No									Carrillo de Albornoz, M M, P��rez de Heredia, J H, S��nchez Alvarez, J, Tiberio L��pez, G, Hern��ndez Palacios, R, Rivero Puente, A	MEDICINA CLINICA	97	2	50-2	Adolescent, Adult, Aged, Anti-Bacterial Agents, Cohort Studies, Female, Humans, Male, Middle Aged, Pneumonia, Pneumonia, Mycoplasma, Pneumonia, Viral, Spain		1895782	NA
EPIDEMIOLOGY OF RICKETTSIAL DISEASES	Rickettsial diseases have a diversity of epidemiologic characteristics reflective of the variety of ecologic situations in which the obligate intracellular bacteria are transmitted to humans. For the spotted fever group (SFG) rickettsiae, Rickettsia typhi. R. tsutsugamushi, Coxiella burnetii, and the human ehrlichial agent, humans are a dead-end host who plays no role in the maintenance of the or…	1991	No									WALKER, DH, FISHBEIN, DB	EUROPEAN JOURNAL OF EPIDEMIOLOGY	7	3	237-245	HUMAN EHRLICHIOSIS, RICKETTSIAL SPOTTED FEVERS, TYPHUS FEVERS, SCRUB TYPHUS, Q-FEVER, ZOONOSIS	10.1007/BF00145672	1884775	NA
HISTORY OF VETERINARY PUBLIC HEALTH IN AUSTRALASIA	The geographic isolation of Australasia has played a significant role in preventing the introduction of exotic diseases or in limiting the spread of many diseases which entered after settlement. Some infections such as psoroptic mange, tuberculosis and brucellosis became widely dispersed and some were ultimately to require novel methods to curtail them, e.g. greater use of rail and road transport…	1991	No									Hughes, K L	REVUE SCIENTIFIQUE ET TECHNIQUE (INTERNATIONAL OFFICE OF EPIZOOTICS)	10	4	1019-40	Animals, Australia, History, 19th Century, History, 20th Century, Humans, New Zealand, Public Health, Veterinary Medicine, Zoonoses		1840850	NA
EPIDEMIOLOGY OF Q-FEVER	Q fever is a worldwide zoonosis due to the rickettsia Coxiella bumetii, a strict intracellular organism, living in the phagolysosome of the host cell. The main particularity of Q fever is its clinical polymorphism. In acute cases, the most common clinical symptoms are self-limited febrile illness of unknown origin, granulomatous hepatitis (the most common clinical presentation in France), pneumon…	1992	No									TISSOTDUPONT, H, RAOULT, D	MEDECINE ET MALADIES INFECTIEUSES	22		51-58	Q-FEVER, COXIELLA-BURNETII, EPIDEMIOLOGY	10.1016/S0399-077X(05)81218-1	NA	NA
A LARGE Q FEVER OUTBREAK IN THE WEST MIDLANDS: CLINICAL ASPECTS	In the spring of 1989 the largest outbreak of acute Q fever recorded in the United Kingdom occurred in Solihull and surrounding areas of the West Midlands. The diagnosis was confirmed in 147 people, mainly males of working age. Windborne spread from farmland to the south of the urban area was the most likely route of infection. Fever was the commonest symptom, seen in 101/102 (99%) cases, followe…	1993	No									Smith, D L, Ayres, J G, Blair, I, Burge, P S, Carpenter, M J, Caul, E O, Coupland, B, Desselberger, U, Evans, M, Farrell, I D	RESPIRATORY MEDICINE	87	7	509-16	Adolescent, Adult, Aged, Animals, Child, Disease Outbreaks, England, Female, Humans, Male, Middle Aged, Q Fever, Sheep, Sheep Diseases, Zoonoses		8265838	NA
COMPARISON OF VIRULENCE FOR GUINEA PIGS AND MICE OF DIFFERENT COXIELLA BURNETII PHASE I STRAINS	Virulence of four Coxiella burnettii phase I strains associated with acute (Nine Mile and Luga strains) and chronic (S and Priscilla strains) forms of Q fever, respectively, for outbred guinea pigs and inbred BALB/c mice was compared. In guinea pigs exposed to infectious aerosol, virulence of the strains Nine Mile, Luga and S was similar, because they all caused lethal infection and high febrile …	1993	No									Kaz��r, J, Les��, M, Propper, P, Valkov��, D, Brezina, R	ACTA VIROLOGICA	37	6	437-48	Aerosols, Animals, Antibodies, Bacterial, Coxiella burnetii, Guinea Pigs, Humans, Mice, Mice, Inbred BALB C, Q Fever, Spleen, Virulence		8010182	NA
EIA WITH SPECIES-SPECIFIC MONOCLONAL ANTIBODIES: A NOVEL SEROEPIDEMIOLOGIC TOOL FOR DETERMINATION OF THE ETIOLOGIC AGENT OF SPOTTED FEVER RICKETTSIOSIS	All currently available assays for antibodies to the etiologic agents of spotted fever group rickettsioses detect reactivity with antigens of lipopolysaccharides and the major cell wall proteins, which contain epitopes that are shared among many spotted fever group rickettsiae. The hypothesis of this study was that a monoclonal antibody to a species-specific epitope of Rickettsia rickettsii would…	1993	No									Radulovic, S, Speed, R, Feng, H M, Taylor, C, Walker, D H	THE JOURNAL OF INFECTIOUS DISEASES	168	5	1292-5	Antibodies, Bacterial, Antibodies, Monoclonal, Antibody Formation, B-Lymphocytes, Boutonneuse Fever, Convalescence, Epitopes, Humans, Immunodominant Epitopes, Immunoenzyme Techniques, Rocky Mountain Spotted Fever, Serologic Tests, Species Specificity		7693827	NA
COXIELLA BURNETII (Q FEVER) PNEUMONIA	Pneumonia is one manifestation of acute Q fever following infection with Coxiella burnetii. Fever, headache, and myalgia dominate the clinical picture of Q fever pneumonia. Cough is nonproductive and may be absent despite the presence of pneumonia. While in most instances pneumonia results in an illness of mild-to-moderate severity, on occasion it is rapidly progressive and results in respiratory…	1995	No									Marrie, TJ	CLINICAL INFECTIOUS DISEASES	21		S253-S264			8749674	NA
Q-FEVER (COXIELLA-BURNETII) RESERVOIR IN WILD BROWN-RAT (RATTUS-NORVEGICUS) POPULATIONS IN THE UK	Seroprevalence of Coxiella burnetii, the causal agent of Q fever in humans, was examined in wild brown rat populations from 4 Oxfordshire farmsteads (n = 127), 9 Somerset homesteads (n = 98), and 1 captive enclosure (n = 88) in the UK. Seroprevalence ranged between 7 and 53 %, the lowest being within the captive population and the highest on dairy farmsteads with sheep present. This is the first …	1995	No									WEBSTER, JP, LLOYD, G, MACDONALD, DW	PARASITOLOGY	110		31-35	Q FEVER, COXIELLA BURNETII, WILD RATS, CATS, AEROSOL TRANSMISSION		7845709	NA
A Q-FEVER PNEUMONIA EPIDEMIC IN DUSSELDORF	There was an unusually high incidence of atypical pneumonias in the catchment area of the Rhine river near the university of D��sseldorf in July 1994 during a long period of hot and dry weather. The 18 patients described in this paper (5 women and 13 men) complained of sudden onset of fever up to over 40 degrees C, often associated with severe headache and dry cough. Almost all of these patients …	1996	No									Schulze, K, Schwalen, A, Klein, R M, Thomas, L, Leschke, M, Strauer, B E	PNEUMOLOGIE (STUTTGART, GERMANY)	50	7	469-73	Adult, Aged, Animals, Antibodies, Coxiella burnetii, Cross-Sectional Studies, Disease Outbreaks, Doxycycline, Drug Therapy, Combination, Female, Germany, Humans, Incidence, Male, Middle Aged, Pneumonia, Rickettsial, Q Fever, Sheep, Zoonoses		8927605	NA
HIGH INCIDENCE OF COXIELLA BURNETII MARKERS IN A RURAL POPULATION IN FRANCE	Since Coxiella burnetii, the causative agent of Q fever, is often transmitted from goats and sheep to humans through aerosols, we examined the sera from 168 persons involved in goat breeding in the Centre region of France and 40 members of veterinary and medical staff from the same region for the presence of antibodies against C. burnetii. An immunofluorescence assay was used to detect the presen…	1996	No									Thibon, M, Villiers, V, Souque, KP, DautryVarsat, A, Duquesenl, R, Ojcius, DM	EUROPEAN JOURNAL OF EPIDEMIOLOGY	12	5	509-513	Coxiella burnetii, Q fever, rickettsiales	10.1007/BF00144005	8905314	NA
INVESTIGATION OF A Q-FEVER OUTBREAK IN NORTHERN ITALY	Objectives: A study was conducted to evaluate the extent of a Q-fever epidemic through active case finding in the area of Vicenza (northeastern Italy), and to identify risk factors for Q-fever in this outbreak. Methods: 1) Descriptive epidemiology; 2) Seroepidemiological survey; 3) Case-control study. 1) Epidemic curve and maps with the location of cases. Identification of the road followed by th…	1996	No									Selvaggi, TM, Rezza, G, Scagnelli, M, Rigoli, R, Rassu, M, DeLalla, F, Pellizzer, GP, Tramarin, A, Bettini, C, Zampieri, L, Belloni, M, DallaPozza, E, Marangon, S, Marchioretto, N, Togni, G, Giacobbo, M, Todescato, A, Binkin, N	EUROPEAN JOURNAL OF EPIDEMIOLOGY	12	4	403-408	Q-fever, outbreak investigation, case-control study		8891546	NA
STRATEGIES FOR THE PREVENTION OF A SUCCESSFUL BIOLOGICAL WARFARE AEROSOL ATTACK	Biological warfare (BW) aerosol attacks are different from chemical attacks in that they may provide no warning/all clear signals that allow the soldier to put on or remove his M17/M40 protective mask. Methods are now being perfected to detect a BW aerosol cloud using an airborne (helicopter) pulsed laser system to scan the lower altitudes upwind from a troop concentration of corps size, and to s…	1996	No									Wiener, S L	MILITARY MEDICINE	161	5	251-6	Aerosols, Bacterial Vaccines, Biological Warfare, Chemoprevention, Humans, Iraq, Military Personnel, Respiratory Protective Devices, United States		8855053	NA
A REVIEW OF Q FEVER IN AUSTRALIA 1991-1994	Q fever continues to be an important disease in Australia. Despite the development of an effective vaccine that has been commercially available since 1989, the number of cases notified has continued to increase. This study reviewed national notifications of Q fever between 1991 and 1994, together with demographic, socioeconomic and occupational information, to investigate temporal and spatial dis…	1997	No									Garner, MG, Longbottom, HM, Cannon, RM, Plant, AJ	AUSTRALIAN AND NEW ZEALAND JOURNAL OF PUBLIC HEALTH	21	7	722-730		10.1111/j.1467-842X.1997.tb01787.x	9489189	http://onlinelibrary.wiley.com/resolve/openurl?genre=article&sid=nlm:pubmed&issn=1326-0200&date=1997&volume=21&issue=7&spage=722
AN EXPLOSIVE OUTBREAK OF Q-FEVER IN JEDL'OV�� KOSTOL'ANY, SLOVAKIA	An explosive epidemic of Q-fever that occurred at Jedl'ov�� Kostol'any (Nitra District) in April 1993, had an unusual mode of transmission, unprecedented in Slovakia. The submitted case-reports can be very instructive for both health workers and the lay public. The bulk of infection was spread in the local pub through contaminated garments of animal attendants assisting abortions and births of go…	1997	No									Varga, V	CENTRAL EUROPEAN JOURNAL OF PUBLIC HEALTH	5	4	180-2	Adolescent, Adult, Age Distribution, Aged, Animal Technicians, Animals, Breeding, Clothing, Disease Outbreaks, Disease Reservoirs, Female, Goat Diseases, Goats, Humans, Incidence, Male, Middle Aged, Occupational Diseases, Population Surveillance, Q Fever, Slovakia		9457416	NA
COMPARATIVE EFFICACY OF A COXIELLA BURNETII CHLOROFORM:METHANOL RESIDUE (CMR) VACCINE AND A LICENSED CELLULAR VACCINE (Q-VAX) IN RODENTS CHALLENGED BY AEROSOL	Q fever is an acute and self-limited febrile illness caused by the obligate intracellular bacterium Coxiella burnetii. While phase I cellular Q fever vaccines are efficacious in humans, vaccination of immune individuals may result in sterile abscesses and granulomas. The chloroform:methanol residue vaccine (CMR) was developed as a safer alternative. The efficacy of a licensed phase I cellular vac…	1997	No									Waag, DM, England, MJ, Pitt, MLM	VACCINE	15	16	1779-1783	C-burnetii vaccine, Q fever, vaccine efficacy	10.1016/S0264-410X(97)00107-2	9364683	https://linkinghub.elsevier.com/retrieve/pii/S0264-410X(97)00107-2
Q FEVER ENDOCARDITIS IN ISRAEL AND A WORLDWIDE REVIEW	The worldwide epidemiology and population-based incidence of Q fever endocarditis (QFE) have been less well studied than those for uncomplicated Q fever. An exhaustive literature review revealed 408 patients with QFE reported between 1949 and 1994, mostly from 3 large geographic areas. Underlying valvular heart disease was almost invariably present, and 38% had prosthetic valves. The most common …	1997	No									Siegman-Igra, Y, Kaufman, O, Keysary, A, Rzotkiewicz, S, Shalit, I	SCANDINAVIAN JOURNAL OF INFECTIOUS DISEASES	29	1	41-9	Adult, Aged, Anti-Bacterial Agents, Antibodies, Bacterial, Coxiella burnetii, Drug Therapy, Combination, Endocarditis, Bacterial, Female, Heart Valve Diseases, Humans, Immunoglobulin G, Immunoglobulin M, Israel, Male, Middle Aged, Q Fever		9112297	NA
Q-FEVER IMPORTED INTO NORWAY	Q fever is an important zoonosis that occurs throughout the world. In contrast to most other European countries, there has been no evidence of endemic Q fever in Norway up to now. The disease is caused by Coxiella burnetii, a rickettsia-like bacterium. Humans are infected mainly by inhalation of contaminated aerosols from cattle, sheep and goats. Clinical manifestations are protean, ranging from …	1997	No									Jensenius, M, Maeland, A, Kvale, D, Farstad, I N, Vene, S, Bruu, A L	TIDSSKRIFT FOR DEN NORSKE LAEGEFORENING : TIDSSKRIFT FOR PRAKTISK MEDICIN, NY RAEKKE	117	27	3937-40	Aged, Animals, Cattle, Endocarditis, Bacterial, Goats, Humans, Male, Middle Aged, Norway, Q Fever, Sheep, Tetracyclines, Travel, Treatment Outcome, Zoonoses		9441420	NA
STUDY OF THE 16S-23S RIBOSOMAL DNA INTERNAL SPACER OF COXIELLA BURNETII	The complete 16S-23S ribosomal DNA (rDNA) internal transcribed spacer (ITS) of 22 isolates of the obligate intracellular bacterium Coxiella burnetii, the agent of Q fever, were amplified by the polymerase chain reaction (PCR) and sequenced using an automated laser fluorescent DNA sequencer. The ITS measured 497 base pairs (bp) and encoded isoleucine-tRNA and alanine-tRNA. The comparison of the se…	1997	No									Stein, A, Kruszewska, D, Gouvernet, J, Raoult, D	EUROPEAN JOURNAL OF EPIDEMIOLOGY	13	4	471-5	Animals, Base Sequence, Coxiella burnetii, DNA, Bacterial, DNA, Ribosomal, Humans, Molecular Epidemiology, Molecular Sequence Data, Phenotype, Polymerase Chain Reaction, RNA, Ribosomal, 16S, RNA, Ribosomal, 23S, Reproducibility of Results, Sequence Alignment, Sequence Analysis, DNA		9258555	NA
AN OUTBREAK OF SHEEP-ASSOCIATED Q FEVER IN A RURAL COMMUNITY IN GERMANY	In spring 1996, an outbreak of Q fever occurred among residents of a rural town (population: 300) in Germany. A retrospective cohort study was conducted to ascertain the extent of the outbreak and to assess potential risk factors for illness. In July 1996, all residents greater than or equal to 15 years received a self-administered questionnaire and were offered Coxiella burnetii antibody testing…	1998	No									Lyytikainen, O, Ziese, T, Schwartlander, B, Matzdorff, P, Kuhnhen, C, Jager, C, Petersen, L	EUROPEAN JOURNAL OF EPIDEMIOLOGY	14	2	193-199	cohort study, Coxiella burnetii, outbreak investigation, Q fever	10.1023/A:1007452503863	9556180	NA
DIFFERENTIATION OF COXIELLA BURNETII ISOLATES BY SEQUENCE DETERMINATION AND PCR-RESTRICTION FRAGMENT LENGTH POLYMORPHISM ANALYSIS OF ISOCITRATE DEHYDROGENASE GENE	The isocitrate dehydrogenase (icd) gene of Coxiella burnetii was cloned and sequenced to differentiate between isolates with various geographic origins and phenotypic properties. Based on the gene sequences all 19 isolates studied could be divided into three groups. Group 1 contained isolates originating from acute cases of Q fever, ticks and cows. Groups 2 and 3 included isolates from chronic Q …	1999	No									Van Nguyen, S, Hirai, K	FEMS MICROBIOLOGY LETTERS	180	2	249-254	Q fever, Coxiella burnetii, isocitrate dehydrogenase, icd gene, polymerase chain reaction-restriction fragment length polymorphism		NA	NA
EVALUATION OF CYNOMOLGUS (MACACA FASCICULARIS) AND RHESUS (MACACA MULATTA) MONKEYS AS EXPERIMENTAL MODELS OF ACUTE Q FEVER AFTER AEROSOL EXPOSURE TO PHASE-I COXIELLA BURNETII	Background and Purpose: Q fever is a disease of humans. Vaccines to prevent this disease have demonstrated efficacy in rodents and must also be evaluated for efficacy in a nonhuman primate model. Preliminary to vaccine efficacy experiments, cynomolgus and rhesus monkeys were evaluated as suitable experimental models of acute Q fever. Methods: Both species of monkeys were challenged with aerosoliz…	1999	No									Waag, DM, Byrne, WR, Estep, J, Gibbs, P, Pitt, MLM, Banfield, CM	LABORATORY ANIMAL SCIENCE	49	6	634-638			10638499	NA
HYPERENDEMIC FOCUS OF Q FEVER RELATED TO SHEEP AND WIND	Q fever is a worldwide zoonosis which is caused by Coxiella burnetii and presents as both acute or chronic cases. The disease can be transmitted from animal reservoirs to humans by the inhalation of infected aerosols. The authors investigated the epidemiology of Q fever in the Bouches-du-Rhone district of southern France. The study area was centered around the small town of Martigues near the cit…	1999	No									Tissot-Dupont, H, Torres, S, Nezri, M, Raoult, D	AMERICAN JOURNAL OF EPIDEMIOLOGY	150	1	67-74	Coxiella burnetii, disease outbreaks, Q fever		10400556	NA
ACUTE AND CHRONIC Q FEVER; EPIDEMIOLOGY, SYMPTOMS, DIAGNOSIS AND THERAPY OF INFECTION CAUSED BY COXIELLA BURNETII	Q fever is a zoonosis caused by Coxiella burnetii, an obligate intracellular bacterium. Domestic ungulates and parturient cats are the primary reservoirs of infection. The animals excrete the bacterium in urine, faeces, milk and amniotic fluid. After desiccation the micro-organism spreads via aerosols. After inhalation or ingestion and an incubation period of 2-6 weeks acute Q fever may develop w…	2000	No									Bartelink, A K, Stevens, H, van Kregten, E, Meijer, J G, Beeres, M P, van Deuren, M	NEDERLANDS TIJDSCHRIFT VOOR GENEESKUNDE	144	27	1303-6	Acute Disease, Animals, Anti-Bacterial Agents, Antibodies, Bacterial, Chronic Disease, Coxiella burnetii, Diagnosis, Differential, Endocarditis, Bacterial, Fluorescent Antibody Technique, Indirect, Humans, Netherlands, Q Fever, Zoonoses		10918908	NA
COXIELLA BURNETII PNEUMOPATHY ON RETURN FROM FRENCH GUIANA	Q fever is a worldwide zoonosis but is not often a common cause of fever among travellers returning from the tropics. We report a case of acute Q fever, revealed by a pneumonia and acquired by a traveller in French Guyana. The chest radiography showed alveolar opacities and pleural effusion. Biological abnormalities were elevated liver enzyme levels and thrombocytopenia. The patient improved or t…	2000	No									Baret, M, Klement, E, Dos Santos, G, Jouan, M, Bricaire, F, Caumes, E	BULLETIN DE LA SOCIETE DE PATHOLOGIE EXOTIQUE (1990)	93	5	325-7	Adult, Animals, Animals, Domestic, Dogs, Female, France, French Guiana, Goats, Humans, Pneumonia, Bacterial, Q Fever, Travel, Zoonoses		11775317	NA
GUINEA PIG ABSCESS/HYPERSENSITIVITY MODEL FOR STUDY OF ADVERSE VACCINATION REACTIONS INDUCED BY USE OF Q FEVER VACCINES	Background and Purpose: The Coxiella burnetii phase-I cellular vaccine is efficacious in humans, imparting nearly complete protection against Q fever. However, this vaccine can also induce sterile abscesses and granulomas at the inoculation site in humans previously sensitized by natural infection or vaccination. To decrease the possibility of vaccinating immune persons, vaccinees are currently s…	2000	No									Wilhelmsen, CL, Waag, DM	COMPARATIVE MEDICINE	50	4	374-378			11020154	https://www.ingentaconnect.com/openurl?genre=article&issn=1532-0820&volume=50&issue=4&spage=374&aulast=Wilhelmsen
IMMUNIZATION AGAINST POTENTIAL BIOLOGICAL WARFARE AGENTS	The intentional release of biological agents by belligerents or terrorists is a possibility that has recently attracted increased attention. Law enforcement agencies, military planners, public hearth officials, and clinicians are gaining an increasing awareness of this potential threat. From a military perspective, an important component of the protective pre-exposure armamentarium against this t…	2000	No									Cieslak, TJ, Christopher, GW, Kortepeter, MG, Rowe, JR, Pavlin, JA, Culpepper, RC, Eitzen, EM	CLINICAL INFECTIOUS DISEASES	30	6	843-850		10.1086/313812	10880299	https://academic.oup.com/cid/article-lookup/doi/10.1086/313812
ANIMAL Q FEVER EPIDEMIOLOGY. SITUATION IN FRANCE.	Q fever is a worldwide zoonosis caused by Coxiella burnetii, an obligate intracellular bacterium that lives in its host's phagocytic cells and can survive outside the cell. A variety of animals and arthropods can be infected, and the common reservoirs are cattle, sheep and goats. Animals seem rarely to develop illness from a Coxiella infection, but shed the bacteria in urine, feces, milk and espe…	2001	No									Rousset, E, Russo, P, Pepin, M, Raoult, D	MEDECINE ET MALADIES INFECTIEUSES	31		233S-246S	infective aerosols, Coxiella burnetii, Q fever, ruminant, zoonosis		NA	NA
OUTBREAK OF Q FEVER AND SEROPREVALENCE IN A RURAL TOWN FROM SORIA	BACKGROUND. The aim of this study was to describe an outbreak of acute Q fever in a rural town from Soria (Spain) in the spring of 1998 and to know the prevalence of IgG antibodies to Coxiella burnetii in this population. METHODS. 1. Outbreak of Q fever: epidemiological, clinical and analytical data were obtained by standardised questionnaire and the clinical records from all clinical cases. Thes…	2001	No									Nebreda, T, Contreras, E, Merino, FJ, Dodero, E, Campos, A	ENFERMEDADES INFECCIOSAS Y MICROBIOLOGIA CLINICA	19	2	57-60	Q fever, outbreak, seroprevalence		11333569	NA
Q FEVER PNEUMONIAE FOLLOWING A TRIP IN FRENCH GUYANA	Q fever is a worldwide zoonosis but is not often a common cause of fever among travellers returning from the tropics. We report a case of acute Q fever revealed by a pneumonia and acquired by a traveller in French Guyana. The chest radiography showed alveolar opacities and pleural effusion. Biological abnormalities were elevated liver enzyme levels and thrombocytopenia. The patient improved or th…	2001	No									Baret, M, Klement, E, Dos Santos, G, Jouan, M, Bricaire, E, Caumes, E	BULLETIN DE LA SOCIETE DE PATHOLOGIE EXOTIQUE	93	5	325-327	Q fever, Coxiella burnetii, pneumoniae, travel, French Guyana, South America		NA	NA
SUBURBAN TRANSMISSION OF Q FEVER IN FRENCH GUIANA: EVIDENCE OF A WILD RESERVOIR	The annual incidence of Q fever in French Guiana was found to have increased in 1996 and was 37/100,000 population over the last 4 years. Subsequent investigations in Cayenne and its suburbs indicated that a wild reservoir of the bacteria was responsible for the epidemiologic pattern. A case-control study showed that residence near a forest and occupations and activities that result in exposure t…	2001	No									Gardon, J, Heraud, JM, Laventure, S, Ladam, A, Capot, P, Fouquet, E, Favre, J, Weber, S, Hommel, D, Hulin, A, Couratte, Y, Talarmin, A	JOURNAL OF INFECTIOUS DISEASES	184	3	278-284		10.1086/322034	11443552	https://academic.oup.com/jid/article-lookup/doi/10.1086/322034
TICKS AND TICKBORNE BACTERIAL DISEASES IN HUMANS: AN EMERGING INFECTIOUS THREAT	Ticks are currently considered to be second only to mosquitoes as vectors of human infectious diseases in the world. Each tick species has preferred environmental conditions and biotopes that determine the geographic distribution of the ticks and, consequently, the risk areas for tickborne diseases. This is particularly the case when ticks are vectors and reservoirs of the pathogens. Since the id…	2001	No									Parola, P, Didier, R	CLINICAL INFECTIOUS DISEASES	32	6	897-928		10.1086/319347	11247714	https://academic.oup.com/cid/article-lookup/doi/10.1086/319347
BACTERIAL PATHOGENS AS BIOLOGICAL WEAPONS AND AGENTS OF BIOTERRORISM	Bacterial pathogens have been identified as agents that have been, or could be, used as weapons of biological warfare and/or biological terrorism. These agents are relatively easily obtained, prepared, and dispersed, either as weapons of mass destruction or for more limited terrorist attacks. Although phylogenetically diverse, these agents all have the potential for aerosol dissemination. Physici…	2002	No									Greenfield, RA, Drevets, DA, Machado, LJ, Voskuhl, GW, Bronze, MS	AMERICAN JOURNAL OF THE MEDICAL SCIENCES	323	6	299-315	anthrax, bioterrorism, brucellosis, glanders, melioidosis, plague, Q fever, tularemia	10.1097/00000441-200206000-00003	12074485	https://linkinghub.elsevier.com/retrieve/pii/S0002-9629(15)34446-3
BIOLOGICAL TERRORISM: UNDERSTANDING THE THREAT, PREPARATION, AND MEDICAL RESPONSE	The thought of an outbreak of disease caused by the intentional release of a pathogen or toxin in an American city was alien just 10 years ago. Many people believed that biological warfare was only in the military's imagination, perhaps to be faced by soldiers on a far-away battlefield, if at all. The "anthrax letters" and the resulting deaths from inhalation anthrax have changed that perception.…	2002	No									Franz, DR, Zaitchuk, R	DM DISEASE-A-MONTH	48	8	493-564		10.1067/mda.2002.129453	12429949	https://linkinghub.elsevier.com/retrieve/pii/S001150290250078X
COMPARATIVE EFFICACY AND IMMUNOGENICITY OF Q FEVER CHLOROFORM: METHANOL RESIDUE (CMR) AND PHASE I CELLULAR (Q-VAX) VACCINES IN CYNOMOLGUS MONKEYS CHALLENGED BY AEROSOL	Preliminary evidence gathered in rodents and livestock suggested that a phase I chloroform: methanol residue (CMR) extracted vaccine was safe and efficacious in protecting these animals from challenge with the obligate phagolysosomal pathogen (Coxiella burnetii). Prior to the initiation of phase 11 studies in human volunteers, we compared, in non-human primates (Macaca fascicularis), the efficacy…	2002	No									Waag, DM, England, MJ, Tammariello, RF, Byrne, WR, Gibbs, P, Banfield, CM, Pitt, MLM	VACCINE	20	19-20	2623-2634	Q fever, vaccine, immunity	10.1016/S0264-410X(02)00176-7	12057622	https://linkinghub.elsevier.com/retrieve/pii/S0264410X02001767
GASTROINTESTINAL AND HEPATIC MANIFESTATIONS OF TICKBORNE DISEASES IN THE UNITED STATES	Signs and symptoms related to the gastrointestinal tract and liver may provide important clues for the diagnosis of various tickborne diseases prevalent in different geographic areas of the United States. We review clinical and laboratory features that may be helpful in detecting a tickborne infection. Physicians evaluating patients who live in or travel to areas where tickborne diseases are ende…	2002	No									Zaidi, Syed Ali, Singer, Carol	CLINICAL INFECTIOUS DISEASES : AN OFFICIAL PUBLICATION OF THE INFECTIOUS DISEASES SOCIETY OF AMERICA	34	9	1206-12	Babesiosis, Colorado Tick Fever, Ehrlichiosis, Gastrointestinal Diseases, Humans, Liver Diseases, Lyme Disease, Q Fever, Tick-Borne Diseases, Tularemia, United States	10.1086/339871	11941547	https://academic.oup.com/cid/article-lookup/doi/10.1086/339871
INTERLEUKIN-2 LIPOSOMES FOR PRIMARY IMMUNE DEFICIENCY USING THE AEROSOL ROUTE	This is the first report of aerosol interleukin 2 (IL-2) liposome administration to individuals with immune deficiency. Parenteral IL-2 therapy has shown beneficial effects in some patients with cancer, common variable immunodeficiency (CVID), and human immunodeficiency vir-us (HIV) but is problematic because of side effects including fever and malaise as well as local swelling (delayed type hype…	2002	No									Ten, RM, Anderson, PM, Zein, NN, Temesgen, Z, Clawson, ML, Weiss, W	INTERNATIONAL IMMUNOPHARMACOLOGY	2	2-3	333-344	interleukin-2, common variable immune deficiency, liposomes, aerosol, lung	10.1016/S1567-5769(01)00143-6	11811936	https://linkinghub.elsevier.com/retrieve/pii/S1567-5769(01)00143-6
ISOLATION OF COXIELLA BURNETII BY A CENTRIFUGATION SHELL-VIAL ASSAY FROM TICKS COLLECTED IN CYPRUS: DETECTION BY NESTED POLYMERASE CHAIN REACTION (PCR) AND BY PCR-RESTRICTION FRAGMENT LENGTH POLYMORPHISM ANALYSES	Ticks are the principal vectors and reservoirs of Coxiella burnetii. The identification of isolates is necessary for understanding the clinical diversity of Q fever in different geographic areas. This is the first report of isolation of C. burnetii from ticks by the shell-vial assay and by nested polymerase chain reaction (PCR) assay for the detection of this pathogen in ticks. Of 141 ticks colle…	2002	No									Spyridaki, Ioanna, Psaroulaki, Anna, Loukaides, Fidias, Antoniou, Maria, Hadjichristodolou, Christos, Tselentis, Yannis	THE AMERICAN JOURNAL OF TROPICAL MEDICINE AND HYGIENE	66	1	86-90	Animals, Arachnid Vectors, Coxiella burnetii, Cyprus, DNA, Bacterial, Hemolymph, Humans, Polymerase Chain Reaction, Polymorphism, Restriction Fragment Length, Ticks		12135275	http://www.ajtmh.org/cgi/pmidlookup?view=long&pmid=12135275
LONG-TERM FOLLOW-UP OF PATIENTS FROM THE 1989 Q FEVER OUTBREAK: NO EVIDENCE OF EXCESS CARDIAC DISEASE IN THOSE WITH FATIGUE	Background: In 1989, an outbreak of Q fever (C. burnetii infection) with 147 confirmed cases occurred in Solihull, West Midlands. Three patients developed cardiomyopathy in the subsequent 10 years. The cohort has been followed up with respect to the development of fatigue and, in this instance, cardiac effects after the original infection. Aim: To determine whether persisting fatigue after Q feve…	2002	No									Ayres, JG, Wildman, M, Groves, J, Ment, J, Smith, EG, Beattie, JM	QJM-AN INTERNATIONAL JOURNAL OF MEDICINE	95	8	539-546		10.1093/qjmed/95.8.539	12145393	NA
MICROBIAL WARFARE AND BIOTERRORISM	Infectious diseases have been used as warfares since ancient times. Since the 1920s military organizations have studied bacteria of anthrax, plague, tularemia, botulism, brucelloses, glander, Q-fever, and smallpox virus, Filo-, Arena-, Bunyaviruses causing hemorrhagic fever or Alphaviruses eliciting encephalitis. These can be dispersed by aerosol. Salmonellae, Shigellae, Vibrio cholerae, distingu…	2002	No									Ongr��di, J��zsef	ORVOSI HETILAP	143	33	1935-9	Animals, Bacterial Infections, Biological Warfare, Bioterrorism, Communicable Diseases, Disaster Planning, Disease Outbreaks, Drug Resistance, Microbial, Humans, Virus Diseases		12244657	NA
Q FEVER - STILL A QUERY AND UNDERESTIMATED INFECTIOUS DISEASE	Coxiella burnetii (C.b.) is a strictly intracellular, Gram-negative bacterium. It causes Q fever in humans and animals worldwide. The animal Q fever is sometimes designated "coxiellosis". This infection has many different reservoirs including arthropods, birds and mammals. Domestic animals and pets, are the most frequent source of human infections. Q fever may appear basically in two forms, acute…	2002	No									Kovacova, E, Kazar, J	ACTA VIROLOGICA	46	4	193-210	Q fever, epidemiology, clinical presentation, pathogenesis, immunity, diagnosis, treatment, prevention		12693856	NA
Q FEVER IN CHILDREN	Q fever is a zoonosis caused by Coxiella burnetii. Farm animals and pets are the main reservoirs of infection, and transmission to human beings is mainly accomplished through inhalation of contaminated aerosols. This illness is associated with a wide clinical spectrum, from asymptomatic or mildly symptomatic seroconversion to fatal disease. Q fever in children has been rarely reported. We reviewe…	2002	No									Maltezou, HC, Raoult, D	LANCET INFECTIOUS DISEASES	2	11	686-691		10.1016/S1473-3099(02)00440-1	12409049	https://linkinghub.elsevier.com/retrieve/pii/S1473309902004401
Q FEVER IN HUMANS AND ANIMALS IN THE UNITED STATES	Coxiella burnetii, the etiologic agent of Q fever, is a worldwide zoonotic pathogen. Although Q fever is present in the United States, little is known about its current incidence or geographic distribution in either humans or animals. Published reports of national disease surveillance, individual cases, outbreak investigations, and serologic surveys were reviewed to better characterize Q fever ep…	2002	No									Mcquiston, JH, Childs, JE	VECTOR-BORNE AND ZOONOTIC DISEASES	2	3	179-+	Coxiella burnetii, Q fever, Epidemiology, Surveillance	10.1089/15303660260613747	12737547	http://dx.doi.org/10.1089/15303660260613747
Q FEVER--CALIFORNIA, GEORGIA, PENNSYLVANIA, AND TENNESSEE, 2000-2001	Q fever is a zoonotic disease caused by the bacterium Coxiella burnetii. The most common reservoirs are domesticated ruminants, primarily cattle, sheep, and goats. Humans acquire Q fever typically by inhaling aerosols or contaminated dusts derived from infected animals or animal products. Its highly infectious nature and aerosol route of transmission make C. burnetii a possible agent of bioterror…	2002	No										MMWR. MORBIDITY AND MORTALITY WEEKLY REPORT	51	41	924-7	Aged, Aged, 80 and over, Animal Husbandry, California, Female, Georgia, Humans, Male, Middle Aged, Pennsylvania, Q Fever, Tennessee		12403408	NA
Q-FEVER, HUMAN AND ANIMAL MORBIDITY IN SOME REGIONS OF BOSNIA AND HERZEGOVINA, IN 2000	Q-Fever is a worldwide zoonosis caused by Coxiella burnetti. C. burnetti is an obligate intracellular parasite. It lives in phagolysosome of the host cell. By its infection of the sensitive persons develops the acute noncharacteristic disease, which passes noncharacteristically, with the appearance of higher temperature, headache, fever, weakness of the organism or by the appearance of symptoms o…	2002	No									Zvizdi��, Sukrija, Bajrovi��, Tarik, Beslagi��, Edina, Puvaci��, Sandra, Veli��, Ramiz, Maglajlia, Jasminka, Hamzi��, Sadeta, Kapi��, Elvedina, Zvizdi��, Amra	MEDICINSKI ARHIV	56	3	131-3	Animals, Bosnia and Herzegovina, Cattle, Cattle Diseases, Goat Diseases, Goats, Humans, Q Fever, Seroepidemiologic Studies, Sheep, Sheep Diseases		12378856	NA
BACTERIAL AGENTS USED FOR BIOTERRORISM	Bacterial pathogens and their products are potential agents of biological terrorism and biological warfare. These agents can be deployed through simple aerosol delivery systems and thereby cause widespread disease and death., This report is a review of bacterial species that have been employed for development of biological terrorism, relying on a system for classification of their threat develope…	2003	No									Horn, Jan K	SURGICAL INFECTIONS	4	3	281-7	Animals, Anthrax, Biological Warfare, Bioterrorism, Brucellosis, Glanders, Humans, Melioidosis, Plague, Q Fever, Tularemia, United States	10.1089/109629603322419625	14588163	http://dx.doi.org/10.1089/109629603322419625
COXIELLA BURNETII PNEUMONIA	This report reviews the pulmonary and extrapulmonary manifestation of infections due to Coxiella burnetii. Q fever, a zoonosis, is due to infection with C. burnetii. This spore-forming microorganism is a small Gram-negative coccobacillus that is an obligate intracellular parasite. The most common animal reservoirs are goats, cattle, sheep, cats, and occasionally dogs. The organism reaches high co…	2003	No									Marrie, TJ	EUROPEAN RESPIRATORY JOURNAL	21	4	713-719	cats, epidemiology, pneumonia, Q fever, treatment, zoonosis	10.1183/09031936.03.00099703	12762362	http://erj.ersjournals.com/cgi/pmidlookup?view=long&pmid=12762362
COXIELLA BURNETTI AVOIDS MACROPHAGE PHAGOCYTOSIS BY INTERFERING WITH SPATIAL DISTRIBUTION OF COMPLEMENT RECEPTOR 3	Phagocytosis is a highly localized event requiring the formation of spatially and temporally restricted signals. Numerous microorganisms have taken advantage of this property to invade host cells. Coxiella burnetti, the agent of Q fever, is an obligate intracellular bacterium that has developed a survival strategy in macrophages based on subversion of receptor-mediated phagocytosis. The uptake of…	2003	No									Capo, C, Moynault, A, Collette, Y, Olive, D, Brown, EJ, Raoult, D, Mege, JL	JOURNAL OF IMMUNOLOGY	170	8	4217-4225			12682255	http://www.jimmunol.org/cgi/pmidlookup?view=long&pmid=12682255
PROBABILISTIC EVALUATION OF ASPIRATING DOSES OF A Q FEVER PATHOGEN	The process of biological aerosol penetration into respiratory organs is connected with the estimation of the amount of an aspiration dose of microorganisms (D) a human gets in the center of infection. Here we submit a probabilistic model describing the process of hits of a Q fever pathogen in a human respiratory tract. This approach makes it possible to get qualitatively different probabilistic …	2003	No									Vorobeychikov, EV, Kurtzer, GM, Vasilenko, AZ, Misnikov, OP	RICKETTSIOLOGY: PRESENT AND FUTURE DIRECTIONS	990		743-750	aerosol, aspiration dose, Coxiella burnetii, probabilistic model		12860717	http://onlinelibrary.wiley.com/resolve/openurl?genre=article&sid=nlm:pubmed&issn=0077-8923&date=2003&volume=990&spage=743
Q FEVER IN GRAN CANARIA: 40 NEW CASES	The aim of this study was to describe the clinical and epidemiologic features of Q fever in the southern area of the island of Gran Canaria (Spain)., We conducted a retrospective analysis of the clinical and epidemiological data of the cases of Q fever diagnosed by the Microbiology Laboratory of the Hospital Universitario Insular in Gran Canaria between 1998 and 2000. Antibodies against phase II …	2003	No									Bola��os, Margarita, Santana, Otilia-Evora, P��rez-Arellano, Jos�� Luis, Angel-Moreno, Alfonso, Moreno, Gustavo, Burgazzoli, Juan Luis, Mart��n-S��nchez, Antonio Manuel	ENFERMEDADES INFECCIOSAS Y MICROBIOLOGIA CLINICA	21	1	20-3	Adult, Aged, Animals, Anti-Bacterial Agents, Blood Sedimentation, Coxiella burnetii, Doxycycline, Female, Fever, Hepatitis, Humans, Incidence, Male, Middle Aged, Partial Thromboplastin Time, Prevalence, Q Fever, Retrospective Studies, Spain		12550040	https://linkinghub.elsevier.com/retrieve/pii/13042133
Q FEVER OUTBREAK DURING THE CZECH ARMY DEPLOYMENT IN BOSNIA	An epidemic of 9 fever was identified among soldiers from the Czech Republic serving in the U.N. Stabilization Force in Bosnia and Herzogovina in 1997. There were 26 serologically confirmed infections, or 4.6% of those exposed. There were 14 cases of febrile illness and 12 subclinical. infections. Prodromal symptoms of malaise, headache, backache, and fatigue were followed by fever greater than o…	2003	No									Splino, M, Beran, J, Chlibek, R	MILITARY MEDICINE	168	10	840-842			14620651	NA
Q FEVER: EPIDEMIOLOGY, CLINICAL FEATURES AND PROGNOSIS. A STUDY FROM 1983 TO 1999 IN THE SOUTH OF SPAIN	Objectives. Clinical potymorphism is a main feature of Q fever and, depending upon the geographic location, differences in its clinical picture have been described. The objective of this study was to determine the epidemiology, clinical features and prognosis of acute Q fever in our area. Methods. From 1985 to 1999, consecutive cases of Q fever, presented as febrile syndrome and attended in a ter…	2003	No									de Alarcon, A, Villanueva, JL, Viciana, P, Lopez-Cortes, L, Torronteras, R, Bernabeu, M, Cordero, E, Pachon, J	JOURNAL OF INFECTION	47	2	110-116	Q fever, epidemiology, prognosis	10.1016/S0163-4453(03)00013-6	12860143	https://linkinghub.elsevier.com/retrieve/pii/S0163445303000136
THE ASCENDANCY OF AMBLYOMMA AMERICANUM AS A VECTOR OF PATHOGENS AFFECTING HUMANS IN THE UNITED STATES	Until the 1990s, Amblyomma americanum was regarded primarily as a nuisance species, but a tick of minor importance as a vector of zoonotic pathogens affecting humans. With the recent discoveries of Ehrlichia chaffeensis, Ehrlichia ewingii, and "Borrelia lonestari," the public health relevance of lone star ticks is no longer in question. During the next 25 years, the number of cases of human disea…	2003	No									Childs, James E, Paddock, Christopher D	ANNUAL REVIEW OF ENTOMOLOGY	48		307-37	Animals, Animals, Domestic, Animals, Wild, Borrelia, Borrelia Infections, Coxiella burnetii, Deer, Disease Reservoirs, Ehrlichia, Ehrlichiosis, Francisella tularensis, Humans, Insect Vectors, Ixodidae, Q Fever, Tularemia, United States, Zoonoses	10.1146/annurev.ento.48.091801.112728	12414740	http://arjournals.annualreviews.org/doi/full/10.1146/annurev.ento.48.091801.112728?url_ver=Z39.88-2003&rfr_id=ori:rid:crossref.org&rfr_dat=cr_pub%3dpubmed
BICHAT GUIDELINES FOR THE CLINICAL MANAGEMENT OF Q FEVER AND BIOTERRORISM-RELATED Q FEVER	Q fever is a zoonotic disease caused by Coxiella burnetii. Its interest as a potential biological weapon stems from the fact that an aerosol of very few organisms could infect humans. Another route of transmission of C. burnetii could be through adding it to the food supply. Nevertheless, C. burnetii is considered to be one of the less suitable candidate agents for use in a bioterrorist attack; t…	2004	No									Bossi, Philippe, Tegnell, Anders, Baka, Agoritsa, Van Loock, Frank, Hendriks, Jan, Werner, Albrecht, Maidhof, Heinrich, Gouvras, Georgios	EURO SURVEILLANCE : BULLETIN EUROPEEN SUR LES MALADIES TRANSMISSIBLES = EUROPEAN COMMUNICABLE DISEASE BULLETIN	9	12	E19-20	Bioterrorism, Communicable Disease Control, Disease Outbreaks, Europe, European Union, Humans, Population Surveillance, Practice Guidelines as Topic, Q Fever		15677840	NA
Q FEVER PNEUMONIA	Purpose of review In this era of emerging infectious diseases and bioterrorism it is important to be up to date with the diagnosis and management of Q fever pneumonia. Recent findings A considerable amount of new information has emerged regarding the pathogenesis of Coxiella burnetii infection. The complete genome of this microorganism has now been sequenced and there are several unique features.…	2004	No									Marrie, TJ	CURRENT OPINION IN INFECTIOUS DISEASES	17	2	137-142	pneumonia, Coxiella burnetii, treatment, chronic fatigue	10.1097/01.qco.0000124369.27345.fe	15021054	http://Insights.ovid.com/pubmed?pmid=15021054
WIND IN NOVEMBER, Q FEVER IN DECEMBER	Q fever, a worldwide zoonosis caused by Coxiella burnetii, can be transmitted from animal reservoirs to humans by the inhalation of infected aerosols. We investigated the epidemiology of Q fever in the Bouches-du-Rhone district of southern France, particularly the role of wind and rainfall in C. burnetii transmission. During the winter of 1998 to 1999, an unexpected number of cases were diagnosed…	2004	No									Tissot-Dupont, H, Amadei, MA, Nezri, M, Raoult, D	EMERGING INFECTIOUS DISEASES	10	7	1264-1269			15324547	https://www.cdc.gov/ncidod/EID/vol10no7/03-0724.htm
A PEDAGOGICAL FARM AS A SOURCE OF Q FEVER IN A FRENCH CITY	Q fever is a worldwide zoonosis caused by Coxiella burnetii and presents as both acute or chronic cases. The disease can be transmitted from animal reservoirs to humans by inhalation of infected aerosols. A previous study had revealed a hyperendemic focus in South France. A case-control study was carried-out in this area from 1996 to 1999. Besides the role of wind, this study stressed out the exp…	2005	No									Tissot-Dupont, H, Amadei, MA, Nezri, M, Raoult, D	EUROPEAN JOURNAL OF EPIDEMIOLOGY	20	11	957-961	Coxiella burnetii, epidemiology, human, pedagogical farm, Q fever, transmission	10.1007/s10654-005-2336-5	16284874	https://www.springerlink.com/openurl.asp?genre=article&issn=0393-2990&volume=20&issue=11&spage=957
BOVINE TICKS: BIOLOGY, DISTRIBUTION AND THEIR ROLE AS VECTORS	Five species of ticks are frequently found in cattle in metropolitan France: Ixodes ricinus, Dermacentor reticulatus, Haemophysalis punctata and Rhipicephalus bursa. Species recognition is based on direct observation and then on binocular microscope examination. The epidemiology of bovine tick-borne protozoosis is influenced by the biologic particular features, the biotopes, the seasons of activi…	2005	No									Chauvet, S, L'Hostis, M	POINT VETERINAIRE	36	255	22-+			NA	NA
COXIELLA BURNETII GENOTYPING	Coxiella burnetii is a strict intracellular bacterium with potential as a bioterrorism agent. To characterize different isolates of C. burnetii at the molecular level, we performed multispacer sequence typing (MST). MST is based on intergenic region sequencing. These regions are potentially variable since they are subject to lower selection pressure than the adjacent genes. We screened 68 spacers…	2005	No									Glazunova, O, Roux, V, Freylikman, O, Sekeyova, Z, Fournous, G, Tyczka, J, Tokarevich, N, Kovacava, E, Marrie, TJ, Raoult, D	EMERGING INFECTIOUS DISEASES	11	8	1211-1217			16102309	https://www.cdc.gov/ncidod/EID/vol11no08/04-1354.htm
COXIELLA BURNETII INFECTION	Coxiella burnetii is an obligate intracellular bacterium that causes a worldwide zoonosis, Q fever, and can be misused as a biological warfare agent. Infection in animals (coxiellosis) is mostly persistent. Infection in humans is often asymptomatic, but it can manifest as an acute disease (usually a self-limited flu-like illness, pneumonia, or hepatitis) or as a chronic form (mainly endocarditis,…	2005	No									Kazar, J	RICKETTSIOSES: FROM GENOME TO PROTEOME, PATHOBIOLOGY, AND RICKETTSIAE AS AN INTERNATIONAL THREAT	1063		105-114	Coxiella burnetii, ticks, hosts, Q fever, epidemiology, pathogenesis, diagnosis, therapy, prevention, biological weapon	10.1196/annals.1355.018	16481501	http://onlinelibrary.wiley.com/resolve/openurl?genre=article&sid=nlm:pubmed&issn=0077-8923&date=2005&volume=1063&spage=105
COXIELLA BURNETII ISOLATED FROM THE AIR OF A SHEEP BARN WHEN SHEARED.	Local epidemics of Q fever occur sporadically in Germany, mainly in rural residential communities. There is increasing evidence that these outbreaks, which are caused by Coxiella burnetii, are related particularly to the lambing season and shearing periods of nearby sheep holdings. It is assumed that this zoonotic agent is massively emitted from the placenta of infected ewes at birth and during s…	2005	No									Schulz, J, Runge, M, Schroder, C, Ganter, M, Hartung, J	DEUTSCHE TIERARZTLICHE WOCHENSCHRIFT	112	12	470-472	Q fever, Coxiella burnetii, zoonosis, airborne transmission, sheep shearing		16425634	NA
EPIDEMIOLOGICAL INVESTIGATIONS TRANSMISSSION OF Q FEVER AMONG HUMANS IN BOSNIA AND HERZEGOVINA	Appearance of an acute disease by Coxiella burnetii in humans in Bosnia and Herzegovina is very big epidemiological problem because incidence rate is among the highest incidence rates in Europe. Incidence rate of Q fever in Federation Bosnia and Herzegovina was very high during 1998. year 5.68% and the highest in 2000, with 115 diseases with acute clinical form of the disease and incidence rate o…	2005	No									Puvaci��, Sandra, Dizdarevi��, Zehra, Zvizdi��, Sukrija, Tandir, Salih, Alikovi��, Ibrahim, Celiks, Sukrija	MEDICINSKI ARHIV	59	2	118-20	Acute Disease, Bosnia and Herzegovina, Chronic Disease, Disease Outbreaks, Humans, Incidence, Q Fever		15875477	NA
EVALUATION OF LOW CONCENTRATION AEROSOL FOR INFECTING HUMANS WITH THE Q FEVER PATHOGEN		2005	No									Vorobeychikov, E, Vasilenko, A, Tokarevich, N, Yakovleva, L, Nikolaev, B	RICKETTSIOSES: FROM GENOME TO PROTEOME, PATHOBIOLOGY, AND RICKETTSIAE AS AN INTERNATIONAL THREAT	1063		466-470	Q fever, modeling, aerosol, aspirating dose, infective dose	10.1196/annals.1355.067	16481561	http://onlinelibrary.wiley.com/resolve/openurl?genre=article&sid=nlm:pubmed&issn=0077-8923&date=2005&volume=1063&spage=466
IS Q FEVER AN EMERGING OR RE-EMERGING ZOONOSIS?	Q fever is a zoonotic disease considered as emerging or re-emerging in many countries. It is caused by Coxiella burnetii, a bacterium developing spore-like forms that are highly resistant to the environment. The most common animal reservoirs are livestock and the main source of infection is by inhalation of contaminated aerosols. Although the culture process for Coxiella is laborious, advances on…	2005	No									Arricau-Bouvery, N, Rodolakis, A	VETERINARY RESEARCH	36	3	327-349	Coxiella burnetii, epidemiology, bacteriology, diagnostic, control	10.1051/vetres:2005010	15845229	http://publications.edpsciences.org/10.1051/vetres:2005010
Q FEVER EPIDEMIC AMONG EMPLOYEES IN A FACTORY IN THE SUBURB OF ZADAR, CROATIA	Aim To examine the role of wind in the spread of Q fever (Coxiella burnetii) from the source of infection (sheep on the pastures) to the factory where there was an outbreak of Q fever among the employees. Methods We performed clinical (fever, coughing, myalgias, arthralgias), laboratory (complete blood test, aminotransferases, antibodies to Coxiella burnetii), radiographic (chest X-ray), and epid…	2005	No									Medic, A, Dzelalija, B, Polic, VP, Gjenero, I, Margan, IG, Turkovic, B, Gilic, V	CROATIAN MEDICAL JOURNAL	46	2	315-319			15849856	http://www.cmj.hr/2005/46/2/15849856.pdf
Q FEVER PNEUMONIA: VIRULENCE OF COXIELLA BURNETII PATHOVARS IN A MURINE MODEL OF AEROSOL INFECTION	Q fever is a worldwide zoonosis caused by Coxiella burnetii, a strictly intracellular bacterium that is a potential bioweapon. Humans usually acquires Q fever after inhalation of dust infected by subclinical animals. We used an aerosol exposure apparatus to challenge immunocompetent (BAILB/c) and severe combined immunodeficient (SCID) mice with two different strains (strain Nine Mile and strain Q…	2005	No									Stein, A, Louveau, C, Lepidi, H, Ricci, F, Baylac, P, Davoust, B, Raoult, D	INFECTION AND IMMUNITY	73	4	2469-2477		10.1128/IAI.73.4.2469-2477.2005	15784593	http://iai.asm.org/cgi/pmidlookup?view=long&pmid=15784593
SPECIFICITY OF LEGIONELLA PNEUMOPHILA AND COXIELLA BURNETII VACUOLES AND VERSATILITY OF LEGIONELLA PNEUMOPHILA REVEALED BY COINFECTION	Legionella pneumophila and Coxiella burnetii are phylogenetically related intracellular bacteria that cause aerosol-transmitted lung infections. In host cells both pathogens proliferate in vacuoles whose biogenesis displays some common features. To test the functional similarity of their respective intracellular niches, African green monkey kidney epithelial (Vero) cells, A/J mouse bone marrow-de…	2005	No									Sauer, JD, Shannon, JG, Howe, D, Hayes, SF, Swanson, MS, Heinzen, RA	INFECTION AND IMMUNITY	73	8	4494-4504		10.1128/IAI.73.8.4494-4504.2005	16040960	http://iai.asm.org/cgi/pmidlookup?view=long&pmid=16040960
A SUPER-SPREADING EWE INFECTS HUNDREDS WITH Q FEVER AT A FARMERS' MARKET IN GERMANY	Background: In May 2003 the Soest County Health Department was informed of an unusually large number of patients hospitalized with atypical pneumonia. Methods: In exploratory interviews patients mentioned having visited a farmers' market where a sheep had lambed. Serologic testing confirmed the diagnosis of Q fever. We asked local health departments in Germany to identiy notified Q fever patients…	2006	No									Porten, K, Rissland, J, Tigges, A, Broll, S, Hopp, W, Lunemann, M, van Treeck, U, Kimmig, P, Brockmann, SO, Wagner-Wiening, C, Hellenbrand, W, Buchholz, U	BMC INFECTIOUS DISEASES	6		-		10.1186/1471-2334-6-147	17026751	https://bmcinfectdis.biomedcentral.com/articles/10.1186/1471-2334-6-147
CLINICAL AND PATHOLOGIC CHANGES IN A GUINEA PIG AEROSOL CHALLENGE MODEL OF ACUTE Q FEVER	Acute Q fever is a zoonotic disease caused by the obligate intracellular bacterium Coxiella burnetii and can manifest as a flu-like illness, pneumonia, or hepatitis. A need exists in Q fever research for animal models mimicking both the typical route of infection (inhalation) and the clinical illness seen in human cases of Q fever. A guinea pig aerosol challenge model was developed using C. burne…	2006	No									Russell-Lodrigue, KE, Zhang, GQ, McMurray, DN, Samuel, JE	INFECTION AND IMMUNITY	74	11	6085-6091		10.1128/IAI.00763-06	17057087	http://iai.asm.org/cgi/pmidlookup?view=long&pmid=17057087
EPIDEMIOLOGICAL STUDY OF Q FEVER IN HUMANS, RUMINANT ANIMALS, AND TICKS IN CYPRUS USING A GEOGRAPHICAL INFORMATION SYSTEM	A cross-sectional study of Q fever was conducted in a representative sample of the human and animal population in Cyprus in order to assess the seroprevalence of Q fever and the prevalence of related risk factors. A total of 583 human and 974 ruminant animal serum samples were collected and tested for the detection of antibodies against Coxiella burnetii phase II antigen using an indirect immunof…	2006	No									Psaroulaki, A, Hadjichristodoulou, C, Loukaides, F, Soteriades, E, Konstantinidis, A, Papastergiou, P, Ioannidou, M C, Tselentis, Y	EUROPEAN JOURNAL OF CLINICAL MICROBIOLOGY & INFECTIOUS DISEASES : OFFICIAL PUBLICATION OF THE EUROPEAN SOCIETY OF CLINICAL MICROBIOLOGY	25	9	576-86	Adolescent, Adult, Animals, Animals, Domestic, Child, Coxiella burnetii, Cross-Sectional Studies, Cyprus, Female, Geographic Information Systems, Humans, Male, Mass Screening, Q Fever, Ruminants, Seroepidemiologic Studies, Ticks	10.1007/s10096-006-0170-7	16915398	https://dx.doi.org/10.1007/s10096-006-0170-7
HUMAN COXIELLA BURNETII INFECTIONS IN REGIONS OF BOSNIA AND HERZEGOVINA, 2002	Acute infections in humans and animals caused by Coxiella burnetii (C. burnetii) are becoming an important medical problem for Bosnia and Herzegovina (B&H). From a clinical and epidemiological aspect, Q fever represents a complex medical problem, considering that one of the highest incidence rates of Q fever in Europe has been recorded during the last few years in B&H. The first case of this dise…	2006	No									Sukrija, Z, Hamzic, S, Cengic, D, Beslagic, E, Fejzic, N, Cobanov, D, Maglajlic, J, Puvacic, S, Puvacic, Z	CENTURY OF RICKETTSIOLOGY: EMERGING, REEMERGING RICKETTSIOSES, MOLECULAR DIAGNOSTICS, AND EMERGING VETERINARY RICKETTSIOSES	1078		124-128	Coxiella burnetti, human and animal infections, Q fever, Bosnia and Herzegovina, 2002	10.1196/annals.1374.128	17114692	http://onlinelibrary.wiley.com/resolve/openurl?genre=article&sid=nlm:pubmed&issn=0077-8923&date=2006&volume=1078&spage=124
RICKETTSIOSES IN JAPAN AND THE FAR EAST	Three rickettsial diseases are known to exist in Japan currently: Japanese spotted fever (JSF), Tsutsugamushi disease (TD; scrub typhus), and Q fever. Since April 1999, the system for infection control and prevention in Japan has changed drastically. JSF, Q fever, and TD, as emerging infectious diseases, are designated as national notifiable diseases.The geographic distribution of JSF patients is…	2006	No									Mahara, Fumihiko	ANNALS OF THE NEW YORK ACADEMY OF SCIENCES	1078		60-73	Anti-Bacterial Agents, Drug Therapy, Combination, Far East, Humans, Incidence, Japan, Rickettsia Infections, Rickettsiaceae Infections, Scrub Typhus, Serologic Tests	10.1196/annals.1374.007	17114681	http://onlinelibrary.wiley.com/resolve/openurl?genre=article&sid=nlm:pubmed&issn=0077-8923&date=2006&volume=1078&spage=60
SEROTESTING OF HUMAN Q FEVER DISTRIBUTION IN BOSNIA AND HERZEGOVINA	Q fever is a zoonotic disease with worldwide distribution. It occurs in different geographic regions and climate zones. From 1990 till the end of 1997, only three infected individuals were registered in Bosnia and Herzegovina, during the year 1991, with the incidence of 0.05% 000. From 1996 onward, there was a sudden aggravation of epizoological and epidemiological situation in particular regions…	2006	No									Hamzic, S, Beslagic, E, Zvizdic, S	CENTURY OF RICKETTSIOLOGY: EMERGING, REEMERGING RICKETTSIOSES, MOLECULAR DIAGNOSTICS, AND EMERGING VETERINARY RICKETTSIOSES	1078		133-136	human Q fever, seroprevalence, distribution, Bosnia and Herzegovina	10.1196/annals.1374.022	17114694	http://onlinelibrary.wiley.com/resolve/openurl?genre=article&sid=nlm:pubmed&issn=0077-8923&date=2006&volume=1078&spage=133
WIND, RAIN AND BACTERIA: THE EFFECT OF WEATHER ON THE MICROBIAL COMPOSITION OF ROOF-HARVESTED RAINWATER	The microbiological and chemical quality of tank-stored rainwater is impacted directly by roof catchment and subsequent run-off contamination, via direct depositions by birds and small mammals, decay of accumulated organic debris, and atmospheric deposition of airborne micro-organisms and chemical pollutants. Previous literature reports on roof water quality have given little consideration to the…	2006	No									Evans, CA, Coombes, PJ, Dunstan, RH	WATER RESEARCH	40	1	37-44	rainwater tanks, roof run-off, water quality, bacterial composition, airborne micro-organisms, climatic variables	10.1016/j.watres.2005.10.034	16343588	https://linkinghub.elsevier.com/retrieve/pii/S0043-1354(05)00624-X
ZOONOTIC INFECTIONS AMONG VETERINARIANS IN TURKEY: CRIMEAN-CONGO HEMORRHAGIC FEVER AND BEYOND	Objectives: We aimed to determine the seroprevalence of Crimean-Congo hemorrhagic fever (CCHF) virus, Brucella spp, and Coxiella burnetii among veterinarians in a highly endemic and a non-endemic region for these infections in Turkey. Methods: The antibody levels against these three infections were surveyed. Eighty-three veterinarians were included from two distinct geographic regions. Results: C…	2006	No									Erognul, O, Zeller, H, Kilic, S, Kutlu, S, Kutlu, M, Cavusoglu, S, Esen, B, Dokuzoguz, B	INTERNATIONAL JOURNAL OF INFECTIOUS DISEASES	10	6	465-469	veterinarians, antibody, Crimean-Congo hemorrhagic fever virus, Brucella spp, Coxiella burnetii	10.1016/j.ijid.2006.06.005	NA	NA
AN OUTBREAK OF Q FEVER IN THE NETHERLANDS--POSSIBLE LINK TO GOATS	In 2007, 73 cases of Q fever were identified through reports and retrospective analyses; the affected region extended from Tilburg in the southwest to Arnhem in the northeast. The infections arose in late spring, particularly in May and June. Several spontaneous abortions due to Q fever occurred on 4 dairy goat farms in the same region. The national incidence of spontaneous abortion due to Q feve…	2007	No									Van Steenbergen, J E, Morroy, G, Groot, C A R, Ruikes, F G H, Marcelis, J H, Speelman, P	NEDERLANDS TIJDSCHRIFT VOOR GENEESKUNDE	151	36	1998-2003	Abortion, Veterinary, Animals, Anti-Bacterial Agents, Coxiella burnetii, Disease Outbreaks, Goat Diseases, Goats, Humans, Netherlands, Q Fever, Retrospective Studies, Zoonoses		17953175	NA
CLINICAL MANIFESTATIONS OF Q FEVER IN ADULTS AND CHILDREN	Q fever is a common zoonosis with almost a worldwide distribution caused by Coxiella burnetii. Farm animals and pets are the main reservoirs of infection and transmission to humans is usually via inhalation of contaminated aerosols, which may be carried by the wind far from the original source of infection. Occupational groups with close association with farm or wild animals are most at risk, how…	2007	No									Terheggen, Ulrich, Leggat, Peter A	TRAVEL MEDICINE AND INFECTIOUS DISEASE	5	3	159-64	Adult, Animals, Child, Coxiella burnetii, Disease Reservoirs, Humans, Q Fever, Severity of Illness Index, Travel, Zoonoses	10.1016/j.tmaid.2006.06.001	17448942	https://linkinghub.elsevier.com/retrieve/pii/S1477-8939(06)00073-1
COXIELLA BURNETII INHIBITS APOPTOSIS IN HUMAN THP-1 CELLS AND MONKEY PRIMARY ALVEOLAR MACROPHAGES	Coxiella burnetii, the cause of human Q fever, is an aerosol-borne, obligate intracellular bacterium that targets host alveolar mononuclear phagocytic cells during infection. In all cell types examined, C burnetii establishes a replicative niche in a lysosome-like parasitophorous vacuole where it carries out a lengthy infectious cycle with minimal cytopathic effects. The persistent and mild natur…	2007	No									Voth, DE, Howe, D, Heinzen, RA	INFECTION AND IMMUNITY	75	9	4263-4271		10.1128/IAI.00594-07	17606599	http://iai.asm.org/cgi/pmidlookup?view=long&pmid=17606599
CURRENT REVIEW OF Q FEVER DIAGNOSIS IN ANIMALS	Q fever is a zoonosis caused by the intracellular bacterium Coxiella burnetii, transmitted to man by the inhalation of contaminated dust or aerosols. Domestic ungulates (goats, sheep, cattle) constitute the main reservoir for C. burnetii, although other mammals such as dogs, cats and wild rabbits have been known to transmit the bacterium. In ruminants, abortion is the most important clinical mani…	2007	No									Nicollet, P, Valognes, A	BULLETIN DE L ACADEMIE VETERINAIRE DE FRANCE	160	4	289-295	Q fever, coxiella burnetii, ruminants, abortions, departmental laboratory, occupational disease		NA	NA
FEVER OF UNKNOWN ORIGIN DUE TO RICKETTSIOSES	Most common rickettsioses do not fill the criteria for fever of unknown origin, with fever often inferior to lasting less than 1 week. Q fever, scrub typhus, murine typhus, human monocytic ehrlichiosis, and Bartonellosis could fill these criteria, however, notably in uncommon presentations. Moreover, in patients returning from tropical areas or from geographic endemic areas for rickettsiosis, or …	2007	No									Botelho-Nevers, E, Raoult, D	INFECTIOUS DISEASE CLINICS OF NORTH AMERICA	21	4	997-+		10.1016/j.idc.2007.08.002	18061086	https://linkinghub.elsevier.com/retrieve/pii/S0891-5520(07)00070-0
HUMAN Q FEVER	Q fever is a ubiquitous zoonosis due to Coxiella burnetii, a strict intracellular bacterium. Transmission to man occurs mainly through the inhalation of infected aerosols, arising mostly from livestock deliveries. The main characteristic of Q fever is its clinical variability, acute forms being associated with primary infection (flu-like syndrome, pneumopathy, hepatitis). The clinical expression …	2007	No									Tissot-Dupont, H	BULLETIN DE L ACADEMIE VETERINAIRE DE FRANCE	160	4	297-302	Q fever, Coxiella burnetii, clinical expression, epidemiology, treatment, human		NA	NA
IDENTIFYING THE MAJOR INFLUENCES ON THE MICROBIAL COMPOSITION OF ROOF HARVESTED RAINWATER AND THE IMPLICATIONS FOR WATER QUALITY	Perceptions of the quality of roof harvested rainwater remain an impediment to widespread implementation of rainwater tanks on urban allotments. Previous literature reports on roof water quality have given little consideration to the relative significance of airborne environmental micro-organisms to roof catchment contamination and the issue of tank water quality. This paper outlines the findings…	2007	No									Evans, CA, Coombes, PJ, Dunstan, RH, Harrison, T	WATER SCIENCE AND TECHNOLOGY	55	4	245-253	airborne micro-organisms, bacterial composition, climatic variables, rainwater tanks, roof run-off, water quality	10.2166/wst.2007.115	17425092	NA
PATHOGENIC RICKETTSIAE AS BIOTERRORISM AGENTS	Because of their unique biological characteristics, such as environmental stability, small size, aerosol transmission, persistence in infected hosts, low infectious dose, and high associated morbidity and mortality, Rickettsia prowazekii and Coxiella burnetii have been weaponized. These biological attributes would make the pathogenic rickettsiae desirable bioterrorism agents. However, production …	2007	No									Azad, Abdu F	CLINICAL INFECTIOUS DISEASES : AN OFFICIAL PUBLICATION OF THE INFECTIOUS DISEASES SOCIETY OF AMERICA	45 Suppl 1		S52-5	Animals, Anti-Bacterial Agents, Bioterrorism, Coxiella burnetii, Disaster Planning, Doxycycline, Humans, Pediculus, Q Fever, Rickettsia prowazekii, Typhus, Epidemic Louse-Borne, Virulence	10.1086/518147	17582570	https://academic.oup.com/cid/article-lookup/doi/10.1086/518147
Q FEVER IN LOGRO��O: AN ATTACK SCENARIO	Bioterrorism has emerged as an important infectious disease and public health challenge in the 21st century, and issues of preparedness and response are now prominent. The development of attack scenarios for assessing this problem contributes to the organization of response systems and identifies aspects that may need to be improved. The authors present an attack scenario involving Q fever in a s…	2007	No									Pappas, Georgios, Blanco, Jos�� R, Oteo, Jos�� A	ENFERMEDADES INFECCIOSAS Y MICROBIOLOGIA CLINICA	25	3	199-203	Aerosols, Bioterrorism, Coxiella burnetii, Disaster Planning, Disease Outbreaks, Emergencies, Environmental Exposure, Humans, Models, Biological, Politics, Q Fever, Spain, Urban Population		17335700	https://linkinghub.elsevier.com/retrieve/pii/13099373
Q FEVER: AN OVERVIEW	Q fever a zoonosis caused by the gram-negative bacterium Coxiella bumetii, occurs worldwide and affects both humans and animals. Ruminants are considered to be the main source of infection of humans, with the main route of infection being through inhalation of the organism of fine-particle aerosols. Abortion is the main clinical sign in ruminants. During and after abortion, large quantities of th…	2007	No									Muskens, J, Mars, MH, Franken, P	TIJDSCHRIFT VOOR DIERGENEESKUNDE	132	23	912-917			18085174	NA
Q FEVER: PROBLEMS AND HEALTH RISKS	Q fever is a zoonosis caused by Coxiella burnetii. Domestic ruminants are the main reservoirs for human contamination, as infected female ruminants shed the bacteria in parturition products, milk and faeces. Several studies describe the natural evolution of bacterial shedding by domestic ruminants. AFSSA proposed recommandations on Q fever risks and on reasoned measures applicable to infected she…	2007	No									Rousset, E, Duquesne, V, Russo, P, Thiery, R	BULLETIN DE L ACADEMIE VETERINAIRE DE FRANCE	160	2	107-114	Q fever, Coxiella burnetii, ruminant, public health		NA	NA
SOIL AND HUMAN HEALTH: AN EPIDEMIOLOGICAL REVIEW	Two different approaches have been used to study relationships between soil and human health: aggregate- and individual-level. Aggregate-level is the primary approach used in the geosciences and broadly relates spatial soil characteristics to geographic incidence of disease. However, this may not be appropriate for a wide range of exposures and disease outcomes. For example, many diseases with lo…	2007	No									Hough, RL	EUROPEAN JOURNAL OF SOIL SCIENCE	58	5	1200-1212		10.1111/j.1365-2389.2007.00922.x	NA	NA
EPIDEMIOLOGICAL ASPECTS OF HUMAN Q FEVER IN INDRE-ET-LOIRE BETWEEN 2003 AND 2005 AND COMPARISON WITH CAPRINE Q FEVER	Objective. - Chronic infection is the majorrisk of Q fever. C. burnetii infections result from the inhalation of contaminated aerosols. Indre-et-Loire is a rural French area with numerous goat farms. We evaluated human Q fever epidemiology and compared it with Q fever in goats. Design. - This retrospective study was made between 2003 and 2005. The diagnosis of C. burnetii infection was based on s…	2008	No									Chaillon, A, Bind, JL, Delaval, J, Haguenoer, K, Besnier, JM, Choutet, P	MEDECINE ET MALADIES INFECTIEUSES	38	4	215-224	Coxiella burnetii, caprine Q fever, professional infection	10.1016/j.medmal.2008.01.010	18395376	https://linkinghub.elsevier.com/retrieve/pii/S0399-077X(08)00033-4
EPIDEMIOLOGICAL VARIATION OF Q-FEVER IN ZENICA DOBOJ CANTON DURING PERIOD 2000-2005	After the war in Bosnia and Herzegovina there is a sudden increase in number of infected with the Q-fever, which becomes huge public health and economic problem. Although this disease occurred in very different geographic areas of Bosnia and Herzegovina the Zenica-Doboj Canton was among the most affected. Infections of Q-fever at the Zenica-Doboj Canton represent very complex epidemiology problem…	2008	No									Alickovi��, Ibrahim, Tandir, Salih, Puvaci��, Zlatko, Zvizdi��, Sukrija, Hamzi��, Sadeta	MEDICINSKI ARHIV	62	2	96-9	Adolescent, Adult, Bosnia and Herzegovina, Child, Female, Humans, Incidence, Male, Middle Aged, Q Fever		18669229	NA
Q FEVER: EPIDEMIOLOGY, DIAGNOSIS, AND TREATMENT	Q fever, a zoonosis caused by Coxiella burnetii, is seen throughout the world. Recent reports suggest that its incidence in the United States is increasing, with more than 30 cases reported in the US military. The disease has many acute and chronic manifestations. Endocarditis is the most common form of chronic disease, and recent studies have led to substantial changes in the approach to its dia…	2008	No									Hartzell, Joshua D, Wood-Morris, Robert N, Martinez, Luis J, Trotta, Richard F	MAYO CLINIC PROCEEDINGS	83	5	574-9	Acute Disease, Anti-Bacterial Agents, Bacterial Vaccines, Chronic Disease, Doxycycline, Endocarditis, Bacterial, Female, Humans, Military Personnel, Pregnancy, Pregnancy Complications, Infectious, Q Fever, United States	10.4065/83.5.574	18452690	https://linkinghub.elsevier.com/retrieve/pii/S0025-6196(11)60733-7
SEROPREVALENCE OF ANTIBODIES TO COXIELLA BURNETII AMONG EMPLOYEES OF THE VETERINARY UNIVERSITY IN KOSICE, EASTERN SLOVAKIA	Coxiella burnetii is an obligate intracellular pathogen known to be the causative agent of Q fever, a zoonosis with worldwide occurrence. The organism has been found in many wild and domestic animals. Infected animals shed highly stable bacteria in urine, faeces, milk, and through placental and birth fluids. Humans acquire the infection mainly by inhaling infected aerosols, or by ingesting contam…	2008	No									Dorko, E, Kalinova, Z, Weissova, T, Pilipcinec, E	ANNALS OF AGRICULTURAL AND ENVIRONMENTAL MEDICINE	15	1	119-124	Q fever, Coxiella burnetii, antibodies, ELISA, veterinarians, animal nurses		18581989	http://www.aaem.pl/fulltext.php?ICID=15119
APPROACH FOR COXIELLA BURNETII SHEDDING RISK ASSESSMENT IN DAIRY GOAT HERDS IN SOUTH-EAST OF FRANCE	Q fever is a zoonosis due to Coxiella burnetii. Transmission of this bacterium takes place mostly by air or by close contact with infected ruminants. An investigation in dairy goat herds in the South East of France showed a high frequency of Q fever asymptomatic carriage. Seropositivity was found in 13/14 and 24/28 herds in 2006 and 2008, respectively. Moreover, bacterial shedding by the vaginal …	2009	No									Dubuc-Forfait, C, Rousset, E, Champion, JL, Marois, M, Dufour, P, Zerhaoui, E, Thiery, R, Sabatier, P	EPIDEMIOLOGIE ET SANTE ANIMALE, NO 55	NA	55	117-136	Coxiella burnetii, Goats, Human, Hazard, Principal Component Analysis (PCA), Typology		NA	NA
CLIMATE, ENVIRONMENT, AND RESPIRATORY TRACT INFECTIONS	Climatic factors (temperature, wind, humidity) and their changes play a major role in the epidemiology of infectious diseases, mainly those vector borne or water-borne. In terms of respiratory tract infections, the role of cold remains controversial, although evident in popular belief: the winter peak is multifactorial, but exposure to cold causes a vasoconstriction of the nasal and upper respira…	2009	No									Tissot-Dupont, H	MEDECINE ET MALADIES INFECTIEUSES	39	3	200-2	Climate, Coxiella burnetii, Environment, Hand, Humans, Q Fever, Respiratory Tract Infections, Virus Diseases, Wind	10.1016/j.medmal.2008.12.002	19211210	https://linkinghub.elsevier.com/retrieve/pii/S0399-077X(08)00468-X
COXIELLA BURNETII GLYCOMICS AND PROTEOMICS-TOOLS FOR LINKING STRUCTURE TO FUNCTION	Coxiella burnetii, the causative agent of Q fever, is an obligate intracellular bacterium and a highly infectious pathogen. The disease is a widespread zoonosis and is endemic throughout the world. An easy aerosol dissemination, environmental persistence, and high infectivity make the bacterium a serious threat for humans and animals. Lipopolysaccharide is considered one of the major factors of v…	2009	No									Toman, R, Skultety, L, Ihnatko, R	RICKETTSIOLOGY AND RICKETTSIAL DISEASES	1166		67-78	Coxiella burnetii, glycomics, proteomics, Q fever	10.1111/j.1749-6632.2009.04512.x	19538265	http://dx.doi.org/10.1111/j.1749-6632.2009.04512.x
COXIELLA BURNETII ISOLATES CAUSE GENOGROUP-SPECIFIC VIRULENCE IN MOUSE AND GUINEA PIG MODELS OF ACUTE Q FEVER	Q fever is a zoonotic disease of worldwide significance caused by the obligate intracellular bacterium Coxiella burnetii. Humans with Q fever may experience an acute flu-like illness and pneumonia and/or chronic hepatitis or endocarditis. Various markers demonstrate significant phylogenetic separation between and clustering among isolates from acute and chronic human disease. The clinical and pat…	2009	No									Russell-Lodrigue, KE, Andoh, M, Poels, MWJ, Shive, HR, Weeks, BR, Zhang, GQ, Tersteeg, C, Masegi, T, Hotta, A, Yamaguchi, T, Fukushi, H, Hirai, K, McMurray, DN, Samuel, JE	INFECTION AND IMMUNITY	77	12	5640-5650		10.1128/IAI.00851-09	19786560	http://iai.asm.org/cgi/pmidlookup?view=long&pmid=19786560
INVESTIGATION OF A Q FEVER OUTBREAK IN A RURAL AREA OF THE NETHERLANDS	A Q fever outbreak occurred in the Southeast of The Netherlands in spring and summer 2007. Risk factors for the acquisition of a recent Coxiella burnetii infection were Studied. In total, 696 inhabitants in the cluster area were invited to complete a questionnaire and provide a blood sample for serological testing of IgG and IgM phases I and 11 antibodies against C. burnetii, in order to recruit …	2009	No									Karagiannis, I, Schimmer, B, van Lier, A, Timen, A, Schneeberger, P, van Rotterdam, B, de Bruin, A, Wijkmans, C, Rietveld, A, van Duynhoven, Y	EPIDEMIOLOGY AND INFECTION	137	9	1283-1294	Aerosols, disease outbreaks, Q fever, weather	10.1017/S0950268808001908	19161644	https://www.cambridge.org/core/product/identifier/S0950268808001908/type/journal_article
LABORATORY MAINTENANCE OF COXIELLA BURNETII	Coxiella burnetii, an obligate intracellular Gram-negative bacterium, is the agent of Q fever, a self-limited flu-like illness that may also present as chronic endocarditis. The ability to persist in the environment at a low infectious dose in aerosols resulted in the classification of C. burnetii as a BSL-3 select agent. Routine propagation of this agent is in embryonated eggs or tissue culture.…	2009	No									Samuel, James E, Hendrix, Laura R	CURRENT PROTOCOLS IN MICROBIOLOGY	Chapter 6		Unit 6C.1	Animals, Bacteriological Techniques, Containment of Biohazards, Coxiella burnetii, Humans, Polymerase Chain Reaction, Q Fever, Staining and Labeling	10.1002/9780471729259.mc06c01s15	19885942	https://dx.doi.org/10.1002/9780471729259.mc06c01s15
Q FEVER IN TUNISIA	Q fever is a common zoonosis with almost a worldwide distribution caused by Coxiella burnetii. Farm animals and pets are the main reservoirs of infection and transmission to humans is usually via inhalation of contaminated aerosols. Infection in humans is often asymptomatic, but it can manifest as an acute disease (usually a self-limited flu-like illness, pneumonia or hepatitis) or as a chronic f…	2009	No									Kaabia, N, Letaief, A	PATHOLOGIE BIOLOGIE	57	5	439-443	Q fever, Coxiella burnetii, Epidemiology, Tunisia	10.1016/j.patbio.2008.04.009	18554822	https://linkinghub.elsevier.com/retrieve/pii/S0369-8114(08)00120-X
Q FEVER OUTBREAKS IN SMALL RUMINANTS AND PEOPLE IN THE NETHERLANDS	Q fever is an almost ubiquitous zoonosis caused by the highly resistant aerobic Gram-negative bacterium Coxiella burnetii. Cattle, sheep and goats are the primary animal reservoirs, but infection with this organism may occur in several animal species. Infected sheep and goats may abort, mainly in late pregnancy. The causative agent is shed in urine, vaginal fluids, faeces, milk and, in high conce…	2009	No									Van den Brom, R, Vellema, P	SMALL RUMINANT RESEARCH	86	1-3	74-79	Sheep, Goat, Abortion, Coxiella burnetii, Zoonosis	10.1016/j.smallrumres.2009.09.022	NA	NA
REAL-TIME PCR FOR THE EARLY DETECTION AND QUANTIFICATION OF COXIELLA BURNETII AS AN ALTERNATIVE TO THE MURINE BIOASSAY	Real-time PCR was used to analyze archived blood from non-human primates (NHP) and fluid samples originating from a well-controlled Q fever vaccine efficacy trial. The PCR targets were the IS1111 element and the com1 gene of Coxiella burnetii. Data from that previous study were used to evaluate real-time PCR as an alternative to the use of sero-conversion by mouse bioassay for both quantification…	2009	NO									Howe, GB, Loveless, BM, Norwood, D, Craw, P, Waag, D, England, M, Lowe, JR, Courtney, BC, Pitt, ML, Kulesh, DA	MOLECULAR AND CELLULAR PROBES	23	3-4	127-131	Coxiella burnetii, Q fever, Real-time PCR, Non-human primates, Aerosol challenge, Mouse bioassay	10.1016/j.mcp.2009.01.004	19284978	https://linkinghub.elsevier.com/retrieve/pii/S0890-8508(09)00005-X
RODENT CONTROL AT DIFFERENT SPATIAL SCALES ON POULTRY FARMS IN THE PROVINCE OF BUENOS AIRES, ARGENTINA	In poultry farms of central Argentina rodents cause economic losses by the consumption and contamination of chicken food, and also pose a serious sanitary risk as transmitters of several diseases to human and domestic animals, such as leptospirosis, salmonellosis, trichinosis, hantavirus pulmonary syndrome, hantavirus renal syndrome, and Argentine hemorrhagic fever. Because one of the problems in…	2009	No									Leon, V, Fraschina, J, Busch, M	INTERNATIONAL BIODETERIORATION & BIODEGRADATION	63	8	1113-1118	Rodents, Pest control, Diseases, Poultry farms, Population recovery	10.1016/j.ibiod.2009.08.004	NA	NA
A CASE OF PERSON-TO-PERSON TRANSMISSION OF Q FEVER FROM AN ACTIVE DUTY SERVICEMAN TO HIS SPOUSE	Coxiella burnetii has recently gained military relevance given its potential as a bioterrorism agent, and the multiple cases reported among U. S. military personnel deployed to the Middle East. Sexual transmission of Q fever is rare but has been reported in the literature. We describe the possible sexual transmission of Q fever from a returning serviceman from Iraq to his wife. In a recent editor…	2010	No									Miceli, MH, Veryser, AK, Anderson, AD, Hofinger, D, Lee, SA, Tancik, C	VECTOR-BORNE AND ZOONOTIC DISEASES	10	5	539-541	Middle East deployment, Q fever, Sexual transmission, US military	10.1089/vbz.2009.0101	20020811	http://dx.doi.org/10.1089/vbz.2009.0101
A LARGE Q FEVER OUTBREAK IN AN URBAN SCHOOL IN CENTRAL ISRAEL	Background. On 28 June 2005, numerous cases of febrile illness were reported among 322 students and employees of a boarding high school located in an urban area in central Israel. Subsequent investigation identified a large outbreak of Q fever which started 2 weeks earlier. We describe the investigation of this outbreak and its possible implications. Methods. We conducted a case-control study to …	2010	No									Amitai, Z, Bromberg, M, Bernstein, M, Raveh, D, Keysary, A, David, D, Pitlik, S, Swerdlow, D, Massung, R, Rzotkiewicz, S, Halutz, O, Shohat, T	CLINICAL INFECTIOUS DISEASES	50	11	1433-1438		10.1086/652442	20415568	https://academic.oup.com/cid/article-lookup/doi/10.1086/652442
ANALYSIS OF DUST SAMPLES FROM THE MIDDLE EAST USING HIGH DENSITY RESEQUENCING MICROARRAY "RPM-TEI"	A previously developed resequencing microarray, "Tropical and Emerging Infections (RPM-TEI v. 1.0 chip)", designed to identify and discriminate between tropical diseases and other potential biothreat agents, their near-neighbor species, and/or potential confounders, was used to characterize the microbes present in the silt/clay fraction of surface soils and airborne dust collected from the Middle…	2010	No									Leski, TA, Gregory, MJ, Malanoski, AP, Smith, JP, Glaven, RH, Wang, Z, Stenger, DA, Lin, B	SENSORS, AND COMMAND, CONTROL, COMMUNICATIONS, AND INTELLIGENCE (C3I) TECHNOLOGIES FOR HOMELAND SECURITY AND HOMELAND DEFENSE IX	7666		-	resequencing microarray, Tropical and Emerging infections, biothreat agents, airborne dust, length heterogeneity PCR (LH-PCR)	10.1117/12.853119	NA	NA
COXIELLA BURNETII TRANSCRIPTIONAL ANALYSIS REVEALS SERENDIPITY CLUSTERS OF REGULATION IN INTRACELLULAR BACTERIA	Coxiella burnetii, the causative agent of the zoonotic disease Q fever, is mainly transmitted to humans through an aerosol route. A spore-like form allows C. burnetii to resist different environmental conditions. Because of this, analysis of the survival strategies used by this bacterium to adapt to new environmental conditions is critical for our understanding of C. burnetii pathogenicity. Here,…	2010	No									Leroy, Q, Lebrigand, K, Armougom, F, Barbry, P, Thiery, R, Raoult, D	PLOS ONE	5	12	-		10.1371/journal.pone.0015321	21203564	http://dx.plos.org/10.1371/journal.pone.0015321
EVALUATION OF THE RISK OF NEIGHBOURHOOD INFECTION OF H7N1 HIGHLY PATHOGENIC AVIAN INFLUENZA IN ITALY USING Q STATISTIC	Exposure to the risk of neighbourhood infection was estimated for the H7N1 Highly Pathogenic Avian Influenza (HPAI) epidemic that affected Northern Italy between 1999 and 2000. The two most affected regions (Lombardy and Veneto) were analyzed and the epidemic was divided into three phases. Q statistics were used to evaluate exposure to the risk of neighbourhood infection using two measures. First…	2010	No									Mulatti, P, Kitron, U, Jacquez, GM, Mannelli, A, Marangon, S	PREVENTIVE VETERINARY MEDICINE	95	3-4	267-274	Spatial analysis, Exposure, Temporal Risk Window, Avian Influenza	10.1016/j.prevetmed.2010.04.005	20451272	https://linkinghub.elsevier.com/retrieve/pii/S0167-5877(10)00106-6
INFECTION BY COXIELLA BURNETII (Q FEVER)	In spite of being described over 60 years, Q fever is still a little known disease. The exact prevalence is also unknown, but probably the number of cases of Q fever is underestimated. There is much variation in the clinical presentation, including severe forms with a poor prognosis. Acute cases often present as an asymptomatic infection, flu-like syndrome, pneumonia or hepatitis. Presumably, hos…	2010	No									Fari��as, Mar��a Teresa Fraile, Collado, Carlos Mu��oz	ENFERMEDADES INFECCIOSAS Y MICROBIOLOGIA CLINICA	28 Suppl 1		29-32	Animals, Animals, Domestic, Antibodies, Bacterial, Ciprofloxacin, Coxiella burnetii, DNA, Bacterial, Doxycycline, Endocarditis, Bacterial, Fever of Unknown Origin, Heart Valve Prosthesis Implantation, Humans, Immunoglobulin G, Immunoglobulin M, Polymerase Chain Reaction, Q Fever, Zoonoses	10.1016/S0213-005X(10)70005-7	20172420	https://linkinghub.elsevier.com/retrieve/pii/S0213-005X(10)70005-7
KINETICS OF COXIELLA BURNETII EXCRETION IN A COMMERCIAL DAIRY SHEEP FLOCK AFTER TREATMENT WITH OXYTETRACYCLINE	The kinetics of Coxiella burnetii excretion were studied in dairy sheep using a flock that had a previous history of abortion and a positive polymerase chain reaction (PCR) test for C. burnetii in milk from the bulk-tank. An ELISA used to test sera antibodies revealed a high within-flock seroprevalence (54%). Fifty individual milk samples analysed by PCR showed a high number of milk shedders in t…	2010	No									Astobiza, I, Barandika, JF, Hurtado, A, Juste, RA, Garcia-Perez, AL	VETERINARY JOURNAL	184	2	172-175	Coxiella burnetii, Dairy sheep, Oxytetracycline, Shedding route, PCR	10.1016/j.tvjl.2009.01.017	19269867	https://linkinghub.elsevier.com/retrieve/pii/S1090-0233(09)00032-X
Q FEVER IN CROATIA: WAR-INDUCED CHANGES IN EPIDEMIOLOGICAL CHARACTERISTICS	The article describes the epidemiological characteristics of Q fever in Croatia, during the period before and after the Homeland War. In the ten years prior to the Homeland War (1983-1992) 1053 cases of Q fever were recorded, 16.2% (171) of which on islands and in coastal areas. In the period after the Homeland War (1995-2008), a total of 654 cases was recorded, 59.9% (392) of which on islands an…	2010	No									Muli��, Rosanda, Petricevi��, Josko, Kljaji��, Zlatko, Poljak, Nikola Kolja, Ropac, Darko	COLLEGIUM ANTROPOLOGICUM	34	3	859-64	Adolescent, Adult, Aged, Child, Child, Preschool, Croatia, Female, Humans, Infant, Infant, Newborn, Male, Middle Aged, Morbidity, Q Fever, Seasons, Time Factors, Warfare		20977073	NA
Q FEVER IN DOMESTIC RUMINANTS	Q fever is a worldwide zoonosis caused by C. burnetii. This obligate intracellular Gram-negative pathogen can infect a wide range of animal species, with domestic ruminants as the main reservoirs of infection and source of contamination for humans. The primary route of transmission consists of inhalation of contaminated aerosols. The acute syndrome in man is associated with a wide clinical spectr…	2010	No									Borriello, G, Iovane, G, Galiero, G	LARGE ANIMAL REVIEW	16	6	273-+	Coxiella burnetii, Q fever, diagnosis, epidemiology		NA	NA
Q FEVER OUTBREAK IN CHELTENHAM, UNITED KINGDOM, IN 2007 AND THE USE OF DISPERSION MODELLING TO INVESTIGATE THE POSSIBILITY OF AIRBORNE SPREAD	We describe the investigation of an outbreak of Q fever in the town of Cheltenham, England. The outbreak was detected in June 2007, and prospective and retrospective case finding identified 30 confirmed or probable human cases. The investigation identified windborne spread of Coxiella burnetii from nearby sheep farms as the most likely source of infection. A telephone survey was conducted to iden…	2010	No									Wallensten, A, Moore, P, Webster, H, Johnson, C, van der Burgt, G, Pritchard, G, Ellis-Iversen, J, Oliver, I	EUROSURVEILLANCE	15	12	16-22			NA	NA
RATS AS INDICATORS OF THE PRESENCE AND DISPERSAL OF SIX ZOONOTIC MICROBIAL AGENTS IN CYPRUS, AN ISLAND ECOSYSTEM: A SEROEPIDEMIOLOGICAL STUDY	A total of 622 rats (402 Rattus norvegicus and 220 R. rattus frugivorus) were collected in 51 different areas in Cyprus during 2000-2003 and used as indicators of the presence and dispersal of six zoonotic microbial agents. IgG antibodies against Rickettsia typhi (241/496, 48.6%), R. conorii (209/500, 41.8%), Toxoplasma sp. (138/494, 27.9%), Coxiella burnetti (63/494, 12.8%), Bartonella henselae …	2010	No									Psaroulaki, A, Antoniou, M, Toumazos, P, Mazeris, A, Ioannou, I, Chochlakis, D, Christophi, N, Loukaides, P, Patsias, A, Moschandrea, I, Tselentis, Y	TRANSACTIONS OF THE ROYAL SOCIETY OF TROPICAL MEDICINE AND HYGIENE	104	11	733-739	Rickettsia, Leishmania, Toxoplasma, Bartonella, Coxiella, Rats	10.1016/j.trstmh.2010.08.005	20870259	https://academic.oup.com/trstmh/article-lookup/doi/10.1016/j.trstmh.2010.08.005
SERO-EPIDEMIOLOGIC INVESTIGATION ON TICK-BORNE DISEASES OF HUMANS AND DOMESTIC ANIMALS IN ZHEJIANG PROVINCE	To investigate the seroprevalence of tick-borne diseases in humans and domestic animals from rural areas of Zhejiang province., Anji county, Jindong district and Tiantai county were selected for samples collection according to their geographic locations and historical prevalence of tick-borne diseases. Blood samples of humans and domestic animals were collected in the three sites. An indirect imm…	2010	No									Chai, Cheng-liang, Lu, Qun-ying, Sun, Ji-min, Jiang, Li-ping, Ling, Feng, Zhang, Li-juan, Zheng, Shou-gui, Zhang, Hong, Ge, Jun-hua	ZHONGHUA LIU XING BING XUE ZA ZHI = ZHONGHUA LIUXINGBINGXUE ZAZHI	31	10	1144-7	Adolescent, Adult, Aged, Aged, 80 and over, Animals, Antibodies, Bacterial, Bartonella, Cattle, Child, Child, Preschool, China, Female, Humans, Infant, Infant, Newborn, Male, Middle Aged, Rickettsia, Seroepidemiologic Studies, Sheep, Tick-Borne Diseases, Ticks, Young Adult		21162818	http://journal.yiigle.com/LinkIn.do?linkin_type=pubmed&issn=0254-6450&year=2010&vol=31&issue=10&fpage=1144
SEROLOGICAL STUDY OF Q FEVER IN SHEEP IN THE TERRITORY OF EASTERN SLOVAKIA	Q fever is a zoonosis caused by infection with Caxiella hornetii. Althought the reservoir of C. burnetii consists of various species, the most common sources of human infection are farm animals, such as cattle, goats, and sheep. The agent is typically transmitted by the aerosol route, and in more than half of the cases primary infection is symptomless. Clinical outcomes of C. burnetii infection i…	2010	No									Dorko, E, Pilipcinec, E, Rimarova, K, Kostovcikova, J	ANNALS OF AGRICULTURAL AND ENVIRONMENTAL MEDICINE	17	2	323-325	Q fever, Coxiella burnetii, ELISA, antibody, sheep		21186777	http://www.aaem.pl/fulltext.php?ICID=17323
AN INTEGRATED DATABASE ON TICKS AND TICK-BORNE ZOONOSES IN THE TROPICS AND SUBTROPICS WITH SPECIAL REFERENCE TO DEVELOPING AND EMERGING COUNTRIES	Tick-borne zoonoses (TBZ) are emerging diseases worldwide. A large amount of information (e.g. case reports, results of epidemiological surveillance, etc.) is dispersed through various reference sources (ISI and non-ISI journals, conference proceedings, technical reports, etc.). An integrated database-derived from the ICTTD-3 project (http://www.icttd.nl)-was developed in order to gather TBZ reco…	2011	No									Vesco, U, Knap, N, Labruna, MB, Avsic-Zupanc, T, Estrada-Pena, A, Guglielmone, AA, Bechara, GH, Gueye, A, Lakos, A, Grindatto, A, Conte, V, De Meneghi, D	EXPERIMENTAL AND APPLIED ACAROLOGY	54	1	65-83	Database, Ticks, Animals, Humans, Diseases, Geographical distribution	10.1007/s10493-010-9414-4	21153757	https://dx.doi.org/10.1007/s10493-010-9414-4
APPLICATION OF A BROAD-RANGE RESEQUENCING ARRAY FOR DETECTION OF PATHOGENS IN DESERT DUST SAMPLES FROM KUWAIT AND IRAQ	A significant percentage of the human population is exposed to high levels of naturally occurring airborne dusts. Although the link between airborne particulate inhalation and a variety of respiratory diseases has long been established, little is known about the pathogenic role of the microbial component of the dust. In this study, we applied highly multiplexed PCR and a high-density resequencing…	2011	No									Leski, TA, Malanoski, AP, Gregory, MJ, Lin, BC, Stenger, DA	APPLIED AND ENVIRONMENTAL MICROBIOLOGY	77	13	4285-4292		10.1128/AEM.00021-11	21571877	http://aem.asm.org/cgi/pmidlookup?view=long&pmid=21571877
BIOLOGICAL AGENTS AS OCCUPATIONAL HAZARDS - SELECTED ISSUES	There are two main groups of biological agents regarded as occupational hazards: allergenic and/or toxic agents forming bioaerosols, and agents causing zoonoses and other infectious diseases. Bioaerosols occurring in the agricultural work environments comprise: bacteria, fungi, high molecular polymers produced by bacteria (endotoxin) or by fungi (beta-glucans), low molecular secondary metabolites…	2011	No									Dutkiewicz, J, Cisak, E, Sroka, J, Wojcik-Fatla, A, Zajac, V	ANNALS OF AGRICULTURAL AND ENVIRONMENTAL MEDICINE	18	2	286-293	biological agents, occupational hazards, bioaerosols, allergy, toxins, viruses, bacteria, fungi, infectious diseases, zoonoses, tick-borne diseases		22216801	http://www.aaem.pl/fulltext.php?ICID=972492
COXIELLA BURNETII SHEDDING AND ENVIRONMENTAL CONTAMINATION AT LAMBING IN TWO HIGHLY NATURALLY-INFECTED DAIRY SHEEP FLOCKS AFTER VACCINATION	Abortion due to Coxiella burnetii was confirmed in the 2007/08 season in two naturally-infected dairy sheep flocks. Proportion of C. burnetii shedders and bacterial loads in vaginal mucus were high among aborted or lambed ewes, as was within-flock seroprevalence. Before the next reproductive season (2008/09) 75% of ewes and 50% of replacement lambs were vaccinated (Coxevac, CEVA Sante Animale) ke…	2011	No									Astobiza, I, Barandika, JF, Ruiz-Fons, F, Hurtado, A, Povedano, I, Juste, RA, Garcia-Perez, AL	RESEARCH IN VETERINARY SCIENCE	91	3	E58-E63	Coxiella burnetii, Q fever, Ovine, Aerosols, Vaccination	10.1016/j.rvsc.2010.11.014	21168178	https://linkinghub.elsevier.com/retrieve/pii/S0034-5288(10)00394-2
EMERGENCE OF Q FEVER	Q fever is a worldwide zoonosis with many acute and chronic manifestations caused by the pathogen Coxiella burnetii. Farm animals and pets are the main reservoirs of infection, and transmission to human beings is mainly accomplished through inhalation of contaminated aerosols. Persons at greatest risk are those in contact with farm animals and include farmers, abattoir workers, and veterinarians.…	2011	No									Angelakis, E, Raoult, D	IRANIAN JOURNAL OF PUBLIC HEALTH	40	3	1-18	Coxiella burnetii, Q fever, Epidemiology		23113081	NA
GENOMOTYPING OF COXIELLA BURNETII USING MICROARRAYS REVEALS A CONSERVED GENOMOTYPE FOR HARD TICK ISOLATES	C. burnetii is a Gram-negative intracellular Y-proteobacteria that causes the zoonotic disease Q fever. Q fever can manifest as an acute or chronic illness. Different typing methods have been previously developed to classify C. burnetii isolates to explore its pathogenicity. Here, we report a comprehensive genomotyping method based on the presence or absence of genes using microarrays. The genomo…	2011	No									Leroy, Q, Armougom, F, Barbry, P, Raoult, D	PLOS ONE	6	10	-		10.1371/journal.pone.0025781	22046248	http://dx.plos.org/10.1371/journal.pone.0025781
OCCURRENCE OF COXIELLA BURNETII DNA IN BULK TANK MILK SAMPLES IN SWITZERLAND	From May to November 2007, 872 bulk tank milk samples representing farms from almost the entire territory of Switzerland were collected and analysed by quantitative PCR for the presence of Coxiella burnetii DNA. Quantification of C. burnetii DNA revealed values that ranged from <10 to <10(5) counts per ml of bulk milk (Highest count: 24 256 cells per ml). The samples originated from three compani…	2011	No									Baumgartner, A, Niederhauser, I, Schaeren, W	ARCHIV FUR LEBENSMITTELHYGIENE	62	6	200-204	Real time PCR, risk, epidemiology	10.2376/0003-925X-62-200	NA	NA
PROTEOMIC COMPARISON OF VIRULENT PHASE I AND AVIRULENT PHASE II OF COXIELLA BURNETII, THE CAUSATIVE AGENT OF Q FEVER	Coxiella burnetii, a category B biological warfare agent, causes multiple outbreaks of the zoonotic disease Q fever world-wide, each year. The virulent phase I and avirulent phase II variants of the Nine Mile RSA 493 and 439 strains of C. burnetii were propagated in embryonated hen eggs and then purified by centrifugation through Renografin gradients. Total protein fractions were isolated from ea…	2011	No									Skultety, L, Hajduch, M, Flores-Ramirez, G, Miernyk, JA, Ciampor, F, Toman, R, Sekeyova, Z	JOURNAL OF PROTEOMICS	74	10	1974-1984	Coxiella burnetii, LC-MS/MS, Phase variants, Proteomics, Virulence-associated proteins	10.1016/j.jprot.2011.05.017	21616182	https://linkinghub.elsevier.com/retrieve/pii/S1874-3919(11)00208-9
Q FEVER	The importance of Q fever from the veterinary and medical point of view was characterized, and the fact that the World Organisation for Animal Health (OIE) had classified it as a listed disease was mentioned. The reason for this classification was the zoonotic potential of Coxiella (C.) burnetii and its ubiquitous, global occurrence. The main properties of this microorganism were described. The e…	2011	No									Truszczynski, M	MEDYCYNA WETERYNARYJNA	67	1	15-19	Coxiella burnetii, Q fever, zoonosis		NA	NA
Q FEVER IN THE NETHERLANDS: THE ROLE OF LOCAL ENVIRONMENTAL CONDITIONS	The Netherlands is facing a Q fever epidemic in which dairy goats are implicated. People living close to an affected farm have an increased risk. However, no human cases were reported around a number of farms with serious Q fever problems. To assess the role of local environmental conditions which may add to the transmission or risk of Q fever, we gathered datasets on vegetation, land use, soil c…	2011	No									van der Hoek, W, Hunink, J, Vellema, P, Droogers, P	INTERNATIONAL JOURNAL OF ENVIRONMENTAL HEALTH RESEARCH	21	6	441-451	Q fever, Coxiella burnetii, environment, goats, The Netherlands	10.1080/09603123.2011.574270	21563011	NA
Q FEVER: STILL MORE QUERIES THAN ANSWERS	Q fever is a worldwide zoonosis, caused by C. burnetii. Infection usually occurs through inhalation of infected aerosols. The reservoir mainly consists of dairy cattle. Clinical symptoms of acute Q fever are non-specific and resemble a mild flu-like illness. Children often present with gastrointestinal symptoms and rash. Rarely, chronic infection develops. This is usually manifested as endo-cardi…	2011	No									Delsing, Corine E, Warris, Adilia, Bleeker-Rovers, Chantal P	ADVANCES IN EXPERIMENTAL MEDICINE AND BIOLOGY	719		133-43	Animals, Cattle, Coxiella burnetii, Female, Humans, Pregnancy, Q Fever	10.1007/978-1-4614-0204-6_12	22125041	https://dx.doi.org/10.1007/978-1-4614-0204-6_12
SEROPREVALENCE AND RISK FACTORS OF Q FEVER IN GOATS ON COMMERCIAL DAIRY GOAT FARMS IN THE NETHERLANDS, 2009-2010	Background: The aim of this study was to estimate the seroprevalence of Coxiella burnetii in dairy goat farms in the Netherlands and to identify risk factors for farm and goat seropositivity before mandatory vaccination started. We approached 334 eligible farms with more than 100 goats for serum sampling and a farm questionnaire. Per farm, median 21 goats were sampled. A farm was considered posit…	2011	No									Schimmer, B, Luttikholt, S, Hautvast, JLA, Graat, EAM, Vellema, P, van Duynhoven, YTHP	BMC VETERINARY RESEARCH	7		-	Coxiella burnetii, small ruminants, seroprevalence, risk factors, zoonosis, goat	10.1186/1746-6148-7-81	22208798	https://bmcvetres.biomedcentral.com/articles/10.1186/1746-6148-7-81
SEROPREVALENCE OF COXIELLA BURNETII IN CATTLE AND FARM-RAISED DEER IN KOREA	Q fever, caused by Coxiella burnetii, is a worldwide zoonosis that affects not wild animals but domestic animals throughout the world, except in New Zealand. Domestic ruminants are considered to be a major infection source of Q fever in humans. However, few studies on the prevalence of Q fever in humans or animals in Korea have been conducted. Thus, the aim of this study was to investigate the se…	2011	No									Jang, Y, Kim, H, Heo, I, Park, Y, Kim, S, Lee, M, Choe, N	AFRICAN JOURNAL OF MICROBIOLOGY RESEARCH	5	24	4234-4236	Q fever, Coxiella burnetii, cattle, deer		NA	NA
THE ROLE OF WILD RODENTS IN SPREAD AND TRANSMISSION OF COXIELLA BURNETII NEEDS FURTHER ELUCIDATION	Rodents are known to cause massive food losses, but are also implicated as reservoirs for a wide variety of zoonotic pathogens. This review discusses the contribution of rodents in the spread and transmission of Coxiella burnetii, the causative agent of Q-fever. We found that rodents have been implicated as reservoirs for Q-fever, but their role in pathogen maintenance, geographic spread and tran…	2011	No									Meerburg, BG, Reusken, CBEM	WILDLIFE RESEARCH	38	7	617-625		10.1071/WR10129	NA	NA
TRAVEL-ASSOCIATED ZOONOTIC BACTERIAL DISEASES	Bacterial zoonoses are increasingly described in association with travel. Some bacterial zoonoses constitute important causes of post-travel illness. We focus on leptospirosis and rickettsiosis - the most common travel-associated bacterial zoonoses., Leptospirosis is regarded to be the most common zoonotic disease worldwide. In industrialized countries recreational exposures, both domestic and ov…	2011	No									Leshem, Eyal, Meltzer, Eyal, Schwartz, Eli	CURRENT OPINION IN INFECTIOUS DISEASES	24	5	457-63	Animals, Disease Outbreaks, Humans, Leptospirosis, Rickettsia Infections, Travel, Zoonoses	10.1097/QCO.0b013e32834a1bd2	21788890	http://Insights.ovid.com/pubmed?pmid=21788890
A GEOGRAPHIC INFORMATION SYSTEM FOR THE STUDY OF PAST EPIDEMICS: THE 1705 EPIDEMIC IN MARTIGUES (BOUCHES-DU-RHONE, FRANCE)	At the beginning of the 18th century, the Provence region was hit by several severe epidemics whose causes are still not clearly understood. To draw up epidemic profiles and to identify the pathogenic agents concerned, we constituted a large onomastic database and built a geographic information system for Martigues, a medium-sized community in the south of France. The cross-linking of epidemiolog…	2012	No									Seguy, I, Bernigaud, N, Bringe, A, Signoli, M, Tzortzis, S	CANADIAN STUDIES IN POPULATION	39	3-4	107-121	GIS, reconstruction of the urban network, epidemics, dysentery, Q fever, measles, smallpox, whooping cough		NA	NA
ANTIGENIC ANALYSIS FOR VACCINES AND DIAGNOSTICS	Coxiella burnetii infection is frequently unrecognized or misdiagnosed, as symptoms generally mimic an in fluenza-like illness. However, the disease (Q fever) may result in chronic infection, usually manifesting as potentially fatal endocarditis. The development of a chronic fatigue-like sequela may also occur. Infected ruminants are the major reservoir for infection in humans, primarily through …	2012	No									Hendrix, LR, Chen, C	COXIELLA BURNETII: RECENT ADVANCES AND NEW PERSPECTIVES IN RESEARCH OF THE Q FEVER BACTERIUM	984		299-328	Coxiella burnetii, Antigens, Diagnostics, Immunogenic proteins, Vaccines	10.1007/978-94-007-4315-1_16	22711639	https://dx.doi.org/10.1007/978-94-007-4315-1_16
BIOTERRORISM: PATHOGENS AS WEAPONS	Biowarfare has been used for centuries. The use of biological weapons in terrorism remains a threat. Biological weapons include infectious agents (pathogens) and toxins. The most devastating bioterrorism scenario would be the airborne dispersal of pathogens over a concentrated population area. Characteristics that make a specific pathogen a high-risk for bioterrorism include a low infective dose,…	2012	No									Anderson, Peter D, Bokor, Gyula	JOURNAL OF PHARMACY PRACTICE	25	5	521-9	Anthrax, Anti-Infective Agents, Biological Warfare Agents, Bioterrorism, Civil Defense, Education, Pharmacy, Continuing, Emergency Medicine, Humans, Pharmacists, Plague, Professional Role, Smallpox, United States	10.1177/0897190012456366	23011963	http://journals.sagepub.com/doi/abs/10.1177/0897190012456366?url_ver=Z39.88-2003&rfr_id=ori:rid:crossref.org&rfr_dat=cr_pub%3dpubmed
COXIELLA BURNETII ALTERS CYCLIC AMP-DEPENDENT PROTEIN KINASE SIGNALING DURING GROWTH IN MACROPHAGES	Coxiella burnetii is the bacterial agent of human Q fever, an acute, flu-like illness that can present as chronic endocarditis in immunocompromised individuals. Following aerosol-mediated transmission, C. burnetii replicates in alveolar macrophages in a unique phagolysosome-like parasitophorous vacuole (PV) required for survival. The mechanisms of C. burnetii intracellular survival are poorly def…	2012	No									MacDonald, LJ, Kurten, RC, Voth, DE	INFECTION AND IMMUNITY	80	6	1980-1986		10.1128/IAI.00101-12	22473604	http://iai.asm.org/cgi/pmidlookup?view=long&pmid=22473604
DETECTION OF COXIELLA BURNETII DNA IN INHALABLE AIRBORNE DUST SAMPLES FROM GOAT FARMS AFTER MANDATORY CULLING	Coxiella burnetii is thought to infect humans primarily via airborne transmission. However, air measurements of C. burnetii are sparse. We detected C. burnetii DNA in inhalable and PM10 (particulate matter with an aerodynamic size of 10 mu m or less) dust samples collected at three affected goat farms, demonstrating that low levels of C. burnetii DNA are present in inhalable size fractions.	2012	No									Hogerwerf, L, Borlee, F, Still, K, Heederik, D, van Rotterdam, B, de Bruin, A, Nielen, M, Wouters, IM	APPLIED AND ENVIRONMENTAL MICROBIOLOGY	78	15	5410-5412		10.1128/AEM.00677-12	22582072	http://aem.asm.org/cgi/pmidlookup?view=long&pmid=22582072
DETECTION OF COXIELLA BURNETII DNA ON SMALL-RUMINANT FARMS DURING A Q FEVER OUTBREAK IN THE NETHERLANDS	During large Q fever outbreaks in the Netherlands between 2007 and 2010, dairy goat farms were implicated as the primary source of human Q fever. The transmission of Coxiella burnetii to humans is thought to occur primarily via aerosols, although available data on C. burnetii in aerosols and other environmental matrices are limited. During the outbreak of 2009, 19 dairy goat farms and one dairy s…	2012	No									de Bruin, A, van der Plaats, RQJ, de Heer, L, Paauwe, R, Schimmer, B, Vellema, P, van Rotterdam, BJ, van Duynhoven, YTHP	APPLIED AND ENVIRONMENTAL MICROBIOLOGY	78	6	1652-1657		10.1128/AEM.07323-11	22247143	http://aem.asm.org/cgi/pmidlookup?view=long&pmid=22247143
DEVELOPMENT OF A METHOD FOR DETECTING COXIELLA BURNETII IN CHEESE SAMPLES	Coxiella burnetii is the causative agent of Q fever, and the main route of infection in humans is inhalation of contaminated aerosols. Although oral transmission by contaminated raw milk or dairy products is also a possible route of human infection, there have been few studies investigating the presence of C. burnetii in dairy products. We developed a new method of extracting DNA from cheese and …	2012	No									Hirai, A, Nakama, A, Chiba, T, Kai, A	JOURNAL OF VETERINARY MEDICAL SCIENCE	74	2	175-180	cheese, contamination, Coxiella burnetii, nested PCR	10.1292/jvms.11-0023	21979453	http://joi.jlc.jst.go.jp/JST.JSTAGE/jvms/11-0023?lang=en&from=PubMed
EPIDEMIOLOGICAL FACTORS ASSOCIATED WITH THE EXPOSURE OF CATTLE TO COXIELLA BURNETII IN THE MADRID REGION OF SPAIN	Domestic ruminants are considered to be the major source of Coxiella burnetii, the causative agent of Q fever. Even though Q fever is considered to be present worldwide, its distribution in many areas and countries remains unknown. Here, a serological assay was used to estimate the seroprevalence of C. burnetii in cattle in the Madrid region of Spain, to assess its spatial distribution, and to id…	2012	No									Alvarez, J, Perez, A, Mardones, FO, Perez-Sancho, M, Garcia-Seco, T, Pages, E, Mirat, F, Diaz, R, Carpintero, J, Dominguez, L	VETERINARY JOURNAL	194	1	102-107	Coxiella burnetii, ELISA, Prevalence, Risk factors, Madrid	10.1016/j.tyjl.2012.02.022	22534189	https://linkinghub.elsevier.com/retrieve/pii/S1090-0233(12)00092-5
GENOTYPIC DIVERSITY OF CLINICAL COXIELLA BURNETII ISOLATES FROM PORTUGAL BASED ON MST AND MLVA TYPING	The temporal and spatial diversity of Coxiella burnetii genotypes associated with human and animal disease in Portugal was analysed using a 6-locus multiple-locus variable-number tandem repeat analysis (MLVA) and a 10-locus multi-spacer sequence typing (MST) panel. Fifteen cultured C. burnetii isolates from 13 Q fever patients and a stillborn goat and 6 additional PCR-positive ruminant tissue sam…	2012	No									Santos, AS, Tilburg, JJHC, Botelho, A, Barahona, MJ, Nuncio, MS, Nabuurs-Franssen, MH, Klaassen, CHW	INTERNATIONAL JOURNAL OF MEDICAL MICROBIOLOGY	302	6	253-256	Coxiella burnetii, Human, Animal, MLVA, MST, Portugal	10.1016/j.ijmm.2012.08.003	23040417	https://linkinghub.elsevier.com/retrieve/pii/S1438-4221(12)00054-9
GENOTYPING OF COXIELLA BURNETII FROM DOMESTIC RUMINANTS IN NORTHERN SPAIN	Background: Information on the genotypic diversity of Coxiella burnetii isolates from infected domestic ruminants in Spain is limited. The aim of this study was to identify the C. burnetii genotypes infecting livestock in Northern Spain and compare them to other European genotypes. A commercial real-time PCR targeting the IS1111a insertion element was used to detect the presence of C. burnetii DN…	2012	No									Astobiza, I, Tilburg, JJHC, Pinero, A, Hurtado, A, Garcia-Perez, AL, Nabuurs-Franssen, MH, Klaassen, CHW	BMC VETERINARY RESEARCH	8		-	Q fever, Ruminants, Genotyping, MLVA, MST, Spain	10.1186/1746-6148-8-241	23227921	https://bmcvetres.biomedcentral.com/articles/10.1186/1746-6148-8-241
HISTORY AND PROSPECTS OF COXIELLA BURNETII RESEARCH	Coxiella burnetii, the causative agent of Q fever, is the only known intracellular pathogenic bacterium that replicates within the acidic, degradative confines of a eukaryotic phagolysosome. It appears that the bacterium nullifies or thwarts the toxic elements of this vacuole and evades both innate and adaptive immune responses. C. burnetii is ubiquitous in its geographic distribution with the di…	2012	No									Hechemy, KE	COXIELLA BURNETII: RECENT ADVANCES AND NEW PERSPECTIVES IN RESEARCH OF THE Q FEVER BACTERIUM	984		1-11	Q fever, Vaccine, Virulence, Epidemiology, Clinical diagnosis, Pathogenesis, Outbreak	10.1007/978-94-007-4315-1_1	22711624	https://dx.doi.org/10.1007/978-94-007-4315-1_1
INFLUENCE OF THE ENVIRONMENT AND OCCUPATIONAL EXPOSURE ON THE OCCURRENCE OF Q FEVER	Q fever, which is caused by Coxiella burnetii, is a worldwide zoonotic infectious disease and ruminants are the main reservoir for human infections. Humans become infected primarily by inhaling aerosols that are contaminated with C. burnetii. Ingestion (particularly drinking raw milk) and person-to-person transmission are minor routes. Animals shed the bacterium in urine and faeces, and in very h…	2012	No									Dorko, E, Rimarova, K, Pilipcinec, E	CENTRAL EUROPEAN JOURNAL OF PUBLIC HEALTH	20	3	208-214	Q fever Coxiella burnetii, environmental contamination, occupational exposure, preventive measures		23285522	http://apps.szu.cz/svi/cejph/show_en.php?kat=archiv/2012-3-06
PHYLOGENETIC DIVERSITY, VIRULENCE AND COMPARATIVE GENOMICS	Coxiella burnetii, the causative agent of Q fever, has remained a public health concern since the identification of this organism in 1935 by E. H. Derrick in Australia and at the Rocky Mountain Laboratory in the USA by H. R. Cox and G. Davis. Human Q fever has been described in most countries where C. burnetii is ubiquitous in the environment except in New Zealand where no cases have been describ…	2012	No									van Schaik, EJ, Samuel, JE	COXIELLA BURNETII: RECENT ADVANCES AND NEW PERSPECTIVES IN RESEARCH OF THE Q FEVER BACTERIUM	984		13-38	Coxiella burnetii, Isolates, Phylogeny, Genomics, Pathogenecity, Virulence, Virulence factors	10.1007/978-94-007-4315-1_2	22711625	https://dx.doi.org/10.1007/978-94-007-4315-1_2
PREVALENCE AND SPATIAL DISTRIBUTION OF ANTIBODIES TO BOVINE VIRAL DIARRHEA VIRUS AND COXIELLA BURNETII IN WHITE-TAILED DEER (ODOCOILEUS VIRGINIANUS) IN NEW YORK AND PENNSYLVANIA	Significant pathogens of domestic livestock and public-health related pathogens, such as bovine viral diarrhea virus (BVDV) and Coxiella burnetii, are commonly diagnosed in some wildlife species. BVDV is an economically important pathogen of domestic bovids and Coxiella burnetii is a highly infectious zoonotic bacterium. As a result of recent shifting patterns of disease, it is critical that base…	2012	No									Kirchgessner, MS, Dubovi, EJ, Porter, WF, Zylich, NC, Whipps, CM	JOURNAL OF ZOO AND WILDLIFE MEDICINE	43	3	466-472	Bovine viral diarrhea virus, Coxiella burnetii, New York, Odocoileus virginianus, Pennsylvania, white-tailed deer		23082509	http://www.bioone.org/doi/10.1638/2011-0049R.1?url_ver=Z39.88-2003&rfr_id=ori:rid:crossref.org&rfr_dat=cr_pub%3dpubmed
PREVALENCE OF COXIELLA BURNETII IN TICKS AFTER A LARGE OUTBREAK OF Q FEVER	Q fever has emerged as an important human and veterinary public health problem in the Netherlands with major outbreaks in three consecutive years. Goat farms are probably the prime source from which Coxiella burnetii have spread throughout the environment, infecting people living in the vicinity. Coxiella burnetii infection not only spilled over from animal husbandry to humans but could also have…	2012	No									Sprong, H, Tijsse-Klasen, E, Langelaar, M, De Bruin, A, Fonville, M, Gassner, F, Takken, W, Van Wieren, S, Nijhof, A, Jongejan, F, Maassen, CBM, Scholte, EJ, Hovius, JW, Hovius, KE, Spitalska, E, Van Duynhoven, YT	ZOONOSES AND PUBLIC HEALTH	59	1	69-75	Ixodes ricinus, ticks, Coxiella burnetii, ruminants, transmission	10.1111/j.1863-2378.2011.01421.x	21824373	http://dx.doi.org/10.1111/j.1863-2378.2011.01421.x
RICKETTSIAE OF SPOTTED FEVER GROUP, BORRELIA VALAISIANA, AND COXIELLA BURNETII IN TICKS ON PASSERINE BIRDS AND MAMMALS FROM THE CAMARGUE IN THE SOUTH OF FRANCE	Ticks are obligate hematophagous arthropods that have a limited mobility, but can be transported over large geographical distances. by wild and domestic mammals and birds. In this study, we analyze the presence of emerging zoonotic bacteria in ticks collected from passerine birds and mammals present in the Camargue, in the south of France, which is a major rallying point for birds migrating from …	2012	No									Socolovschi, C, Reynaud, P, Kernif, T, Raoult, D, Parola, P	TICKS AND TICK-BORNE DISEASES	3	5-6	354-359	Ticks, Passerine birds, Rickettsia, Borrelia, Camargue	10.1016/j.ttbdis.2012.10.019	23141104	https://linkinghub.elsevier.com/retrieve/pii/S1877-959X(12)00104-5
SCREENING-LEVEL RISK ASSESSMENT OF COXIELLA BURNETII (Q FEVER) TRANSMISSION VIA AERATION OF DRINKING WATER	A screening-level risk assessment of Q fever transmission through drinking water produced from groundwater in the vicinity of infected goat barnyards that employed aeration of the water was performed. Quantitative data from scientific literature were collected and a Quantitative Microbial Risk Assessment approach was followed. An exposure model was developed to calculate the dose to which consume…	2012	No									Sales-Ortells, H, Medema, G	ENVIRONMENTAL SCIENCE & TECHNOLOGY	46	7	4125-4133		10.1021/es203744g	22309101	https://dx.doi.org/10.1021/es203744g
SEEK AND YE SHALL FIND: A CASE OF Q FEVER IN AN ELDERLY WOMAN	This case report concerns an elderly woman referred with a 6-month history of rising and falling fever in the range 38-40 degrees C. She was examined repeatedly by her family doctor and given various antibiotic treatments before being hospitalized in our geriatric unit. Laboratory tests and microbiological studies led to a diagnosis of chronic Q fever, a zoonosis caused by Coxiella burnetii, a Gr…	2012	No									Ruggiero, E, Inelmen, EM, Grosso, G, Manzato, E	AGING CLINICAL AND EXPERIMENTAL RESEARCH	24	5	552-554	Misdiagnosis of Q fever, fever of unknown origin in elderly, comorbidities, preserving self-sufficiency	10.3275/8179	22170110	NA
SEROEPIDEMIOLOGY OF COXIELLA BURNETII IN WILD WHITE-TAILED DEER (ODOCOILEUS VIRGINIANUS) IN NEW YORK, UNITED STATES	Coxiella burnetii is an environmentally resistant bacterium that has been reported in wildlife populations. Frequent contact on pasture between white-tailed deer (Odocoileus virginianus) and cattle has been reported by farmers in the Northeast U.S., and transmission of C. burnetii is thought to occur between wild deer and domestic livestock such as cows, sheep, and goats. Blood samples were colle…	2012	No									Kirchgessner, MS, Dubovi, EJ, Whipps, CM	VECTOR-BORNE AND ZOONOTIC DISEASES	12	11	942-947	Cluster analysis, Coxiella, Deer, Q fever	10.1089/vbz.2011.0952	22989183	http://dx.doi.org/10.1089/vbz.2011.0952
SEROPREVALENCE AND RISK FACTORS FOR COXIELLA BURNETII (Q FEVER) SEROPOSITIVITY IN DAIRY GOAT FARMERS' HOUSEHOLDS IN THE NETHERLANDS, 2009-2010	Community Q fever epidemics occurred in the Netherlands in 2007-2009, with dairy goat and dairy sheep farms as the implicated source. The aim of the study was to determine the seroprevalence and risk factors for seropositivity in dairy goat farmers and their household members living or working on these farms. Sera of 268 people living or working on 111 dairy goat farms were tested for Coxiella bu…	2012	No									Schimmer, B, Lenferink, A, Schneeberger, P, Aangenend, H, Vellema, P, Hautvast, J, van Duynhoven, Y	PLOS ONE	7	7	-		10.1371/journal.pone.0042364	22848762	http://dx.plos.org/10.1371/journal.pone.0042364
THE 2007-2010 Q FEVER EPIDEMIC IN THE NETHERLANDS: CHARACTERISTICS OF NOTIFIED ACUTE Q FEVER PATIENTS AND THE ASSOCIATION WITH DAIRY GOAT FARMING	We describe the Q fever epidemic in the Netherlands with emphasis on the epidemiological characteristics of acute Q fever patients and the association with veterinary factors. Data from 3264 notifications for acute Q fever in the period from 2007 through 2009 were analysed. The patients most affected were men, smokers and persons aged 4060 years. Pneumonia was the most common clinical presentatio…	2012	No									Dijkstra, F, van der Hoek, W, Wijers, N, Schimmer, B, Rietveld, A, Wijkmans, CJ, Vellema, P, Schneeberger, PM	FEMS IMMUNOLOGY AND MEDICAL MICROBIOLOGY	64	1	3-12	Q fever, Coxiella burnetii, zoonosis, the Netherlands	10.1111/j.1574-695X.2011.00876.x	22066649	NA
TWO CASES OF ACUTE HEPATITIS ASSOCIATED WITH Q FEVER	Q fever which is caused by Coxiella burnetii, is a worldwide zoonosis. Many species of wild and domestic mammals, birds, and arthropods, are reservoirs of C.burnetii in nature, however farm animals are the most frequent sources of human infection. The most frequent way of transmission is by inhalation of contaminated aerosols. The clinical presentation of Q fever is polymorphic and nonspecific. Q…	2012	No									Yesilyurt, M, Kilic, S, Gursoy, B, Celebi, B, Yerer, M	MIKROBIYOLOJI BULTENI	46	3	480-487	Q fever, Coxiella burnetii, hepatitis, icterus, doxycycline		22951661	NA
ANIMAL MODELS OF Q FEVER (COXIELLA BURNETII)	Q fever, caused by the pathogen Coxiella burnetii, is an acute disease that can progress to become a serious chronic illness. The organism leads an obligate, intracellular lifecycle, during which it multiplies in the phagolytic compartments of the phagocytic cells of the immune system of its hosts. This characteristic makes study of the organism particularly difficult and is perhaps one of the re…	2013	No									Bewley, KR	COMPARATIVE MEDICINE	63	6	469-476			24326221	https://www.ingentaconnect.com/openurl?genre=article&issn=1532-0820&volume=63&issue=6&spage=469&aulast=Bewley
COMPUTATIONAL MODELING AND EXPERIMENTAL VALIDATION OF THE LEGIONELLA AND COXIELLA VIRULENCE-RELATED TYPE-IVB SECRETION SIGNAL	Legionella and Coxiella are intracellular pathogens that use the virulence-related Icm/Dot type-IVB secretion system to translocate effector proteins into host cells during infection. These effectors were previously shown to contain a C-terminal secretion signal required for their translocation. In this research, we implemented a hidden semi-Markov model to characterize the amino acid composition…	2013	No									Lifshitz, Z, Burstein, D, Peeri, M, Zusman, T, Schwartz, K, Shuman, HA, Pupko, T, Segal, G	PROCEEDINGS OF THE NATIONAL ACADEMY OF SCIENCES OF THE UNITED STATES OF AMERICA	110	8	E707-E715	pathogenomics, type-IV secretion, translocated substrates, Legionnaire disease, Q-fever	10.1073/pnas.1215278110	23382224	http://www.pnas.org/cgi/pmidlookup?view=long&pmid=23382224
COXIELLA BURNETII IN SEWAGE WATER AT SEWAGE WATER TREATMENT PLANTS IN A Q FEVER EPIDEMIC AREA	During 2007-2010, over 4000 persons in The Netherlands contracted Q-fever, a zoonosis caused by the bacterium Coxiella burnetii. Goats and sheep are the main reservoir of C. burnetti and infected animals shed the bacterium with their urine, faeces and birth products. Human infections may occur through direct contact with infected animals, or through inhalation of contaminated dust particles or ae…	2013	No									Schets, FM, de Heer, L, Husman, AMD	INTERNATIONAL JOURNAL OF HYGIENE AND ENVIRONMENTAL HEALTH	216	6	698-702	Q fever, Coxiella burnetii, Waste water, Sewage water treatment plants	10.1016/j.ijheh.2012.12.010	23347968	https://linkinghub.elsevier.com/retrieve/pii/S1438-4639(12)00146-0
COXIELLA BURNETII INTERACTION WITH NEUTROPHILS AND MACROPHAGES IN VITRO AND IN SCID MICE FOLLOWING AEROSOL INFECTION	Coxiella burnetii is an obligate intracellular bacterium that causes acute and chronic Q fever in humans. Human Q fever is mainly transmitted by aerosol infection. However, there is a fundamental gap in the knowledge regarding the mechanisms of pulmonary immunity against C. burnetii infection. This study focused on understanding the interaction between C. burnetii and innate immune cells in vitro…	2013	No									Elliott, A, Peng, Y, Zhang, GQ	INFECTION AND IMMUNITY	81	12	4604-4614		10.1128/IAI.00973-13	24082077	http://iai.asm.org/cgi/pmidlookup?view=long&pmid=24082077
DETECTION OF COXIELLA BURNETII DNA IN THE ENVIRONMENT DURING AND AFTER A LARGE Q FEVER EPIDEMIC IN THE NETHERLANDS	Aim To investigate the Coxiella burnetii DNA content in environmental samples that may contribute to the transmission of C.burnetii. Methods and Results During a large Q fever outbreak in the Netherlands, surface swabs and aerosol samples were collected inside stables and around six Q fever-affected ruminant farms, which are located in municipalities varying in Q fever incidence. After the outbre…	2013	No									de Bruin, A, Janse, I, Koning, M, de Heer, L, van der Plaats, RQJ, van Leuken, JPG, van Rotterdam, BJ	JOURNAL OF APPLIED MICROBIOLOGY	114	5	1395-1404	detection, molecular epidemiology, polymerase chain reaction (PCR), veterinary	10.1111/jam.12163	23398323	http://dx.doi.org/10.1111/jam.12163
DIAGNOSIS AND MANAGEMENT OF Q FEVER - UNITED STATES, 2013 RECOMMENDATIONS FROM CDC AND THE Q FEVER WORKING GROUP	Q fever, a zoonotic disease caused by the bacterium Coxiella burnetii, can cause acute or chronic illness in humans. Transmission occurs primarily through inhalation of aerosols from contaminated soil or animal waste. No licensed vaccine is available in the United States. Because many human infections result in nonspecific or benign constitutional symptoms, establishing a diagnosis of Q fever oft…	2013	No									Anderson, A, Bijlmer, H, Fournier, PE, Graves, S, Hartzell, J, Kersh, GJ, Limonard, G, Marrie, TJ, Massung, RF, McQuiston, JH, Nicholson, WL, Paddock, CD, Sexton, DJ	MMWR RECOMMENDATIONS AND REPORTS	62	3	1-28			23535757	https://www.cdc.gov/mmwr/preview/mmwrhtml/rr6203a1.htm
HUMAN DOSE RESPONSE RELATION FOR AIRBORNE EXPOSURE TO COXIELLA BURNETII	Background: The recent outbreak of Q fever in the Netherlands between 2007 and 2009 is the largest recorded Q fever outbreak. Exposure to Coxiella burnetii may cause Q fever but the size of the population exposed during the outbreak remained uncertain as little is known of the infectivity of this pathogen. The quantification of the infectiousness and the corresponding response is necessary for as…	2013	No									Brooke, RJ, Kretzschmar, MEE, Mutters, NT, Teunis, PF	BMC INFECTIOUS DISEASES	13		-	Q fever, Dose response, Challenge study, Risk analysis, Beta-poisson	10.1186/1471-2334-13-488	24138807	https://bmcinfectdis.biomedcentral.com/articles/10.1186/1471-2334-13-488
IMPLEMENTATION OF A Q FEVER VACCINATION PROGRAM FOR HIGH-RISK PATIENTS IN THE NETHERLANDS	Background: Between 2007 and 2011 the Netherlands was faced with an unprecedented Q fever outbreak with more than 4000 people affected. Dairy goats were considered the main source of infection. In addition to taking veterinary measures, the Dutch government offered an unlicensed vaccine against the causative bacterium Coxiella burnetii to patient groups at high-risk of Q fever complications. This…	2013	No									Isken, LD, Kraaij-Dirkzwager, M, Vermeer-de Bondt, PE, Rumke, HC, Wijkmans, C, Opstelten, W, Timen, A	VACCINE	31	23	2617-2622	Coxiella burnetii, Q fever vaccination, Implementation vaccination, Vaccination program, Q fever	10.1016/j.vaccine.2013.03.062	23583810	https://linkinghub.elsevier.com/retrieve/pii/S0264-410X(13)00408-8
INVESTIGATION OF COXIELLA BURNETII PREVALENCE IN WOMEN WHO HAD MISCARRIAGE AND THEIR SPOUSES BY SEROLOGICAL AND MOLECULAR METHODS	Coxiella burnetii is the causative agent of the common zoonotic disease known as Q fever. Human infection is mostly maintained by inhalation of contaminated aerosols that originate from infected birth products, milk and urine. Sexual transmission has also been reported. In pregnant women the disease causes abortion during the first trimester, while at later stages it tends to become chronic causi…	2013	No									Eyigor, M, Gultekin, B, Telli, M, Odabasi, AR, Yuksel, H, Sezer, SD, Aydin, N	MIKROBIYOLOJI BULTENI	47	2	324-331	Coxiella burnetii, Q fever, diagnosis, pregnancy, abortus, sexual partner		23621732	http://www.mikrobiyolbul.org/linkout.aspx?pmid=23621732
MEDICAL ASPECTS OF BIO-TERRORISM	Introduction: Bioterrorism is a terrorist action involving the intentional release or dissemination of a biological warfare agent (BWA), which includes some bacteria, viruses, rickettsiae, fungi or biological toxins. BWA is a naturally occurring or human-modified form that may kill or incapacitate humans, animals or plants as an act of war or terrorism. BWA is a weapon of choice for mass destruct…	2013	No									Balali-Mood, M, Moshiri, M, Etemad, L	TOXICON	69		131-142	Biotoxin, Bioterrorism, Biological warfare agent	10.1016/j.toxicon.2013.01.005	23339855	https://linkinghub.elsevier.com/retrieve/pii/S0041-0101(13)00023-8
NO EXCESS RISK OF ADVERSE PREGNANCY OUTCOMES AMONG WOMEN WITH SEROLOGICAL MARKERS OF PREVIOUS INFECTION WITH COXIELLA BURNETII: EVIDENCE FROM THE DANISH NATIONAL BIRTH COHORT	Background: Q fever caused by Coxiella burnetii is transmitted to humans by inhalation of aerosols from animal birth products. Q fever in pregnancy is suspected to be a potential cause of fetal and maternal morbidity and fetal mortality but the pathogenesis is poorly understood, and even in Q fever endemic areas, the magnitude of a potential association is not established. We aimed to examine if …	2013	No									Nielsen, SY, Andersen, AMN, Molbak, K, Hjollund, NH, Kantso, B, Krogfelt, KA, Henriksen, TB	BMC INFECTIOUS DISEASES	13		-	Q fever, Coxiella burnetii, Infection, Human, Pregnancy, Spontaneous abortion, Preterm birth	10.1186/1471-2334-13-87	23413787	https://bmcinfectdis.biomedcentral.com/articles/10.1186/1471-2334-13-87
PRESENCE AND PERSISTENCE OF COXIELLA BURNETII IN THE ENVIRONMENTS OF GOAT FARMS ASSOCIATED WITH A Q FEVER OUTBREAK	Q fever is a zoonotic disease caused by inhalation of the bacterium Coxiella burnetii. Ruminant livestock are common reservoirs for C. burnetii, and bacteria present in aerosols derived from the waste of infected animals can infect humans. The significance of infection from material deposited in the environment versus transmission directly from infected animals is not known. In 2011, an outbreak …	2013	No									Kersh, GJ, Fitzpatrick, KA, Self, JS, Priestley, RA, Kelly, AJ, Lash, RR, Marsden-Haug, N, Nett, RJ, Bjork, A, Massung, RF, Anderson, AD	APPLIED AND ENVIRONMENTAL MICROBIOLOGY	79	5	1697-1703		10.1128/AEM.03472-12	23315737	http://aem.asm.org/cgi/pmidlookup?view=long&pmid=23315737
Q FEVER, A ZOONOSIS OFTEN OVERLOOKED	Q fever is a zoonosis caused by an intracellular Gram-negative bacteria, Coxiella burnetii. Animals are the main reservoir and transmission to men generally is occurring by inhalation of contaminated aerosols. Acute Q fever generally is benign and usually resolves spontaneously. When symptomatic, the clinical presentation typically includes one of the following three syndromes: a flu-like illness…	2013	No									Delaloye, J, Greub, G	REVUE MEDICALE SUISSE	9	383	879-84	Animals, Anti-Bacterial Agents, Doxycycline, Enzyme Inhibitors, Humans, Hydroxychloroquine, Q Fever, Zoonoses		23697082	NA
RODENTS AS POTENTIAL COURIERS FOR BIOTERRORISM AGENTS	Many pathogens that can cause major public health, economic, and social damage are relatively easily accessible and could be used as biological weapons. Wildlife is a natural reservoir for many potential bioterrorism agents, and, as history has shown, eliminating a pathogen that has dispersed among wild fauna can be extremely challenging. Since a number of wild rodent species live close to humans…	2013	No									L��hmus, Mare, Janse, Ingmar, van de Goot, Frank, van Rotterdam, Bart J	BIOSECURITY AND BIOTERRORISM : BIODEFENSE STRATEGY, PRACTICE, AND SCIENCE	11 Suppl 1		S247-57	Animals, Biological Warfare Agents, Bioterrorism, Brucellosis, Communication, Disease Vectors, Hemorrhagic Fevers, Viral, Humans, Mice, Pest Control, Plague, Q Fever, Rats, Tularemia	10.1089/bsp.2012.0085	23971813	http://dx.doi.org/10.1089/bsp.2012.0085
SPOTTED FEVER GROUP RICKETTSIAE IN DERMACENTOR RETICULATUS AND HAEMAPHYSALIS PUNCTATA TICKS IN THE UK	Background: Spotted fever group (SFG) rickettsiae have recently been identified for the first time in UK ticks. This included the findings of Rickettsia helvetica in Ixodes ricinus and Rickettsia raoultii in Dermacentor reticulatus. This paper further investigates the occurrence of SFG rickettsiae in additional geographically distinct populations of D. reticulatus, and for the first time, investi…	2013	No									Tijsse-Klasen, E, Hansford, KM, Jahfari, S, Phipps, P, Sprong, H, Medlock, JM	PARASITES & VECTORS	6		-	Haemaphysalis, Rickettsia massiliae, UK, Dermacentor, Rickettsiae, Ticks	10.1186/1756-3305-6-212	23870197	https://parasitesandvectors.biomedcentral.com/articles/10.1186/1756-3305-6-212
VECTORBORNE DISEASES IN WEST AFRICA: GEOGRAPHIC DISTRIBUTION AND GEOSPATIAL CHARACTERISTICS	This paper provides an overview of the methods in which geographic information systems (GIS) and remote sensing (RS) technology have been used to visualise and analyse data related to vectorborne diseases (VBD) in West Africa and to discuss the potential for these approaches to be routinely included in future studies of VBDs. GIS/RS studies of diseases that are associated with a specific geograph…	2013	No									Ratmanov, P, Mediannikov, O, Raoult, D	TRANSACTIONS OF THE ROYAL SOCIETY OF TROPICAL MEDICINE AND HYGIENE	107	5	273-284	Epidemiology, Vectorborne diseases, Spatial analysis, Geographic information systems, Remote sensing, West Africa	10.1093/trstmh/trt020	23479360	https://academic.oup.com/trstmh/article-lookup/doi/10.1093/trstmh/trt020
ACUTE Q FEVER AMONG FEBRILE PATIENTS IN ZAHEDAN, SOUTHEASTERN IRAN	So far, few studies have been conducted on Q fever in Iran. The objective of this study was to determine the frequency of acute Q fever in febrile patients admitted to Boo-Ali Hospital in Zahedan (southeastern Iran)., In this study, 105 febrile patients suspected ofhaving brucellosis were examined using indirect immunofluorescent assay kit for the detection of Coxiella burnetii IgM and IgG phase …	2014	No									Metanat, Maliheh, Sepehri Rad, Nahid, Alavi-Naini, Roya, Shahreki, Shahram, Sharifi-Mood, Batool, Akhavan, Aida, Poormontaseri, Zahra	TURKISH JOURNAL OF MEDICAL SCIENCES	44	1	99-103	Acute Disease, Adult, Female, Humans, Iran, Male, Middle Aged, Prevalence, Q Fever		25558567	NA
CHARACTERIZATION OF A LIPOPOLYSACCHARIDE-TARGETED MONOCLONAL ANTIBODY AND ITS VARIABLE FRAGMENTS AS CANDIDATES FOR PROPHYLAXIS AGAINST THE OBLIGATE INTRACELLULAR BACTERIAL PATHOGEN COXIELLA BURNETII	Our previous study demonstrated that treatment of Coxiella burnetii with the phase I lipopolysaccharide (PI-LPS)-targeted monoclonal antibody (MAb) 1E4 significantly inhibited C. burnetii infection in mice, suggesting that 1E4 is a protective MAb. To determine whether passive transfer of antibodies (Abs) can provide protection against C. burnetii natural infection, we examined if passive transfer…	2014	No									Peng, Y, Schoenlaub, L, Elliott, A, Mitchell, WJ	INFECTION AND IMMUNITY	82	11	4530-4541		10.1128/IAI.01695-14	25114119	http://iai.asm.org/cgi/pmidlookup?view=long&pmid=25114119
CLIMATE CHANGE AND INFECTIOUS DISEASES IN THE ARCTIC: ESTABLISHMENT OF A CIRCUMPOLAR WORKING GROUP	The Arctic, even more so than other parts of the world, has warmed substantially over the past few decades. Temperature and humidity influence the rate of development, survival and reproduction of pathogens and thus the incidence and prevalence of many infectious diseases. Higher temperatures may also allow infected host species to survive winters in larger numbers, increase the population size a…	2014	No									Parkinson, Alan J, Evengard, Birgitta, Semenza, Jan C, Ogden, Nicholas, B��rresen, Malene L, Berner, Jim, Brubaker, Michael, Sj��stedt, Anders, Evander, Magnus, Hondula, David M, Menne, Bettina, Pshenichnaya, Natalia, Gounder, Prabhu, Larose, Tricia, Revich, Boris, Hueffer, Karsten, Albihn, Ann	INTERNATIONAL JOURNAL OF CIRCUMPOLAR HEALTH	73		25163	Animals, Arctic Regions, Climate Change, Communicable Disease Control, Communicable Diseases, Environmental Health, Female, Health Planning, Humans, Male, Program Evaluation, Risk Assessment, Zoonoses	10.3402/ijch.v73.25163	25317383	http://www.tandfonline.com/doi/full/10.3402/ijch.v73.25163
CLINICAL CHARACTERISTICS OF Q FEVER AND ETIOLOGY OF COMMUNITY-ACQUIRED PNEUMONIA IN A TROPICAL REGION OF SOUTHERN TAIWAN: A PROSPECTIVE OBSERVATIONAL STUDY	The clinical characteristics of Q fever are poorly identified in the tropics. Fever with pneumonia or hepatitis are the dominant presentations of acute Q fever, which exhibits geographic variability. In southern Taiwan, which is located in a tropical region, the role of Q fever in community-acquired pneumonia (CAP) has never been investigated., During the study period, May 2012 to April 2013, 166…	2014	No									Lai, Chung-Hsu, Chang, Lin-Li, Lin, Jiun-Nong, Chen, Wei-Fang, Wei, Yu-Feng, Chiu, Chien-Tung, Wu, Jiun-Ting, Hsu, Chi-Kuei, Chen, Jung-Yueh, Lee, Ho-Sheng, Lin, Hsi-Hsun, Chen, Yen-Hsu	PLOS ONE	9	7	e102808	Adult, Community-Acquired Infections, Female, Humans, Male, Middle Aged, Pneumonia, Prospective Studies, Q Fever, Retrospective Studies, Taiwan	10.1371/journal.pone.0102808	25033402	http://dx.plos.org/10.1371/journal.pone.0102808
COXIELLA BURNETII IN WILDLIFE AND TICKS IN AN ENDEMIC AREA	Background: Ticks are considered to be a natural reservoir of Coxiella burnetii and are responsible for the spread of infection in wild animals and for the transmission to domestic animals. More than 40 tick species are naturally infected with C. burnetii. In Cyprus, few studies have been carried out on the distribution and incidence of C. burnetii infection in wildlife and the threat that infect…	2014	No									Psaroulaki, A, Chochlakis, D, Angelakis, E, Ioannou, I, Tselentis, Y	TRANSACTIONS OF THE ROYAL SOCIETY OF TROPICAL MEDICINE AND HYGIENE	108	10	625-631	Coxiella burnetii, Birds, Cyprus, Ticks, Wildlife	10.1093/trstmh/tru134	25163752	https://academic.oup.com/trstmh/article-lookup/doi/10.1093/trstmh/tru134
COXIELLA BURNETII SEROPREVALENCE AND RISK FACTORS ON COMMERCIAL SHEEP FARMS IN THE NETHERLANDS	Coxiella burnetii seroprevalence was assessed on Dutch dairy and non-dairy sheep farms using ELISA. Risk factors for seropositivity on non-dairy sheep farms were identified at farm and sheep level by univariate and multivariate multilevel analyses. Based on 953 dairy and 5671 non-dairy serum samples, sheep seroprevalences were 18.7 per cent and 2.0 per cent, respectively, and 78.6 per cent and 30…	2014	No									Schimmer, B, de Lange, MMA, Hautvast, JLA, Vellema, P, van Duynhoven, YTHP	VETERINARY RECORD	175	1	17-+		10.1136/vr.102155	24789854	http://veterinaryrecord.bmj.com/cgi/pmidlookup?view=long&pmid=24789854
DRAFT GENOME SEQUENCES OF SIX RUMINANT COXIELLA BURNETII ISOLATES OF EUROPEAN ORIGIN	Coxiella burnetii is responsible for Q fever, a worldwide zoonosis attributed to the inhalation of aerosols contaminated by livestock birth products. Six draft genome sequences of European C.��burnetii isolates from ruminants are presented here. The availability of these genomes will help in understanding the potential host specificity and pathogenicity and in identifying pertinent markers for su…	2014	No									Sidi-Boumedine, Karim, Ellis, Richard J, Adam, Gilbert, Prigent, Myriam, Angen, Oystein, Asp��n, Anna, Thi��ry, Richard, Rousset, Elodie	GENOME ANNOUNCEMENTS	2	3			10.1128/genomeA.00285-14	24831135	NA
EMERGENCE OF COXIELLA BURNETII IN RUMINANTS ON REUNION ISLAND? PREVALENCE AND RISK FACTORS	Q fever is a widespread zoonosis that is caused by Coxiella burnetii (C. burnetii), and ruminants are identified as the main sources of human infections. Some human cases have been described, but very limited information was available about Q fever in ruminants on Reunion Island, a tropical island in the Indian Ocean. A cross-sectional study was undertaken from March 2011 to August 2012 to assess…	2014	No									Cardinale, E, Esnault, O, Beral, M, Naze, F, Michault, A	PLOS NEGLECTED TROPICAL DISEASES	8	8	-		10.1371/journal.pntd.0003055	25101780	http://dx.plos.org/10.1371/journal.pntd.0003055
EXPOSURE AND RISK FACTORS TO COXIELLA BURNETII, SPOTTED FEVER GROUP AND TYPHUS GROUP RICKETTSIAE, AND BARTONELLA HENSELAE AMONG VOLUNTEER BLOOD DONORS IN NAMIBIA	Background: The role of pathogen-mediated febrile illness in sub-Saharan Africa is receiving more attention, especially in Southern Africa where four countries (including Namibia) are actively working to eliminate malaria. With a high concentration of livestock and high rates of companion animal ownership, the influence of zoonotic bacterial diseases as causes of febrile illness in Namibia remain…	2014	No									Noden, BH, Tshavuka, FI, van der Colf, BE, Chipare, I, Wilkinson, R	PLOS ONE	9	9	-		10.1371/journal.pone.0108674	25259959	http://dx.plos.org/10.1371/journal.pone.0108674
HIGH PREVALENCE AND TWO DOMINANT HOST-SPECIFIC GENOTYPES OF COXIELLA BURNETII IN US MILK	Background: Coxiella burnetii causes Q fever in humans and Coxiellosis in animals; symptoms range from general malaise to fever, pneumonia, endocarditis and death. Livestock are a significant source of human infection as they shed C. burnetii cells in birth tissues, milk, urine and feces. Although prevalence of C. burnetii is high, few Q fever cases are reported in the U.S. and we have a limited …	2014	No									Pearson, T, Hornstra, HM, Hilsabeck, R, Gates, LT, Olivas, SM, Birdsell, DM, Hall, CM, German, S, Cook, JM, Seymour, ML, Priestley, RA, Kondas, AV, Clark, CL, Friedman, CLC, Price, EP, Schupp, JM, Liu, CM, Price, LB, Massung, RF, Kersh, GJ, Keim, P	BMC MICROBIOLOGY	14		-	Coxiella burnetii, Q fever, Environmental detection, Genotyping, Phylogeography, Multispacer typing, SNP typing, Canonical SNP, CanSNP	10.1186/1471-2180-14-41	24533573	https://bmcmicrobiol.biomedcentral.com/articles/10.1186/1471-2180-14-41
HUMAN SPOTTED FEVER GROUP RICKETTSIOSES ARE UNDERAPPRECIATED IN SOUTHERN TAIWAN, PARTICULARLY FOR THE SPECIES CLOSELY-RELATED TO RICKETTSIA FELIS	Background: Despite increased identification of spotted fever group rickettsioses (SFGR) in animals and arthropods, human SFGR are poorly characterized in Taiwan. Methods: Patients with suspected Q fever, scrub typhus, murine typhus, leptospirosis, and dengue fever from April 2004 to December 2009 were retrospectively investigated for SFGR antibodies (Abs). Sera were screened for Rickettsia ricke…	2014	No									Lai, CH, Chang, LL, Lin, JN, Tsai, KH, Hung, YC, Kuo, LL, Lin, HH, Chen, YH	PLOS ONE	9	4	-		10.1371/journal.pone.0095810	24755560	http://dx.plos.org/10.1371/journal.pone.0095810
MOLECULAR ANALYSIS OF COXIELLA BURNETII IN GERMANY REVEALS EVOLUTION OF UNIQUE CLONAL CLUSTERS	The causative agent of Q fever, Coxiella burnetii, is a query agent occurring naturally all over the world. We studied 104 German Coxiella burnetti strains/DNA samples obtained between 1969 and 2011 using a 14 microsatellite marker Multiple-locus variable-number of tandem repeat (VNTR) analysis (MLVA) technique. We were able to divide our collection into 32 different genotypes clustered into four…	2014	No									Frangoulidis, D, Walter, MC, Antwerpen, M, Zimmermann, P, Janowetz, B, Alex, M, Bottcher, J, Henning, K, Hilbert, A, Ganter, M, Runge, M, Munsterkotter, M, Splettstoesser, WD, Hanczaruk, M	INTERNATIONAL JOURNAL OF MEDICAL MICROBIOLOGY	304	7	868-876	Q fever, Typing, Molecular epidemiology, Germany, MLVA, VNTR	10.1016/j.ijmm.2014.06.011	25037926	https://linkinghub.elsevier.com/retrieve/pii/S1438-4221(14)00080-0
PERSISTENT HIGH ANTIBODY TITRES AGAINST COXIELLA BURNETII AFTER ACUTE Q FEVER NOT EXPLAINED BY CONTINUED EXPOSURE TO THE SOURCE OF INFECTION: A CASE-CONTROL STUDY	Background: From 2007 to 2010, (the southern part of) the Netherlands experienced a large Q fever epidemic, with more than 4,000 reported symptomatic cases. Approximately 1 - 5% of the acute Q fever patients develop chronic Q fever. A high IgG antibody titre against phase I of Coxiella burnetii during follow-up is considered a marker of chronic Q fever. However, there is uncertainty about the sig…	2014	No									Jajou, R, Wielders, CCH, Leclercq, M, van Leuken, J, Shamelian, S, Renders, N, van der Hoek, W, Schneeberger, P	BMC INFECTIOUS DISEASES	14		-	Coxiella burnetii, Q fever, The Netherlands, Chronic, Distance	10.1186/s12879-014-0629-6	25421141	https://bmcinfectdis.biomedcentral.com/articles/10.1186/s12879-014-0629-6
PROGRESSION OF COXIELLA BURNETII INFECTION AFTER IMPLEMENTING A TWO-YEAR VACCINATION PROGRAM IN A NATURALLY INFECTED DAIRY CATTLE HERD	Background: The high prevalence of Coxiella burnetii infection in dairy cattle herds recently reported and the long survival tune of the bacterium in the environment pose a risk to human and animal health that calls for the implementation of control measures at herd level. This study presents the results of a 2-year vaccination program with an inactivated phase 1 vaccine in a Spanish dairy herd n…	2014	No									Pinero, A, Barandika, JE, Hurtado, A, Garcia-Perez, AL	TIERAERZTLICHE UMSCHAU	69	12	522-+	Coxiella burnetii, cattle, vaccination, environment, control		NA	NA
Q FEVER - AN OCCUPATIONAL DISEASE LEADING TO DISABILITY - CASE REPORT	Q fever is a zoonosis caused by the bacterium Coxiella burnetii. The infection results from inhalation of infected droplets or aerosols. The most frequent sources in the Czech Republic are sheep, horses, cattles, goats, and pigs. Frequently, the disease is deemed occupational, with male sex being a risk factor for its symptomatic form. Presented is a case of a 27-year-old male diagnosed with a ch…	2014	No									Nakl��dalov��, M, Pastorkov��, R, Landeck��, I	EPIDEMIOLOGIE, MIKROBIOLOGIE, IMUNOLOGIE : CASOPIS SPOLECNOSTI PRO EPIDEMIOLOGII A MIKROBIOLOGII CESKE LEKARSKE SPOLECNOSTI J.E. PURKYNE	63	2	149-52	Adult, Animals, Disabled Persons, Humans, Male, Occupational Diseases, Q Fever, Zoonoses		25025682	http://www.prolekare.cz/linkout/49189
Q FEVER RISK ACROSS A DYNAMIC, HETEROGENEOUS LANDSCAPE IN LAIKIPIA COUNTY, KENYA	Two hundred fourteen serosamples were collected from four livestock species across five ranches in Laikipia County, Kenya. Serological analysis for Coxiella burnetii (the causative agent for Q fever) showed a distinct seroprevalence gradient: the lowest in cattle, higher in sheep and goats, and the highest in camels. Laikipia-wide aerial counts show a recent increase in the camel population. One …	2014	No									DePuy, W, Benka, V, Massey, A, Deem, SL, Kinnaird, M, O'Brien, T, Wanyoike, S, Njoka, J, Butt, B, Foufopoulos, J, Eisenberg, JNS, Hardin, R	ECOHEALTH	11	3	429-433	Q fever, C. burnetii, Laikipia County, Kenya, Livestock, Camels, Zoonotic pathogen	10.1007/s10393-014-0924-0	24604546	https://dx.doi.org/10.1007/s10393-014-0924-0
RELATIVE CONTRIBUTIONS OF NEIGHBOURHOOD AND ANIMAL MOVEMENTS TO COXIELLA BURNETII INFECTION IN DAIRY CATTLE HERDS	Q fever in dairy cattle herds occurs mainly after inhalation of contaminated aerosols generated from excreta by shedder animals. Propagation of Coxiella burnetii, the cause of the disease between ruminant herds could result from transmission between neighbouring herds and/or the introduction of infected shedder animals in healthy herds. The objective of this study were (i) to describe the spatial…	2014	No									Nusinovici, S, Hoch, T, Widgren, S, Joly, A, Lindberg, A, Beaudeau, F	GEOSPATIAL HEALTH	8	2	471-477	Q fever, epidemiology, risk factor, spatial clustering, control measures, France, Sweden		24893024	https://dx.doi.org/10.4081/gh.2014.36
RISK ASSESSMENT OF FLAVIVIRUS TRANSMISSION IN NAMIBIA	The role of arboviruses causing acute febrile illness in sub-Saharan Africa is receiving more attention. Reports of dengue in tourists were published nearly 10 years ago in Namibia, but the current epidemiology of arboviruses is unknown and surveys of mosquito vectors have not been carried out since the 1950s. To begin addressing this knowledge gap, a prospective cross-sectional study was conduct…	2014	No									Noden, BH, Musuuo, M, Aku-Akai, L, van der Colf, B, Chipare, I, Wilkinson, R	ACTA TROPICA	137		123-129	Dengue virus, Flavivirus, Seroprevalence, Aedes, Culex, Namibia	10.1016/j.actatropica.2014.05.010	24865792	https://linkinghub.elsevier.com/retrieve/pii/S0001-706X(14)00175-2
SURVEYS ON COXIELLA BURNETII INFECTIONS IN SWEDISH CATTLE, SHEEP, GOATS AND MOOSE	Background: Q fever is a zoonotic disease caused by the bacterium Coxiella burnetii. Prevalence data in ruminant species are important to support risk assessments regarding public and animal health. The aim was to investigate the presence of or exposure to C. burnetii in cattle, sheep, goats and moose, and to compare two enzyme-linked immunosorbent assays (ELISAs). National surveys of antibodies …	2014	No									Ohlson, A, Malmsten, J, Frossling, J, Bolske, G, Aspan, A, Dalin, AM, Lindberg, A	ACTA VETERINARIA SCANDINAVICA	56		-	Coxiella burnetii, Surveillance, Epidemiology, Cattle, Goat, Sheep, Moose, Cervids, Antibodies, Test evaluation	10.1186/1751-0147-56-39	25007979	https://actavetscand.biomedcentral.com/articles/10.1186/1751-0147-56-39
THE RISE AND CONTROL OF THE 2007-2012 HUMAN Q FEVER OUTBREAKS IN THE NETHERLANDS	Q fever is an almost ubiquitous zoonosis caused by Coxiella burnetii, which is able to infect several animal species, as well as people. Cattle, sheep and goats are the primary animal reservoirs. In small ruminants, an infection may result in abortion and stillbirth. Infected animals can shed the organism in faeces, milk and mainly in foetal membranes and foetal fluids. Transmission to humans mai…	2014	No									Vellema, P, van den Brom, R	SMALL RUMINANT RESEARCH	118	1-3	69-78	Q fever, Coxiella burnetii, Sheep, Goat, The Netherlands	10.1016/j.smallrumres.2013.12.006	NA	NA
ZOONOSES IN GOATS: HOW TO CONTROL THEM	Zoonoses are infections that spread naturally from animals to humans. Most of the zoonoses diagnosed in goats are transmitted by close contact of man with goats and are occupational diseases that principally affect breeders, veterinarians and slaughterhouse workers. Others are airborne diseases and affect people living in the vicinity of caprine herds. But some of them are foodborne diseases whic…	2014	No									Rodolakis, A	SMALL RUMINANT RESEARCH	121	1	12-20	Zoonoses, Prevention, Control, Brucellosis, Chlamydiosis, Q fever, Rift Valley Fever	10.1016/j.smallrumres.2014.01.007	NA	NA
A REVIEW OF BACK-CALCULATION TECHNIQUES AND THEIR POTENTIAL TO INFORM MITIGATION STRATEGIES WITH APPLICATION TO NON-TRANSMISSIBLE ACUTE INFECTIOUS DISEASES	Back-calculation is a process whereby generally unobservable features of an event leading to a disease outbreak can be inferred either in real-time or shortly after the end of the outbreak. These features might include the time when persons were exposed and the source of the outbreak. Such inferences are important as they can help to guide the targeting of mitigation strategies and to evaluate th…	2015	No									Egan, JR, Hall, IM	JOURNAL OF THE ROYAL SOCIETY INTERFACE	12	106	-	infectious disease outbreaks, infectious disease incubation period, likelihood functions, dose-response relationship, host-pathogen interactions	10.1098/rsif.2015.0096	NA	NA
A WINDY DAY IN A SHEEP SALEYARD: AN OUTBREAK OF Q FEVER IN RURAL SOUTH AUSTRALIA	In December 2004, the Department of Human Services investigated an outbreak of Q fever in South Australia. A case-control study tested an association between attending a local saleyard and human illness. A case was defined as a person with clinical illness and evidence of seroconversion or high phase II IgM. Controls were selected from a database of community controls matched on sex, age group an…	2015	No									O'Connor, BA, Tribe, IG, Givney, R	EPIDEMIOLOGY AND INFECTION	143	2	391-398	Outbreaks, Q fever, zoonoses	10.1017/S0950268814001083	24814266	https://www.cambridge.org/core/product/identifier/S0950268814001083/type/journal_article
ARMIES OF PESTILENCE: CNS INFECTIONS AS POTENTIAL WEAPONS OF MASS DESTRUCTION	Infectious agents have been investigated, developed, and used by both governments and terrorist groups as weapons of mass destruction. CNS infections, though traditionally considered less often than respiratory diseases in this scenario, may be very important. Viruses responsible for encephalitides can be highly infectious in aerosol form. CNS involvement in anthrax is ominous but should change t…	2015	No									Hart, B L, Ketai, L	AJNR. AMERICAN JOURNAL OF NEURORADIOLOGY	36	6	1018-25	Biological Warfare, Central Nervous System Infections, Humans, Weapons of Mass Destruction	10.3174/ajnr.A4177	25477355	http://www.ajnr.org/cgi/pmidlookup?view=long&pmid=25477355
BRUCELLA AND COXIELLA; IF YOU DON'T LOOK, YOU DON'T FIND	Brucella and Coxiella are similar; both are obligate intracellular, zoonotic pathogens with a broad geographic distribution. Infection in animals is usually asymptomatic, but causes fetal loss and therefore has significant economic impact. Human infection may be asymptomatic or give rise to either organ-specific or multi-system disease. Organism culture is challenging for Coxiella and can lack se…	2015	No									Lambourne, JR, Brooks, T	CLINICAL MEDICINE	15	1	91-92			25650208	http://www.clinmed.rcpjournal.org/cgi/pmidlookup?view=long&pmid=25650208
COXIELLA BURNETII INFECTIONS IN SHEEP OR GOATS: AN OPINIONATED REVIEW	Q fever is an almost ubiquitous zoonosis caused by Coxiella burnetii, which is able to infect several animal species, as well as humans. Cattle, sheep and goats are the primary animal reservoirs. In small ruminants, infections are mostly without clinical symptoms, however, abortions and stillbirths can occur, mainly during late pregnancy. Shedding of C. burnetii occurs in feces, milk and, mostly,…	2015	No									Van den Brom, R, van Engelen, E, Roest, HIJ, van der Hoek, W, Vellema, P	VETERINARY MICROBIOLOGY	181	1-2	119-129	Coxiella burnetii, Goat, Q fever, Sheep, Zoonosis	10.1016/j.vetmic.2015.07.011	26315774	https://linkinghub.elsevier.com/retrieve/pii/S0378-1135(15)00273-4
DETECTION OF COXIELLA BURNETII IN DAIRY CATTLE BULK TANK MILK AND SINGLE TANK MILK SAMPLES BY CONFIRMATORY TESTING	Q fever is a worldwide zoonotic disease caused by the pathogen Coxiella (C.) burnetii. A wide range of animal species is susceptible to this intracellular bacterium with great importance in ruminants. Human infections occur mainly by airborne transmission. C. burnetii was detected in animal products such as raw milk, raw-milk cheese and butter prepared from raw milk as well as in the meat of infe…	2015	No									Hilbert, A, Andres, T, Werner, R, Wehr, R, Frohlich, A, Conraths, FJ, Henning, K	BERLINER UND MUNCHENER TIERARZTLICHE WOCHENSCHRIFT	128	7-8	271-277	Coxiella burnetii, alimentary transmission, milk study	10.2376/0005-9366-128-271	26281438	NA
EARLY CYTOKINE AND ANTIBODY RESPONSES AGAINST COXIELLA BURNETII IN AEROSOL INFECTION OF BALB/C MICE	Coxiella burnetii, a Gram-negative intracellular bacterium, can give rise to Q fever in humans and is transmitted mainly by inhalation of infected aerosols from animal reservoirs. Serology is commonly used to diagnose Q fever, but the early cellular immune response-i.e., C. burnetii-specific interferon gamma (IFN-gamma) production in response to antigen challenge might be an additional diagnostic…	2015	No									Schoffelen, T, Self, JS, Fitzpatrick, KA, Netea, MG, van Deuren, M, Joosten, LAB, Kersh, GJ	DIAGNOSTIC MICROBIOLOGY AND INFECTIOUS DISEASE	81	4	234-239	Coxiella burnetii, Q fever, Cellular immunity, Serology, Interferon-gamma, Cytokines	10.1016/j.diagmicrobio.2014.12.008	25618420	https://linkinghub.elsevier.com/retrieve/pii/S0732-8893(14)00518-5
ESTIMATED HERD PREVALENCE AND SEQUENCE TYPES OF COXIELLA BURNETII IN BULK TANK MILK SAMPLES FROM COMMERCIAL DAIRIES IN INDIANA	Background: Coxiella burnetii is the etiologic agent of Q fever, a zoonotic disease causing influenza-like illness, pregnancy loss, cardiovascular disease and chronic fatigue syndrome in people. C. burnetii is considered to be enzootic in ruminants, but clinical signs of infection do not always manifest. National studies have documented the presence of C. burnetii in dairy herds in Indiana. This …	2015	No									Bauer, AE, Olivas, S, Cooper, M, Hornstra, H, Keim, P, Pearson, T, Johnson, AJ	BMC VETERINARY RESEARCH	11		-		10.1186/s12917-015-0517-3	26248712	https://bmcvetres.biomedcentral.com/articles/10.1186/s12917-015-0517-3
EXPOSURE TO LOW DOSES OF COXIELLA BURNETII CAUSED HIGH ILLNESS ATTACK RATES: INSIGHTS FROM COMBINING HUMAN CHALLENGE AND OUTBREAK DATA	Background: As a major zoonotic pathogen, characterization of the infectivity and pathogenicity of Coxiella burnetii is essential to understand Q-fever epidemiology. Objectives: We want to extend a recently published human dose response model based on experimental challenge of young adult males to include other age groups and both genders. Additionally, we can estimate the spatial distribution of…	2015	No									Brooke, RJ, Mutters, NT, Peter, O, Kretzschmar, MEE, Teunis, PFM	EPIDEMICS	11		1-6	Q-fever, Coxiella burnetii, Outbreak, Dose response, Exposure estimates	10.1016/j.epidem.2014.12.004	25979276	https://linkinghub.elsevier.com/retrieve/pii/S1755-4365(14)00073-5
HOST AND ENVIRONMENTAL FACTORS MODULATE THE EXPOSURE OF FREE-RANGING AND FARMED RED DEER (CERVUS ELAPHUS) TO COXIELLA BURNETII	The control of multihost pathogens, such as Coxiella burnetii, should rely on accurate information about the roles played by the main hosts. We aimed to determine the involvement of the red deer (Cervus elaphus) in the ecology of C. burnetii. We predicted that red deer populations from broad geographic areas within a European context would be exposed to C. burnetii, and therefore, we hypothesized…	2015	No									Gonzalez-Barrio, D, Avila, ALV, Boadella, M, Beltran-Beck, B, Barasona, JA, Santos, JPV, Queiros, J, Garcia-Perez, AL, Barral, M, Ruiz-Fons, F	APPLIED AND ENVIRONMENTAL MICROBIOLOGY	81	18	6223-6231		10.1128/AEM.01433-15	26150466	http://aem.asm.org/cgi/pmidlookup?view=long&pmid=26150466
IDENTIFICATION OF ELPA, A COXIELLA BURNETII PATHOTYPE-SPECIFIC DOT/ICM TYPE IV SECRETION SYSTEM SUBSTRATE	Coxiella burnetii causes human Q fever, a zoonotic disease that presents with acute flu-like symptoms and can result in chronic life-threatening endocarditis. In human alveolar macrophages, C. burnetii uses a Dot/Icm type IV secretion system (T4SS) to generate a phagolysosome-like parasitophorous vacuole (PV) in which to replicate. The T4SS translocates effector proteins, or substrates, into the …	2015	No									Graham, JG, Winchell, CG, Sharma, UM, Voth, DE	INFECTION AND IMMUNITY	83	3	1190-1198		10.1128/IAI.02855-14	25605765	http://iai.asm.org/cgi/pmidlookup?view=long&pmid=25605765
IMPROVED CORRELATION OF HUMAN Q FEVER INCIDENCE TO MODELLED C-BURNETII CONCENTRATIONS BY MEANS OF AN ATMOSPHERIC DISPERSION MODEL	Background: Atmospheric dispersion models (ADMs) may help to assess human exposure to airborne pathogens. However, there is as yet limited quantified evidence that modelled concentrations are indeed associated to observed human incidence. Methods: We correlated human Q fever (caused by the bacterium Coxiella burnetii) incidence data in the Netherlands to modelled concentrations from three spatial…	2015	No									van Leuken, JPG, van de Kassteele, J, Sauter, FJ, van der Hoek, W, Heederik, D, Havelaar, AH, Swart, AN	INTERNATIONAL JOURNAL OF HEALTH GEOGRAPHICS	14		-	Pathogens, Q fever, Atmospheric dispersion modelling, Airborne, Coxiella burnetii, Model comparison, Meteorological	10.1186/s12942-015-0003-y	25888858	https://ij-healthgeographics.biomedcentral.com/articles/10.1186/s12942-015-0003-y
INDUSTRIAL FOOD ANIMAL PRODUCTION AND COMMUNITY HEALTH	Industrial food animal production (IFAP) is a source of environmental microbial and chemical hazards. A growing body of literature suggests that populations living near these operations and manure-applied crop fields are at elevated risk for several health outcomes. We reviewed the literature published since 2000 and identified four health outcomes consistently and positively associated with livi…	2015	No									Casey, Joan A, Kim, Brent F, Larsen, Jesper, Price, Lance B, Nachman, Keeve E	CURRENT ENVIRONMENTAL HEALTH REPORTS	2	3	259-71	Air Pollution, Animal Husbandry, Animals, Asthma, Environmental Microbiology, Humans, Livestock, Manure, Poultry, Public Health, Risk Factors, Rural Population, Zoonoses	10.1007/s40572-015-0061-0	26231503	https://dx.doi.org/10.1007/s40572-015-0061-0
MICROEVOLUTION OF AEDES AEGYPTI	Scientific research into the epidemiology of dengue frequently focuses on the microevolution and dispersion of the mosquito Aedes aegypti. One of the world's largest urban agglomerations infested by Ae. aegypti is the Brazilian megalopolis of Sao Paulo, where >26,900 cases of dengue were reported until June 2015. Unfortunately, the dynamics of the genetic variability of Ae. aegypti in the Sao Pau…	2015	No									Louise, C, Vidal, PO, Suesdek, L	PLOS ONE	10	9	-		10.1371/journal.pone.0137851	26360876	http://dx.plos.org/10.1371/journal.pone.0137851
NEUTROPHILS PLAY AN IMPORTANT ROLE IN PROTECTIVE IMMUNITY AGAINST COXIELLA BURNETII INFECTION	Coxiella burnetii is an obligate intracellular Gram-negative bacterium that causes the zoonotic disease Q fever. Although Q fever is mainly transmitted by aerosol infection, study of the immune responses in the lung following pulmonary C. burnetii infection is lacking. Neutrophils are considered the first immune cell to migrate into the lung and play an important role in host defense against aero…	2015	No									Elliott, Alexandra, Schoenlaub, Laura, Freches, Danielle, Mitchell, William, Zhang, Guoquan	INFECTION AND IMMUNITY	83	8	3104-13	Animals, Coxiella burnetii, Female, Humans, Interleukin-1, Interleukin-17, Lung, Mice, Mice, Inbred BALB C, Neutrophils, Q Fever, Receptors, Interleukin-8B	10.1128/IAI.00042-15	26015476	http://iai.asm.org/cgi/pmidlookup?view=long&pmid=26015476
PRIORITISATION OF WILDLIFE PATHOGENS TO BE TARGETED IN EUROPEAN SURVEILLANCE PROGRAMMES: EXPERT-BASED RISK ANALYSIS FOCUS ON RUMINANTS	This study attempted to develop a list of priority pathogens. It is part of a European Union (EU) project dedicated to the surveillance of emerging or re-emerging pathogens of wildlife. Partners of the consortium established an initial list of 138 pathogens of concern, which was reduced to a smaller list of 65 pathogens likely to affect ruminants (i.e., the most costly animal group in the EU over…	2015	No									Ciliberti, A, Gavier-Widen, D, Yon, L, Hutchings, MR, Artois, M	PREVENTIVE VETERINARY MEDICINE	118	4	271-284	Europe, Prioritisation, Risk analysis, Ruminants, Surveillance, Wildlife	10.1016/j.prevetmed.2014.11.021	25496774	https://linkinghub.elsevier.com/retrieve/pii/S0167-5877(14)00411-5
Q FEVER INFECTION IN DAIRY CATTLE HERDS: INCREASED RISK WITH HIGH WIND SPEED AND LOW PRECIPITATION	Ruminants are considered the main reservoir for transmission of Coxiella burnetii (Cb) to humans. The implementation of effective control measures against Cb in ruminants requires knowledge about potential risk factors. The objectives of this study were (i) to describe the spatial distribution of Q fever-infected dairy cattle herds in Sweden, (ii) to quantify the respective contributions of wind …	2015	No									Nusinovici, S, Frossling, J, Widgren, S, Beaudeau, F, Lindberg, A	EPIDEMIOLOGY AND INFECTION	143	15	3316-3326	Control measure, precipitation, Q fever, risk factor, wind	10.1017/S0950268814003926	25783480	https://www.cambridge.org/core/product/identifier/S0950268814003926/type/journal_article
Q FEVER THROUGH CONSUMPTION OF UNPASTEURISED MILK AND MILK PRODUCTS - A RISK PROFILE AND EXPOSURE ASSESSMENT	Q fever is a zoonotic disease caused by the bacterium Coxiella burnetii which is endemic in cattle, sheep and goats in much of the world, including the United Kingdom (UK). There is some epidemiological evidence that a small proportion of cases in the developed world may arise from consumption of unpasteurised milk with less evidence for milk products such as cheese. Long maturation at low pH may…	2015	No									Gale, P, Kelly, L, Mearns, R, Duggan, J, Snary, EL	JOURNAL OF APPLIED MICROBIOLOGY	118	5	1083-1095	cheese, Coxiella burnetii, exposure, Q fever, risk assessment, transmission, unpasteurised milk	10.1111/jam.12778	25692216	http://dx.doi.org/10.1111/jam.12778
SEROPREVALENCE AND OCCUPATIONAL RISK SURVEY FOR COXIELLA BURNETII AMONG EXPOSED WORKERS IN SICILY, SOUTHERN ITALY	Objectives: The aim of this survey was to assess the seroprevalence of antibodies against Coxiella burnetii (C. burnetii) in subjects at risk of exposure in Sicily, Southern Italy. Material and Methods: Prevalence of IgG antibodies to C. burnetii phase II antigens was evaluated by ELISA in a group of 140 workers at risk of exposure (38 veterinarians, 38 slaughterhouse workers, 44 livestock handle…	2015	No									Fenga, C, Gangemi, S, de Luca, A, Calimeri, S, lo Giudice, D, Pugliese, M, Licitra, F, Alibrandi, A, Costa, C	INTERNATIONAL JOURNAL OF OCCUPATIONAL MEDICINE AND ENVIRONMENTAL HEALTH	28	5	901-907	Seroprevalence, Coxiella burnetii, Occupational hazard, Anthropozoonosis, Health surveillance, Prevention		26224501	https://dx.doi.org/10.13075/ijomeh.1896.00448
THE IMPORTANCE OF TICKS IN Q FEVER TRANSMISSION: WHAT HAS (AND HAS NOT) BEEN DEMONSTRATED?	Q fever is a widespread zoonotic disease caused by Coxiella burnetii, a ubiquitous intracellular bacterium infecting humans and a variety of animals. Transmission is primarily but not exclusively airborne, and ticks are usually thought to act as vectors. We argue that, although ticks may readily transmit C. burnetii in experimental systems, they only occasionally transmit the pathogen in the fiel…	2015	No									Duron, O, Sidi-Boumedine, K, Rousset, E, Moutailler, S, Jourdain, E	TRENDS IN PARASITOLOGY	31	11	536-552		10.1016/j.pt.2015.06.014	26458781	https://linkinghub.elsevier.com/retrieve/pii/S1471-4922(15)00151-8
TICK SPECIES (ACARI: IXODIDA) IN ANTALYA CITY, TURKEY: SPECIES DIVERSITY AND SEASONAL ACTIVITY	Ticks (Acari: Ixodida) are an important group of ectoparasites of vertebrates. Most species are known vectors of diseases including Lyme disease, Q fever, and Crimean-Congo hemorrhagic fever. A 3-year research was conducted in Antalya, Turkey, to determine tick species composition, seasonal abundance, and spatial distribution. The study was carried out in five districts (Aksu, DosemealtA +/-, Kep…	2015	No									Koc, S, Aydin, L, Cetin, H	PARASITOLOGY RESEARCH	114	7	2581-2586	Antalya, Seasonal distribution, Species composition, Ticks, Turkey	10.1007/s00436-015-4462-7	25869959	https://dx.doi.org/10.1007/s00436-015-4462-7
VALIDATION STUDY FOR USING LAB-ON-CHIP TECHNOLOGY FOR COXIELLA BURNETII MULTI-LOCUS-VNTR-ANALYSIS (MLVA) TYPING: APPLICATION FOR STUDYING GENOTYPIC DIVERSITY OF STRAINS FROM DOMESTIC RUMINANTS IN FRANCE	Coxiella burnetii, the etiologic bacterium of Q fever zoonosis, is still difficult to control. Ruminants are often carriers and involved in human epidemics. MLVA is a promising genotyping method for molecular epidemiology. Different techniques are used to resolve the MLVA band profiles such as electrophoresis on agarose gels, capillary electrophoresis or using the microfluidic Lab-on-Chip system.…	2015	No									Prigent, M, Rousset, E, Yang, E, Thiery, R, Sidi-Boumedine, K	MICROBES AND INFECTION	17	11-12	782-788		10.1016/j.micinf.2015.09.026	26482502	https://linkinghub.elsevier.com/retrieve/pii/S1286-4579(15)00220-8
WHOLE GENOME PCR SCANNING (WGPS) OF COXIELLA BURNETII STRAINS FROM RUMINANTS	Coxiella burnetii is the causative agent of Q fever, a zoonosis that spreads from ruminants to humans via the inhalation of aerosols contaminated by livestock's birth products. This study aimed to compare the genomes of strains isolated from ruminants by " Whole Genome PCR Scanning (WGPS)" in order to identify genomic differences. C. burnetii isolated from different ruminant hosts were compared t…	2015	No									Sidi-Boumedine, K, Adam, G, Angen, O, Aspan, A, Bossers, A, Roest, HJ, Prigent, M, Thiery, R, Rousset, E	MICROBES AND INFECTION	17	11-12	772-775	Coxiella burnetii, Q fever, Zoonosis, Whole Genome PCR Scanning, WGPS, Genomic comparison	10.1016/j.micinf.2015.08.003	26315064	https://linkinghub.elsevier.com/retrieve/pii/S1286-4579(15)00163-X
WIND-MEDIATED SPREAD OF LOW-PATHOGENIC AVIAN INFLUENZA VIRUS INTO THE ENVIRONMENT DURING OUTBREAKS AT COMMERCIAL POULTRY FARMS	Avian influenza virus-infected poultry can release a large amount of virus-contaminated droppings that serve as sources of infection for susceptible birds. Much research so far has focused on virus spread within flocks. However, as fecal material or manure is a major constituent of airborne poultry dust, virus-contaminated particulate matter from infected flocks may be dispersed into the environm…	2015	No									Jonges, M, van Leuken, J, Wouters, I, Koch, G, Meijer, A, Koopmans, M	PLOS ONE	10	5	-		10.1371/journal.pone.0125401	25946115	http://dx.plos.org/10.1371/journal.pone.0125401
ZOONOTIC RISKS FROM SMALL RUMINANTS	Zoonoses are infections that spread naturally between species (sometimes by a vector) from animals to other animal species or to humans or from humans to animals. Most of the zoonoses diagnosed in sheep and goats are transmitted by close contact of man with these animals and are, more often, occupational diseases that principally affect breeders, veterinarians and/or slaughterhouse workers. Some …	2015	No									Ganter, M	VETERINARY MICROBIOLOGY	181	1-2	53-65	BSE, Brucellosis, Chlamydophila, Coxiella, Goat, Orf, Q fever, Sheep, Transmissible Encephalopathy, Zoonoses	10.1016/j.vetmic.2015.07.015	26275853	https://linkinghub.elsevier.com/retrieve/pii/S0378-1135(15)00277-1
ANALYSIS OF REPRODUCTIVE PARAMETERS AND EVALUATION OF RISK FACTORS FOR Q FEVER IN DAIRY HERDS	Introduction - Q fever is a zoonosis caused by an obligate intracellular Gram-negative bacterium, Coxiella burnetii, and it is diffused throughout the world. The microorganism is able to survive in the environment despite temperature changes and desiccation, and to elude the host immune response. Q fever is typically transmitted by inhalation of contaminated aerosols, and the shedding of the bact…	2016	No									Miotto, S, Minozzi, G, Valla, G, Piccinini, R	LARGE ANIMAL REVIEW	22	3	109-113	Q fever, dairy cow, zoonosis, risk factors, days open		NA	NA
CLIMATE CHANGE EFFECTS ON AIRBORNE PATHOGENIC BIOAEROSOL CONCENTRATIONS: A SCENARIO ANALYSIS	The most recent IPCC report presented further scientific evidence for global climate change in the twenty-first century. Important secondary effects of climate change include those on water resource availability, agricultural yields, urban healthy living, biodiversity, ecosystems, food security, and public health. The aim of this explorative study was to determine the range of expected airborne p…	2016	No									van Leuken, JPG, Swart, AN, Droogers, P, van Pul, A, Heederik, D, Havelaar, AH	AEROBIOLOGIA	32	4	607-617	Coxiella burnetii, Q fever, Temperature, Global radiation, Wind, Precipitation, Atmospheric dispersion modelling	10.1007/s10453-016-9435-5	27890966	NA
COXIELLA BURNETII INFECTION IN A COMMUNITY OPERATING A LARGE-SCALE COW AND GOAT DAIRY, MISSOURI, 2013	Coxiella burnetii is a zoonotic pathogen that causes Q fever in humans and is transmitted primarily from infected goats, sheep, or cows. Q fever typically presents as an acute febrile illness; however, individuals with certain predisposing conditions, including cardiac valvulopathy, are at risk for chronic Q fever, a serious manifestation that may present as endocarditis. In response to a cluster…	2016	No									Biggs, HM, Turabelidze, G, Pratt, D, Todd, SR, Jacobs-Slifka, K, Drexler, NA, McCurdy, G, Lloyd, J, Evavold, CL, Fitzpatrick, KA, Priestley, RA, Singleton, J, Sun, D, Tang, M, Kato, C, Kersh, GJ, Anderson, A	AMERICAN JOURNAL OF TROPICAL MEDICINE AND HYGIENE	94	3	525-531		10.4269/ajtmh.15-0726	26811433	http://www.ajtmh.org/content/journals/10.4269/ajtmh.15-0726?crawler=true&mimetype=application/pdf
DETECTION OF COXIELLA BURNETII IN AMBIENT AIR AFTER A LARGE Q FEVER OUTBREAK	One of the largest Q fever outbreaks ever occurred in the Netherlands from 2007-2010, with 25 fatalities among 4,026 notified cases. Airborne dispersion of Coxiella burnetii was suspected but not studied extensively at the time. We investigated temporal and spatial variation of Coxiella burnetii in ambient air at residential locations in the most affected area in the Netherlands (the South-East),…	2016	No									de Rooij, MMT, Borlee, F, Smit, LAM, de Bruin, A, Janse, I, Heederik, DJJ, Wouters, IM	PLOS ONE	11	3	-		10.1371/journal.pone.0151281	26991094	http://dx.plos.org/10.1371/journal.pone.0151281
DEVELOPMENT OF AN EX VIVO TISSUE PLATFORM TO STUDY THE HUMAN LUNG RESPONSE TO COXIELLA BURNETII	Coxiella burnetii is an intracellular bacterial pathogen that causes human Q fever, an acute debilitating flu-like illness that can also present as chronic endocarditis. Disease typically occurs following inhalation of contaminated aerosols, resulting in an initial pulmonary infection. In human cells, C. burnetii generates a replication niche termed the parasitophorous vacuole (PV) by directing f…	2016	No									Graham, JG, Winchell, CG, Kurten, RC, Voth, DE	INFECTION AND IMMUNITY	84	5	1438-1445		10.1128/IAI.00012-16	26902725	http://iai.asm.org/cgi/pmidlookup?view=long&pmid=26902725
EVALUATION OF PATIENTS WITH COMMUNITY-ACQUIRED PNEUMONIA CAUSED BY ZOONOTIC PATHOGENS IN AN AREA WITH A HIGH DENSITY OF ANIMAL FARMS	Intensive animal farming could potentially lead to outbreaks of infectious diseases. Clinicians are at the forefront of detecting unusual diseases, but the lack of specificity of zoonotic disease symptoms makes this a challenging task. We evaluated patients with community-acquired pneumonia (CAP) with known and unknown aetiology in an area with a high livestock density and a potential association…	2016	No									Huijskens, EGW, Smit, LAM, Rossen, JWA, Heederik, D, Koopmans, M	ZOONOSES AND PUBLIC HEALTH	63	2	160-166	Zoonosis, community-acquired pneumonia, respiratory pathogens, Coxiella burnetii, geographic information system	10.1111/zph.12218	26214299	http://dx.doi.org/10.1111/zph.12218
GENOTYPES OF COXIELLA BURNETII IN WILDLIFE: DISENTANGLING THE MOLECULAR EPIDEMIOLOGY OF A MULTI-HOST PATHOGEN	Evidences point to a relevant role of wildlife in the ecology of Coxiella burnetii worldwide. The lack of information on C. burnetii genotypes in wildlife prevents tracing-back clinical animal and human Q fever cases with potential wildlife origin. To compare C. burnetii genotypes circulating in wildlife, livestock and humans, 107 samples from red deer, European wild rabbit, racoon, small mammals…	2016	No									Gonzalez-Barrio, D, Jado, I, Fernandez-de-Mera, IG, Fernandez-Santos, MD, Rodriguez-Vargas, M, Garcia-Amil, C, Beltran-Beck, B, Anda, P, Ruiz-Fons, F	ENVIRONMENTAL MICROBIOLOGY REPORTS	8	5	708-714		10.1111/1758-2229.12431	NA	NA
GENOTYPING AND AXENIC GROWTH OF COXIELLA BURNETII ISOLATES FOUND IN THE UNITED STATES ENVIRONMENT	Coxiella burnetii is a gram-negative bacterium that is the etiologic agent of the zoonotic disease Q fever. Common reservoirs of C. burnetii include sheep, goats, and cattle. These animals shed C. burnetii into the environment, and humans are infected by inhalation of aerosols. A survey of 1622 environmental samples taken across the United States in 2006-2008 found that 23.8% of the samples conta…	2016	No									Kersh, GJ, Priestley, RA, Hornstra, HM, Self, JS, Fitzpatrick, KA, Biggerstaff, BJ, Keim, P, Pearson, T, Massung, RF	VECTOR-BORNE AND ZOONOTIC DISEASES	16	9	588-594	Coxiella, genetics, reservoir host, Q fever, zoonotic	10.1089/vbz.2016.1972	27304166	http://dx.doi.org/10.1089/vbz.2016.1972
HUMAN Q FEVER INCIDENCE IS ASSOCIATED TO SPATIOTEMPORAL ENVIRONMENTAL CONDITIONS	Airborne pathogenic transmission from sources to humans is characterised by atmospheric dispersion and influence of environmental conditions on deposition and reaerosolisation. We applied a One Health approach using human, veterinary and environmental data regarding the 2009 epidemic in The Netherlands, and investigated whether observed human Q fever incidence rates were correlated to environment…	2016	No									Van Leuken, J P G, Swart, A N, Brandsma, J, Terink, W, Van de Kassteele, J, Droogers, P, Sauter, F, Havelaar, A H, Van der Hoek, W	ONE HEALTH (AMSTERDAM, NETHERLANDS)	2		77-87		10.1016/j.onehlt.2016.03.004	28616479	https://linkinghub.elsevier.com/retrieve/pii/S2352-7714(16)30007-6
MASSIVE DISPERSAL OF COXIELLA BURNETII AMONG CATTLE ACROSS THE UNITED STATES	Q-fever is an underreported disease caused by the bacterium Coxiella burnetii, which is highly infectious and has the ability to disperse great distances. It is a completely clonal pathogen with low genetic diversity and requires whole-genome analysis to identify discriminating features among closely related isolates. C. burnetii, and in particular one genotype (ST20), is commonly found in cow's …	2016	No									Olivas, Sonora, Hornstra, Heidie, Priestley, Rachael A, Kaufman, Emily, Hepp, Crystal, Sonderegger, Derek L, Handady, Karthik, Massung, Robert F, Keim, Paul, Kersh, Gilbert J, Pearson, Talima	MICROBIAL GENOMICS	2	8	e000068		10.1099/mgen.0.000068	28348863	NA
MEDITERRANEAN SPOTTED FEVER-LIKE ILLNESS IN SARDINIA, ITALY: A CLINICAL AND MICROBIOLOGICAL STUDY	Rickettsioses represent a group of emerging infectious diseases in Europe. Climate changes and the anthropization of rural environment have favored vectors' biological cycle and geographic spread. In Sardinia, Mediterranean spotted fever (MSF) is endemic and represents an important public health problem., We investigated the etiology and the clinical presentation of MSF-like illness in northern S…	2016	No									Madeddu, Giordano, Fiore, Vito, Mancini, Fabiola, Caddeo, Antonello, Ciervo, Alessandra, Babudieri, Sergio, Masala, Giovanna, Bagella, Paola, Nunnari, Giuseppe, Rezza, Giovanni, Mura, Maria Stella	INFECTION	44	6	733-738	Adult, Aged, Boutonneuse Fever, DNA, Bacterial, Female, Humans, Italy, Male, Middle Aged, Rickettsia conorii	10.1007/s15010-016-0921-z	27380385	https://dx.doi.org/10.1007/s15010-016-0921-z
MOLECULAR DETECTION OF VECTOR-BORNE PATHOGENS IN WILD AND DOMESTIC CARNIVORES AND THEIR TICKS AT THE HUMAN-WILDLIFE INTERFACE	Urbanization of natural areas is considered one of the causes of the current apparent emergence of infectious diseases. Carnivores are among the species that adapt well to urban and periurban environments, facilitating cross-species disease transmission with domestic dogs and cats, and potentially with their owners. The prevalence of vector-borne pathogens (VBP) of zoonotic and veterinary interes…	2016	No									Millan, J, Proboste, T, de Mera, IGF, Chirife, AD, de la Fuente, J, Altet, L	TICKS AND TICK-BORNE DISEASES	7	2	284-290	Babesiosis, Cat-scratch disease, Spotted-fever illness, Tick-borne diseases	10.1016/j.ttbdis.2015.11.003	26643497	https://linkinghub.elsevier.com/retrieve/pii/S1877-959X(15)30036-4
MOUSE MODEL OF COXIELLA BURNETII AEROSOLIZATION	Coxiella burnetii is mainly transmitted by aerosols and is responsible for multiple-organ lesions. Animal models have shown C. burnetii pathogenicity, but long-term outcomes still need to be clarified. We used a whole-body aerosol inhalation exposure system to mimic the natural route of infection in immunocompetent (BALB/c) and severe combined immunodeficient (SCID) mice. After an initial lung in…	2016	No									Melenotte, C, Lepidi, H, Nappez, C, Bechah, Y, Audoly, G, Terras, J, Raoult, D, Bregeon, F	INFECTION AND IMMUNITY	84	7	2116-2123		10.1128/IAI.00108-16	27160294	http://iai.asm.org/cgi/pmidlookup?view=long&pmid=27160294
MURINE ALVEOLAR MACROPHAGES ARE HIGHLY SUSCEPTIBLE TO REPLICATION OF COXIELLA BURNETII PHASE II IN VITRO	Coxiella burnetii is a Gram-negative bacterium that causes Q fever in humans. Q fever is an atypical pneumonia transmitted through inhalation of contaminated aerosols. In mammalian lungs, C. burnetii infects and replicates in several cell types, including alveolar macrophages (AMs). The innate immunity and signaling pathways operating during infection are still poorly understood, in part because …	2016	No									Fernandes, TD, Cunha, LD, Ribeiro, JM, Massis, LM, Lima, DS, Newton, HJ, Zamboni, DS	INFECTION AND IMMUNITY	84	9	2439-2448		10.1128/IAI.00411-16	27297388	http://iai.asm.org/cgi/pmidlookup?view=long&pmid=27297388
OCCURRENCE OF COXIELLA BURNETII IN GOAT AND EWE UNPASTEURIZED CHEESES: SCREENING AND GENOTYPING	Q fever is a zoonosis caused by Coxiella burnetii which infects humans as well as several animal species; sheep, goats and cattle are the primary animal reservoir. The main route of human exposure to Coxiella burnetii is inhalation of contaminated aerosols from excreta, especially birth products, while the role of unpasteurized dairy products in the transmission of Q fever to humans remains still…	2016	No									Galiero, A, Fratini, F, Camma, C, Di Domenico, M, Curini, V, Baronti, I, Turchi, B, Cerri, D	INTERNATIONAL JOURNAL OF FOOD MICROBIOLOGY	237		47-54	Coxiella burnetii, Cheese, Small ruminants, PCR, Multispacer sequence typing, Tuscany	10.1016/j.ijfoodmicro.2016.08.008	27543815	https://linkinghub.elsevier.com/retrieve/pii/S0168-1605(16)30411-1
ONE HEALTH APPROACH TO CONTROLLING A Q FEVER OUTBREAK ON AN AUSTRALIAN GOAT FARM	A recent outbreak of Q fever was linked to an intensive goat and sheep dairy farm in Victoria, Australia, 2012-2014. Seventeen employees and one family member were confirmed with Q fever over a 28-month period, including two culture-positive cases. The outbreak investigation and management involved a One Health approach with representation from human, animal, environmental and public health. Sero…	2016	No									Bond, KA, Vincent, G, Wilks, CR, Franklin, L, Sutton, B, Stenos, J, Cowan, R, Lim, K, Athan, E, Harris, O, Macfarlane-Berry, L, Segal, Y, Firestone, SM	EPIDEMIOLOGY AND INFECTION	144	6	1129-1141	Public health emerging infections, Q fever	10.1017/S0950268815002368	26493615	http://journals.cambridge.org/abstract_S0950268815002368
Q FEVER SEROPREVALENCE AND RISK FACTORS IN SHEEP AND GOATS IN NORTHWEST ITALY	Q fever is a zoonosis caused by the bacterium Coxiella burnetii; domestic ruminants, mainly goats and sheep, are the main source of Q fever outbreaks in humans. From both a public and an animal health perspective, providing reliable prevalence data is extremely relevant for the decision processes by policymakers and food producer organizations. Information on Q fever seroprevalence in small rumin…	2016	No									Rizzo, Francesca, Vitale, Nicoletta, Ballardini, Marco, Borromeo, Vitaliano, Luzzago, Camilla, Chiavacci, Laura, Mandola, Maria Lucia	PREVENTIVE VETERINARY MEDICINE	130		10-7	Animals, Antibodies, Bacterial, Coxiella burnetii, Cross-Sectional Studies, Enzyme-Linked Immunosorbent Assay, Female, Goat Diseases, Goats, Italy, Logistic Models, Male, Prevalence, Q Fever, Risk Factors, Seroepidemiologic Studies, Sheep, Sheep Diseases, Spatial Analysis	10.1016/j.prevetmed.2016.05.014	27435642	https://linkinghub.elsevier.com/retrieve/pii/S0167-5877(16)30156-8
SEROLOGICAL SURVEY USING ELISA TO DETERMINE THE PREVALENCE OF COXIELLA BURNETII INFECTION (Q FEVER) IN SHEEP AND GOATS IN GREAT BRITAIN	A survey of Coxiella burnetii infection (Q fever) in sheep flocks and goat herds in Great Britain was undertaken. A total of 5791 sheep (384 flocks) and 522 goats (145 herds) were examined for C. burnetii antibodies using an ELISA. Overall, 53 sheep (37 flocks), and four goats (four herds), tested positive. Estimates of individual animal, between-flock/-herd and within-flock/-herd crude prevalenc…	2016	No									Lambton, SL, Smith, RP, Gillard, K, Horigan, M, Farren, C, Pritchard, GC	EPIDEMIOLOGY AND INFECTION	144	1	19-24	Goats, Q fever, sheep, surveillance, zoonoses	10.1017/S0950268815000874	25990008	https://www.cambridge.org/core/product/identifier/S0950268815000874/type/journal_article
SPREAD OF COXIELLA BURNETII BETWEEN DAIRY CATTLE HERDS IN AN ENZOOTIC REGION: MODELLING CONTRIBUTIONS OF AIRBORNE TRANSMISSION AND TRADE	Q fever, a worldwide zoonotic disease caused by Coxiella burnetii, is a looming concern for livestock and public health. Epidemiological features of inter-herd transmission of C. burnetii in cattle herds by wind and trade of cows are poorly understood. We present a novel dynamic spatial model describing the inter-herd regional spread of C. burnetii in dairy cattle herds, quantifying the ability o…	2016	No									Pandit, P, Hoch, T, Ezanno, P, Beaudeau, F, Vergu, E	VETERINARY RESEARCH	47		-		10.1186/s13567-016-0330-4	27048416	https://veterinaryresearch.biomedcentral.com/articles/10.1186/s13567-016-0330-4
THE ECOLOGICAL NICHE OF DERMACENTOR MARGINATUS IN GERMANY	The ixodid tick Dermacentor marginatus (Sulzer, 1776) is endemic throughout southern Europe in the range of 33-51 (��) N latitude. In Germany, however, D. marginatus was exclusively reported in the Rhine valley and adjacent areas. Its northern distribution limit near Giessen is located at the coordinates 8.32 (��) E/50.65 (��) N. Particularly with regard to the causative agents of rickettsioses, …	2016	No									Walter, Melanie, Brugger, Katharina, Rubel, Franz	PARASITOLOGY RESEARCH	115	6	2165-74	Altitude, Animals, Climate, Dermacentor, Ecology, Ecosystem, Environment, Female, Geography, Germany, Male, Q Fever, Rickettsia Infections, Temperature, Tick-Borne Diseases, Tularemia	10.1007/s00436-016-4958-9	26993325	https://dx.doi.org/10.1007/s00436-016-4958-9
THE SERO-EPIDEMIOLOGY OF COXIELLA BURNETII IN HUMANS AND CATTLE, WESTERN KENYA: EVIDENCE FROM A CROSS-SECTIONAL STUDY	Evidence suggests that the intracellular bacterial pathogen Coxiella burnetii (which causes Q fever) is widespread, with a near global distribution. While there has been increasing attention to Q fever epidemiology in high-income settings, a recent systematic review highlighted significant gaps in our understanding of the prevalence, spatial distribution and risk factors for Q fever infection acr…	2016	No									Wardrop, NA, Thomas, LF, Cook, EAJ, de Glanville, WA, Atkinson, PM, Wamae, CN, Fevre, EM	PLOS NEGLECTED TROPICAL DISEASES	10	10	-		10.1371/journal.pntd.0005032	27716804	http://dx.plos.org/10.1371/journal.pntd.0005032
VASODILATOR-STIMULATED PHOSPHOPROTEIN ACTIVITY IS REQUIRED FOR COXIELLA BURNETII GROWTH IN HUMAN MACROPHAGES	Coxiella burnetii is an intracellular bacterial pathogen that causes human Q fever, an acute flu-like illness that can progress to chronic endocarditis and liver and bone infections. Humans are typically infected by aerosol-mediated transmission, and C. burnetii initially targets alveolar macrophages wherein the pathogen replicates in a phagolysosome-like niche known as the parasitophorous vacuol…	2016	No									Colonne, PM, Winchell, CG, Graham, JG, Onyilagha, FI, MacDonald, LJ, Doeppler, HR, Storz, P, Kurten, RC, Beare, PA, Heinzen, RA, Voth, DE	PLOS PATHOGENS	12	10	-		10.1371/journal.ppat.1005915	27711191	http://dx.plos.org/10.1371/journal.ppat.1005915
A RAPID BIO-OPTICAL SENSOR FOR DIAGNOSING Q FEVER IN CLINICAL SPECIMENS	Recent zoonotic outbreaks, such as Zika, Middle East Respiratory Syndrome, and Ebola, have highlighted the need for rapid and accurate diagnostic assays that can be used to aid pathogen control. Q-fever is a zoonotic disease caused by the transmission of Coxiella burnetii that can cause serious illness in humans via aerosols and is considered a potential bioterrorism agent. However the existing a…	2017	No									Koo, Bonhan, Jin, Choong Eun, Park, Se Yoon, Lee, Tae Yoon, Nam, Jeonghun, Jang, Young-Rock, Kim, Sun Mi, Kim, Ji Yeun, Kim, Sung-Han, Shin, Yong	JOURNAL OF BIOPHOTONICS					10.1002/jbio.201700167	29024445	http://dx.doi.org/10.1002/jbio.201700167
AN INTEGRATED STUDY OF HUMAN AND ANIMAL INFECTIOUS DISEASE IN THE LAKE VICTORIA CRESCENT SMALL-HOLDER CROP-LIVESTOCK PRODUCTION SYSTEM, KENYA	Background: The neglected zoonotic diseases (NZD) are an understudied group that are a major cause of illness throughout the developing world. In general, little is known about the prevalence and burden of NZDs in affected communities, particularly in relation to other infectious diseases with which they are often co-endemic. We describe the design and descriptive epidemiological outputs from an …	2017	No									Fevre, EM, de Glanville, WA, Thomas, LF, Cook, EAJ, Kariuki, S, Wamae, CN	BMC INFECTIOUS DISEASES	17		-	Zoonoses, One health, Taenia, Coxiella, Mycobacterium, Brucella, Kenya	10.1186/s12879-017-2559-6	28666412	https://bmcinfectdis.biomedcentral.com/articles/10.1186/s12879-017-2559-6
ATYPICAL OUTBREAK OF Q FEVER AFFECTING LOW-RISK RESIDENTS OF A REMOTE RURAL TOWN IN NEW SOUTH WALES	We investigated an outbreak of Q fever in a remote rural town in New South Wales, Australia. Cases identified through active and passive case finding activities, and retrospective laboratory record review were interviewed using a standard questionnaire. Two sets of case-case analyses were completed to generate hypotheses regarding clinical, epidemiological and exposure risk factors associated wit…	2017	No									Archer, BN, Hallahan, C, Stanley, P, Seward, K, Lesjak, M, Hope, K, Brown, A	COMMUNICABLE DISEASES INTELLIGENCE	41	2	E125-E133	Q fever, Coxiella burnetii, disease outbreaks, epidemiology		28899307	http://www.health.gov.au/internet/main/publishing.nsf/Content/cda-cdi4102a.htm
CLINICAL AND EPIDEMIOLOGICAL USE OF NESTED PCR TARGETING THE REPETITIVE ELEMENT IS1111 ASSOCIATED WITH THE TRANSPOSASE GENE FROM COXIELLA BURNETII	Q fever is a worldwide zoonosis caused by Coxiella burnetii-a small obligate intracellular Gram-negative bacterium found in a variety of animals. It is transmitted to humans by inhalation of contaminated aerosols from urine, feces, milk, amniotic fluid, placenta, abortion products, wool, and rarely by ingestion of raw milk from infected animals. Nested PCR can improve the sensitivity and specific…	2017	No									Mares-Guia, Maria Ang��lica M M, Guterres, Alexandro, Rozental, Tatiana, Ferreira, Michelle Dos Santos, Lemos, Elba R S	BRAZILIAN JOURNAL OF MICROBIOLOGY : [PUBLICATION OF THE BRAZILIAN SOCIETY FOR MICROBIOLOGY]					10.1016/j.bjm.2017.04.009	28899604	https://linkinghub.elsevier.com/retrieve/pii/S1517-8382(16)30401-4
COXIELLA BURNETII (Q FEVER) INFECTION IN DAIRY CATTLE AND ASSOCIATED RISK FACTORS IN LATVIA	The purpose of this study was to describe prevalence and spatial distribution of Coxiella burnetii infections in dairy cow sheds in Latvia and to investigate risk factors contributing to C. burnetii infections. Blood serum samples from abortion cases from 1010 sheds have been tested by ELISA for the presence of C. burnetii antibodies and bulk tank milk (BTM) samples from 252 sheds have been teste…	2017	No									Boroduske, A, Trofimova, J, Kibilds, J, Papule, U, Sergejeva, M, Rodze, I, Grantina-Ievina, L	EPIDEMIOLOGY AND INFECTION	145	10	2011-2019	ELISA, Q fever, risk assessment, serology, zoonoses	10.1017/S0950268817000838	28462725	https://www.cambridge.org/core/product/identifier/S0950268817000838/type/journal_article
COXIELLA BURNETII IMMUNOGENIC PROTEINS AS A BASIS FOR NEW Q FEVER DIAGNOSTIC AND VACCINE DEVELOPMENT	Coxiella burnetii is the etiological agent of the zoonosis Q fever, which can cause an acute or a chronic, life-threatening disease in humans. It presents a highly stable cell form, which persists in the environment and is transmitted via contaminated aerosols. Ruminants are considered as the main reservoir for human infections but are usually asymptomatic. Subclinical infection in these animals …	2017	No									Gerlach, C, Skultety, E, Henning, K, Neubauer, H, Mertens, K	ACTA VIROLOGICA	61	3	377-390	Coxiella burnetii, proteomic analysis, immunoreactive proteins, specificity, sensitivity, serological diagnostics	10.4149/av_2017_320	28854806	http://www.aepress.sk/_downloads/dl.php?from=pubmed&journal=AV&file=2017_03_377.pdf
DOT MAP CARTOGRAMS FOR DETECTION OF INFECTIOUS DISEASE OUTBREAKS: AN APPLICATION TO Q FEVER, THE NETHERLANDS AND PERTUSSIS, GERMANY	Geographical mapping of infectious diseases is an important tool for detecting and characterising outbreaks. Two common mapping methods, dot maps and incidence maps, have important shortcomings. The former does not represent population density and can compromise case privacy, and the latter relies on pre-defined administrative boundaries. We propose a method that overcomes these limitations: dot …	2017	No									Soetens, L, Hahne, S, Wallinga, J	EUROSURVEILLANCE	22	26	23-29		10.2807/1560-7917.ES.2017.22.26.30562	NA	NA
EPIDEMIOLOGY OF BRUCELLOSIS, Q FEVER AND RIFT VALLEY FEVER AT THE HUMAN AND LIVESTOCK INTERFACE IN NORTHERN COTE D'IVOIRE	Northern Cote d'Ivoire is the main livestock breeding zone and has the highest livestock cross-border movements in Cote d'Ivoire. The aim of this study was to provide updated epidemiological data on three neglected zoonotic diseases, namely brucellosis, Q Fever and Rift Valley Fever (RVF). We conducted three-stage cross-sectional cluster surveys in livestock and humans between 2012 and 2014 in a …	2017	No									Kanoute, YB, Gragnon, BG, Schindler, C, Bonfoh, B, Schelling, E	ACTA TROPICA	165		66-75	Cbte d'Ivoire, Human, Livestock, Brucellosis, Q Fever, Rift Valley Fever	10.1016/j.actatropica.2016.02.012	26899680	https://linkinghub.elsevier.com/retrieve/pii/S0001-706X(16)30066-3
FROM Q FEVER TO COXIELLA BURNETII INFECTION: A PARADIGM CHANGE	Coxiella burnetii is the agent of Q fever, or "query fever," a zoonosis first described in Australia in 1937. Since this first description, knowledge about this pathogen and its associated infections has increased dramatically. We review here all the progress made over the last 20 years on this topic. C. burnetii is classically a strict intracellular, Gram-negative bacterium. However, a major ste…	2017	No									Eldin, C, Melenotte, C, Mediannikov, O, Ghigo, E, Million, M, Edouard, S, Mege, JL, Maurin, M, Raoult, D	CLINICAL MICROBIOLOGY REVIEWS	30	1	115-190	Coxiella burnetii, diagnosis, Q fever, treatment, epidemiology, genomics	10.1128/CMR.00045-16	27856520	http://cmr.asm.org/cgi/pmidlookup?view=long&pmid=27856520
HERD-LEVEL PREVALENCE OF SELECTED ENDEMIC INFECTIOUS DISEASES OF DAIRY COWS IN GREAT BRITAIN	To implement appropriate and effective disease control programs at the national level, up-to-date and unbiased information on disease frequency is needed. The aim of this study was to estimate the prevalence of selected endemic infectious diseases in the population of dairy herds in Great Britain. Bulk milk tank (BMT) samples from 225 randomly selected dairy farms, stratified by region and herd s…	2017	No									Velasova, Martina, Damaso, Angela, Prakashbabu, Bhagyalakshmi Chengat, Gibbons, Jenny, Wheelhouse, Nick, Longbottom, David, Van Winden, Steven, Green, Martin, Guitian, Javier	JOURNAL OF DAIRY SCIENCE	100	11	9215-9233		10.3168/jds.2016-11863	28843682	https://linkinghub.elsevier.com/retrieve/pii/S0022-0302(17)30793-2
INDIVIDUAL AND INTERACTIVE EFFECTS OF SOCIO-ECOLOGICAL FACTORS ON DENGUE FEVER AT FINE SPATIAL SCALE: A GEOGRAPHICAL DETECTOR-BASED ANALYSIS	Background: Large spatial heterogeneity was observed in the dengue fever outbreak in Guangzhou in 2014, however, the underlying reasons remain unknown. We examined whether socio-ecological factors affected the spatial distribution and their interactive effects. Methods: Moran's I was applied to first examine the spatial cluster of dengue fever in Guangzhou. Nine socio-ecological factors were chos…	2017	No									Cao, Z, Liu, T, Li, X, Wang, J, Lin, HL, Chen, LL, Wu, ZF, Ma, WJ	INTERNATIONAL JOURNAL OF ENVIRONMENTAL RESEARCH AND PUBLIC HEALTH	14	7	-	dengue fever, socio-ecological factors, geographical detectors, GIS and RS	10.3390/ijerph14070795	NA	NA
MOLECULAR DETECTION OF COXIELLA BURNETII FROM THE FORMALIN-FIXED TISSUES OF Q FEVER PATIENTS WITH ACUTE HEPATITIS	Serologic diagnosis is one of the most widely used diagnostic methods for Q fever, but the window period in antibody response of 2 to 3 weeks after symptom onset results in significant diagnostic delay. We investigated the diagnostic utility of Q fever PCR from formalin-fixed liver tissues in Q fever patients with acute hepatitis., We reviewed the clinical and laboratory data in patients with Q f…	2017	No									Jang, Young-Rock, Shin, Yong, Jin, Choong Eun, Koo, Bonhan, Park, Se Yoon, Kim, Min-Chul, Kim, Taeeun, Chong, Yong Pil, Lee, Sang-Oh, Choi, Sang-Ho, Kim, Yang Soo, Woo, Jun Hee, Kim, Sung-Han, Yu, Eunsil	PLOS ONE	12	7	e0180237	Acute Disease, Adult, Aged, Coxiella burnetii, Formaldehyde, Hepatitis, Humans, Male, Middle Aged, Q Fever, Retrospective Studies, Tissue Fixation	10.1371/journal.pone.0180237	28672014	http://dx.plos.org/10.1371/journal.pone.0180237
PROTEIN COMPOSITION OF THE PHASE I COXIELLA BURNETII SOLUBLE ANTIGEN PREPARED BY EXTRACTION WITH TRICHLOROACETIC ACID	Q fever is a highly infectious, widespread airborne zoonosis caused by Coxiella burnetii bacterium. Humans usually acquire the disease by inhalation of contaminated aerosol produced by infected livestock. Vaccination is the most practical way for prevention and control of the disease in the exposed population. In this work, we reviewed the most important Q-fever outbreaks in Slovakia as well as t…	2017	No									Flores-Ramirez, G, Kmetova, M, Danchenko, M, Spitalska, E, Havlicek, V, Skultety, L	ACTA VIROLOGICA	61	3	361-368	Coxiella burnetii, Q fever, outbreaks in Slovakia, soluble antigen, chemovaccine, trichloroacetic acid, protein composition	10.4149/av_2017_317	28854803	http://www.aepress.sk/_downloads/dl.php?from=pubmed&journal=AV&file=2017_03_361.pdf
QUANTIFICATION OF ACETAMINOPHEN AND ITS METABOLITES IN PLASMA USING UPLC-MS: DOORS OPEN TO THERAPEUTIC DRUG MONITORING IN SPECIAL PATIENT POPULATIONS	Background: Acetaminophen (APAP, paracetamol) is the most commonly used drug for pain and fever in both the United States and Europe and is considered safe when used at registered dosages. Nevertheless, differences between specific populations lead to remarkable changes in exposure to potentially toxic metabolites. Furthermore, extended knowledge is required on metabolite formation after intoxica…	2017	No									Flint, RB, Mian, P, van der Nagel, B, Slijkhuis, N, Koch, BCP	THERAPEUTIC DRUG MONITORING	39	2	164-171	acetaminophen, metabolites, UPLC-MS/MS, therapeutic drug monitoring, pharmacokinetics		28169862	http://Insights.ovid.com/pubmed?pmid=28169862
SEROPREVALENCE OF COXIELLA BURNETII ANTIBODIES AMONG RUMINANTS AND OCCUPATIONALLY EXPOSED PEOPLE IN THAILAND, 2012-2013	Little is known about the burden of Q fever in Thailand. We conducted a serological study to describe the prevalence of anti-Coxiella burnetii antibodies among ruminants and occupationally exposed persons in response to the report of the first two Q fever endocarditis patients in Thailand in 2012. We randomly selected ruminant sera from brucellosis surveillance and examined sera of 661 occupation…	2017	No									Doung-Ngern, P, Chuxnum, T, Pangjai, D, Opaschaitat, P, Kittiwan, N, Rodtian, P, Buameetoop, N, Kersh, GJ, Padungtod, P	AMERICAN JOURNAL OF TROPICAL MEDICINE AND HYGIENE	96	4	786-790		10.4269/ajtmh.16-0336	28115661	http://www.ajtmh.org/content/journals/10.4269/ajtmh.16-0336?crawler=true&mimetype=application/pdf
SIGNIFICANCE OF MAJOR INTERNATIONAL SEAPORTS IN THE DISTRIBUTION OF MURINE TYPHUS IN TAIWAN	Background International seaports are hotspots for disease invasion and pathogens can persist in seaports even after ports are abandoned. Transmitted by fleas infected by Rickettsia typhi, murine typhus, a largely neglected and easily misdiagnosed disease, is known to occur primarily in large seaports. However, the significance of seaports in the occurrence of murine typhus has never been validat…	2017	No									Kuo, CC, Wardrop, N, Chang, CT, Wang, HC, Atkinson, PM	PLOS NEGLECTED TROPICAL DISEASES	11	3	-		10.1371/journal.pntd.0005430	28264003	http://dx.plos.org/10.1371/journal.pntd.0005430
SIMULTANEOUS UHPLC-UV ANALYSIS OF HYDROXYCHLOROQUINE, MINOCYCLINE AND DOXYCYCLINE FROM SERUM SAMPLES FOR THE THERAPEUTIC DRUG MONITORING OF Q FEVER AND WHIPPLE'S DISEASE	A fast UHPLC-UV method was developed for the simultaneous analysis of Hydroxychloroquine, Minocycline and Doxycycline drugs from 100 mu L of human serum samples. Serum samples were extracted by liquid liquid extraction and injected into a phenyl hexyl reverse phase column. Compounds were separated using a mobile phase linear gradient and monitored by UV detection at 343 nm. Chloroquine and Oxytet…	2017	No									Armstrong, N, Richez, M, Raoult, D, Chabriere, E	JOURNAL OF CHROMATOGRAPHY B-ANALYTICAL TECHNOLOGIES IN THE BIOMEDICAL AND LIFE SCIENCES	1060		166-172	Hydroxychloroquine, Minocycline, Doxycycline, UHPLC, UV, Q fever, Whipple's disease	10.1016/j.jchromb.2017.06.011	28622620	https://linkinghub.elsevier.com/retrieve/pii/S1570-0232(17)30329-X
SPATIAL PREDICTION OF COXIELLA BURNETII OUTBREAK EXPOSURE VIA NOTIFIED CASE COUNTS IN A DOSE-RESPONSE MODEL	We develop a novel approach to study an outbreak of Q fever in 2009 in the Netherlands by combining a human dose-response model with geostatistics prediction to relate probability of infection and associated probability of illness to an effective dose of Coxiella burnetii. The spatial distribution of the 220 notified cases in the at-risk population are translated into a smooth spatial field of do…	2017	No									Brooke, RJ, Kretzschmar, MEE, Hackert, V, Hoebe, CJPA, Teunis, PFM, Waller, LA	EPIDEMIOLOGY	28	1	127-135		10.1097/EDE.0000000000000574	27768623	http://Insights.ovid.com/pubmed?pmid=27768623
THE EFFECT OF WIND ON COXIELLA BURNETII TRANSMISSION BETWEEN CATTLE HERDS: A MECHANISTIC APPROACH	There is a consensus that wind plays a key role in the transmission of Coxiella burnetii, the causative agent of Q fever, between ruminants and from ruminants to humans. However, no observational study so far has focused on the mechanisms associated with this airborne transmission. This study applied a mechanistic epidemiological approach to investigate the processes underlying the wind effect an…	2017	No									Nusinovici, S, Hoch, T, Brahim, ML, Joly, A, Beaudeau, F	TRANSBOUNDARY AND EMERGING DISEASES	64	2	585-592	Q fever, transmission, wind, risk factor, mechanistic epidemiology, dairy cattle	10.1111/tbed.12423	26392118	http://dx.doi.org/10.1111/tbed.12423
THE SEROPREVALENCE OF COXIELLA BURNETII IN ERZINCAN, TURKEY: IDENTIFICATION OF THE RISK FACTORS AND THEIR RELATIONSHIP WITH GEOGRAPHICAL FEATURES	Background & objectives: Coxiella burnetii (C. burnetii) bacterium, the causative agent of Q fever has regained importance due to the increasing cases of infections and outbreaks. A cross-sectional descriptive study was conducted to investigate the seroprevalence of C. burnetii in human populations of Erzincan province located in the eastern Turkey, identify the risk factors, and to explore the r…	2017	No									Cikman, A, Aydin, M, Gulhan, B, Karakecili, F, Ozcicek, A, Kesik, OA, Parlak, M, Ozcelik, F, Gultepe, B	JOURNAL OF VECTOR BORNE DISEASES	54	2	157-163	Coxiella burnetii, geographical features, Q fever, risk factors, seroprevalence		28748837	http://www.nimr.org.in/assets/542157.pdf
TRANSMISSION OF COXIELLA BURNETII TO CAGE MATES USING MURINE ANIMAL MODEL	Aerosols from the products of abortions of infected animals with Coxiella burnetii were known to be the main source of infection in humans with this bacterium. However, little is known about the excretion of C. burnetii in the feces and urine of infected mice, or the dynamic of transmission between infected and healthy mice. To investigate whether C. burnetii can be excreted in the feces and urin…	2017	No									Bechah, Y, Raoult, D	COMPARATIVE IMMUNOLOGY MICROBIOLOGY AND INFECTIOUS DISEASES	50		29-33	Coxiella burnetii, Animal, Aerosol route, Transmission, Cage, Mates, Feces, Urine	10.1016/j.cimid.2016.11.009	28131375	https://linkinghub.elsevier.com/retrieve/pii/S0147-9571(16)30116-3
USE OF A DOSE-RESPONSE MODEL TO STUDY TEMPORAL TRENDS IN SPATIAL EXPOSURE TO COXIELLA BURNETII: ANALYSIS OF A MULTIYEAR OUTBREAK OF Q FEVER	The Netherlands underwent a large Q fever outbreak between 2007 and 2009. In this paper, we study spatial and temporal Coxiella burnetii exposure trends during this large outbreak as well as validate outcomes against other published studies and provide evidence to support hypotheses on the causes of the outbreak. To achieve this, we develop a framework using a dose-response model to translate acu…	2017	No									Brooke, RJ, Teunis, PFM, Kretzschmar, MEE, Wielders, CCH, Schneeberger, PM, Waller, LA	ZOONOSES AND PUBLIC HEALTH	64	2	118-126	Q fever, Coxiella burnetii, outbreak, dose-response, model-based geostatistics	10.1111/zph.12288	27549241	http://dx.doi.org/10.1111/zph.12288
USE OF GEOGRAPHICAL INFORMATION SYSTEM AND ECOLOGICAL NICHE MODEL TO ANALYSE POTENTIAL EXPOSURE OF SMALL RUMINANTS TO COXIELLA BURNETII INFECTION IN CENTRAL GREECE	Seroprevalence of Coxiella burnetii in sheep and goats in central Greece was investigated. Objectives were: (i) to describe spatial distribution of sheep and goat exposure to C. burnetii in the study area, (ii) to identify environmental parametres related to C. burnetii exposure and (iii) to recognise high risk areas for sheep and goat exposure to C. burnetii. Blood samples were collected from sh…	2017	No									Valiakos, G, Giannakopoulos, A, Spanos, SA, Korbou, F, Chatzopoulos, DC, Mavrogianni, VS, Spyrou, V, Fthenakis, GC, Billinis, C	SMALL RUMINANT RESEARCH	147		77-82	Coxiella, ENM, GIS, maximum entropy, Q fever, ruminants	10.1016/j.smallrumres.2016.12.042	NA	NA
ASSESSMENT TOOLS IN SUPPORT OF EPIDEMIOLOGICAL INVESTIGATION OF AIRBORNE DISPERSION OF PATHOGENS	Human health threats posed by airborne pathogens are difficult to handle for healthcare responders due to the fact that the contaminated area is not immediately recognizable. By means of wind dispersion modeling, it is possible to estimate the extent and geographical position of hazardous areas and health impact. Contemporary modeling tools can run on standard PCs, with short processing time and …		No									Pedersen, Ulrik Bo, Hansen, John-Erik Stig	AMERICAN JOURNAL OF DISASTER MEDICINE	3	6	327-33	Air Pollutants, Animals, Bioterrorism, Decision Support Techniques, Disaster Planning, Disease Outbreaks, Humans, Legionellosis, Meteorological Concepts, Q Fever, Risk Assessment, Severe Acute Respiratory Syndrome, Wind		19202886	NA
DISEASES CAUSED BY BACTERIA AND RICKETTSIA IN BIOLOGICAL WARFARE AND BIOTERRORISM	Until recently, the use of biological weapons was considered more from an academic than practical point of view. The list of agents and/or toxins that can be used as biological weapons is long. Some of them are highly lethal, while others cause morbidity and disability., Bacteria, rickettsia, viruses, fungi, protozoa and toxins can all be used as biological weapons. The infection may be acquired …		No									Boji��, Ivanko, Vukadinov, Jovan, Mini��, Svetlana	MEDICINSKI PREGLED	60	3-4	195-7	Bacterial Infections, Biological Warfare, Bioterrorism, Humans, Rickettsia Infections		17853736	NA
PREVALENCE OF ANTIBODIES AGAINST COXIELLA BURNETII IN 2 GEOGRAPHICAL ZONES OF TUSCANY	Q Fever, caused by Coxiella burneti, was first identified as a separate syndrome in 1937 in Australia. Usually it takes the form of an acute atypic lung pneumonia disease, but subclinic or non-typical forms are also known. Q Fever is a zoonoses. The most important source of infection is represented by sheep; the transmission to man occurs by vectors (ticks), or more often by carriers as aerosol, …		No									Tiscione, E, Ademollo, B, Donato, R, Roller, S, Signorini, L F	ANNALI DI IGIENE : MEDICINA PREVENTIVA E DI COMUNITA	1	5	1133-43	Animals, Antibodies, Bacterial, Coxiella, Cross-Sectional Studies, Humans, Italy, Q Fever, Rural Population, Sheep, Sheep Diseases, Urban Population, Zoonoses		2483896	NA
Q FEVER IN ISRAEL	Q fever was first described over fifty years ago. While in a proportion of cases there is a clear etiologic link to farm animals, their products, and fomites, in the majority of cases no such association is apparent, and the mode of infection is a mystery., In this paper, we examine the reported incidence of Q fever in Israel since it was made notifiable in 1951, and in particular for the period …		No									Yarrow, A, Slater, P E, Costin, C	PUBLIC HEALTH REVIEWS	18	2	129-37	Adolescent, Adult, Age Factors, Aged, Child, Child, Preschool, Female, Humans, Infant, Infant, Newborn, Israel, Male, Middle Aged, Occupational Exposure, Q Fever, Risk Factors, Sex Factors, Zoonoses		2134719	NA
Q FEVER: CURRENT CONCEPTS	Persons with Q fever usually present with severe retrobulbar headache, a fever to 104 degrees F or higher with shaking chills, general malaise, myalgia, chest pain, and sometimes pneumonia and hepatitis. Cattle, sheep, goats, and ticks are the primary reservoirs of the etiologic agent, Coxiella burnetii. Humans are usually infected by inhaling infectious aerosols. Because C. burnetii can survive …		No									Sawyer, L A, Fishbein, D B, McDade, J E	REVIEWS OF INFECTIOUS DISEASES	9	5	935-46	Animals, Humans, Q Fever		3317737	NA
RICKETTSIOSES AND Q FEVER IN TRAVELERS (2004-2013)	Rickettsioses (also called typhus) are associated with arthropods, including ticks, mites, fleas, and lice, although Q fever is more frequently acquired through the inhalation of contaminated aerosols or the consumption of milk. These zoonoses first emerged in the field of travel medicine 20 years ago. Here, we review rickettsioses and Q fever in travelers, highlighting cases reported in the past…		No									Delord, Marion, Socolovschi, Cristina, Parola, Philippe	TRAVEL MEDICINE AND INFECTIOUS DISEASE	12	5	443-58	Adult, Aged, Female, Humans, Male, Middle Aged, Q Fever, Rickettsia Infections, Travel, Travel Medicine, Young Adult	10.1016/j.tmaid.2014.08.006	25262433	https://linkinghub.elsevier.com/retrieve/pii/S1477-8939(14)00158-6
RICKETTSIAE AND RICKETTSIAL DISEASES	This paper summarizes present knowledge on rickettsiae and rickettsial diseases, and on their epidemiological characteristics, control, and public health significance. There are many natural foci of rickettsial diseases, from where the disease may spread to other areas in the world under changing socioeconomic conditions. Because of rapid long-distance travel, sporadic cases of serious rickettsia…	1973										Brezina, R, Murray, E S, Tarizzo, M L, B��gel, K	BULLETIN OF THE WORLD HEALTH ORGANIZATION	49	5	433-42	Antigens, Bacterial, Arthropod Vectors, Humans, Public Health, Rickettsia, Rickettsia Infections, Serologic Tests, Serotyping		4547297	NA
